# Supplementary material
Source: PubMed Central journal article supplement (PMC2849279)

# ***endo*-Selective Enyne Ring-Closing Metathesis Promoted by Stereogenic-at-Mo Monoalkoxide and Monoaryloxo Complexes. Efficient Synthesis of Cyclic Dienes Not Accessible through Reactions with Ru Carbenes**

Yeon-Ju Lee,<sup>#</sup> Richard R. Schrock,<sup>+</sup> and Amir H. Hoveyda<sup>#,\*</sup>

<sup>#</sup>*Department of Chemistry, Merkert Chemistry Center,  
Boston College, Chestnut Hill, Massachusetts 02467*

<sup>+</sup>*Department of Chemistry, Massachusetts Institute of Technology  
Cambridge, Massachusetts 02139*

## **SUPPORTING INFORMATION, PART A**

**General:** All reactions were carried out in oven- (135 °C) or flame-dried glassware under an inert atmosphere of dry N<sub>2</sub> unless otherwise stated. All the substrates were dried by azeotropic distillation with C<sub>6</sub>H<sub>6</sub> prior to use in reactions with Mo-based reagents. Substrates **1**<sup>1</sup>, **8**<sup>1</sup>, **9**<sup>1</sup>, **10**<sup>2</sup> and **11**<sup>3</sup> bearing diester tether were synthesized according to previously reported procedures. Substrate **12** bearing an acetonide tether was synthesized according to previously reported procedure.<sup>4</sup> Nitrogen-containing substrates **16a**<sup>5</sup>, **16c**<sup>6</sup>, **19**<sup>7</sup>, **20**<sup>5</sup>, **21**<sup>8</sup>, **22**<sup>3</sup>, **24**<sup>9</sup> and **27**<sup>9</sup> were synthesized according to previously reported procedures. Oxygen-containing substrates **31**<sup>10</sup> and **34**<sup>11</sup> were synthesized according to previously reported procedures. Dienenyne **43**<sup>12</sup> was synthesized according to previously reported procedures. Infrared (IR) spectra were recorded on a Bruker FTIR Alpha (ATR Mode) spectrometer,  $\nu_{\max}$  in cm<sup>-1</sup>. Bands are characterized as broad (br), strong (s), medium (m), or weak (w). <sup>1</sup>H NMR spectra were recorded on a Varian Unity INOVA 400 (400 MHz) spectrometer. Chemical shifts are reported in ppm from tetramethylsilane with the solvent resonance resulting from incomplete deuteration as the

- 
- (1) Singh, R.; Schrock, R. R.; Müller, P.; Hoveyda, A. H. *J. Am. Chem. Soc.* **2007**, *129*, 12654–12655.
  - (2) Pagenkopf, B. L.; Livinghouse, T. *J. Am. Chem. Soc.* **1996**, *118*, 2285–2286.
  - (3) Kitamura, T.; Sato, Y.; Mori, M. *Adv. Synth. Catal.* **2002**, *344*, 678–693.
  - (4) Ojima, I.; Vu, A. T.; Lee, S.-Y.; McCullagh, J. B.; Moralee, A. C.; Fujiwara, M.; Hoang, T. H. *J. Am. Chem. Soc.* **2002**, *124*, 9164–9174.
  - (5) Gibson, S. E.; Hardick, D. J.; Haycock, P. R.; Kaufmann, K. A. C.; Miyazaki, A.; Tozer, M. J.; White, A. J. P. *Chem. Eur. J.* **2007**, *13*, 7099–7109.
  - (6) Becker, D. P.; Flynn, D. L. *Tetrahedron* **1993**, *49*, 5047–5054.
  - (7) Kavanagh, Y.; Chaney, C. M.; Muldoon, J.; Evans, P. *J. Org. Chem.* **2008**, *73*, 8601–8604.
  - (8) Monnier, F.; Bray, C. V.-L.; Castillo, D.; Aubert, V.; Dérien, S.; Dixneuf, P. H.; Toupet, L.; Ienco, A.; Mealli, C. *J. Am. Chem. Soc.* **2007**, *129*, 6037–6049.
  - (9) Mori, M.; Tanaka, D.; Saito, N.; Sato, Y. *Organometallics* **2008**, *27*, 6313–6320.
  - (10) Nielson, T. E.; Qument, S. L.; Tanner, D. *Synthesis* **2004**, *9*, 1381–1390.
  - (11) Mori, M.; Sakakibara, N.; Kinoshita, A. *J. Org. Chem.* **1998**, *63*, 6082–6083.
  - (12) Jeong, N.; Kim D. H.; Choi, J. H. *Chem. Commun.* **2004**, *4*, 1134–1135.

internal reference (CDCl<sub>3</sub>: δ 7.26 ppm, C<sub>6</sub>D<sub>6</sub>: δ 7.16 ppm). Data are reported as follows: chemical shift, multiplicity (s = singlet, d = doublet, t = triplet, q = quartet, quin = quintet, sep = septet, br = broad, m = multiplet), coupling constants (Hz), integration. <sup>13</sup>C NMR spectra were recorded on a Varian Unity INOVA 400 (100 MHz) spectrometer with complete proton decoupling. Chemical shifts are reported in ppm from tetramethylsilane with the solvent as the internal reference (CDCl<sub>3</sub>: δ 77.16 ppm, C<sub>6</sub>D<sub>6</sub>: δ 128.06 ppm). Enantiomer ratios were determined by HPLC (Chiral Technologies Chiralpak AS column (4.6 mm x 250 mm)) in comparison with authentic racemic materials. High resolution mass spectrometry was performed on a Micromass LCT ESI-MS (positive mode) at the Boston College Mass Spectrometry Laboratory. Elemental analysis was performed at Midwest Microlab, LLC (Indianapolis, IN). Optical rotation values were recorded on a Rudolph Research Analytical Autopol IV polarimeter. Melting points were measured on a Thomas Hoover capillary melting point apparatus and are uncorrected. X-ray crystallography was performed at the Boston College X-ray Crystallographic Laboratory.

**Solvents:** Solvents were purged with argon and purified under a positive pressure of dry argon by a modified Innovative Technologies purification system: diethyl ether (Aldrich) and dichloromethane (Doe & Ingalls) were passed through activated alumina columns; benzene (Aldrich), toluene (Doe & Ingalls), and pentane (J T. Baker) were passed successively through activated Cu and alumina columns. Tetrahydrofuran (Aldrich), 2-methyltetrahydrofuran (Aldrich) and 2,5-dimethyltetrahydrofuran (Aldrich) were distilled from sodium benzophenone ketyl. *N,N*-Dimethylformamide and dimethylsulfoxide were distilled from CaH<sub>2</sub> under reduced pressure.

**Metal-based Complexes:** Mo-based bis(alkoxide) complex **4** was prepared according to a previously reported procedure.<sup>13</sup> Mo-bis(pyrrolide) complex **6** was prepared according to a previously reported procedure.<sup>14</sup> Mo-monoalkoxide-monopyrrolide complexes **5** and **28** were prepared according to previously reported procedures.<sup>1</sup> Mo-monoaryloxy complexes (**44a**, **44b**) bearing chiral aryloxy ligands were generated *in-situ* and used under an inert atmosphere in a dry box according to previously reported procedures.<sup>15</sup> Ru-based complex **7**<sup>16</sup> was obtained from Materia, Inc. and purified by silica gel column chromatography and recrystallization (CH<sub>2</sub>Cl<sub>2</sub>/ *n*-pentane) prior to use.

**Reagents and Ligands:**

***o*-Nitrobenzenesulfonyl chloride** was purchased from Aldrich and recrystallized from hexanes and dichloromethane prior to use.

**Propargylamine** was purchased from Aldrich and distilled over K<sub>2</sub>CO<sub>3</sub> prior to use.

**1-Phenyl-2-propyn-1-ol** was purchased from Aldrich and used as received.

---

(13) Schrock, R. R.; Hoveyda, A. H. *Angew. Chem., Int. Ed.* **2003**, *42*, 4592–4633.

(14) Singh, R.; Czekelius, C.; Schrock, R. R.; Müller, P. M.; Hoveyda, A. H. *Organometallics* **2007**, *26*, 2528–2539.

(15) (a) Malcolmson, S. J.; Meek, S. J.; Sattely, E. S.; Schrock, R. R.; Hoveyda, A. H. *Nature* **2008**, *456*, 933–937.

(b) Sattely, E. S.; Meek, S. J.; Malcolmson, S. J.; Schrock, R. R.; Hoveyda, A. H. *J. Am. Chem. Soc.* **2009**, *131*, 943–953.

(16) Garber, S. B.; Kingsbury, J. S.; Gray, B. L.; Hoveyda, A. H. *J. Am. Chem. Soc.* **2000**, *122*, 8168–8179.

**Chlorodimethylvinylsilane** was purchased from Aldrich and used as received.

**Triethylamine** was purchased from Aldrich and distilled from CaH<sub>2</sub> prior to use.

**Chloromethylphenylcynylsilane** was purchased from Gelest and used as received.

**Sodium hydride** was purchased from Aldrich and used as received.

***d*<sub>6</sub>-Benzene** was purchased from Cambridge Isotope Laboratories and distilled from Na metal into activated 4 Å molecular sieves prior to use.

**1-Naphthol**, **2-phenylphenol** and **2,6-diphenylphenol** were purchased from Aldrich, recrystallized from hexanes and azeotroped with C<sub>6</sub>H<sub>6</sub> prior to use.

**Propargyl bromide (80% solution in toluene)** was purchased from Aldrich and used as received.

**Isopropenylmagnesium bromide (0.5 M solution in tetrahydrofuran)** was purchased from Aldrich and used as received.

**1,1,1-Trifluoroacetone** was purchased from Acros and distilled over K<sub>2</sub>CO<sub>3</sub> prior to use.

**Na-EDTA (4.0 μM aqueous solution)** was purchased from Aldrich and used as received.

**Oxone®** was purchased from Aldrich and used as received.

### Preparation of Enyne Substrates

**5-(But-3-enyl)-2,2-dimethyl-5-(prop-2-ynyl)-1,3-dioxane (13).** This compound was prepared in analogous fashion to **12<sup>4</sup>** starting from **8<sup>1</sup>** (360 mg, 1.43 mmol). Purification by silica gel column chromatography afforded **13** (208 mg, 0.880 mmol, 62% yield over two steps) as a colorless oil. IR (neat): 3305 (br), 3078 (m), 2992 (m), 2862 (m), 1642 (w), 1443 (w), 1196 (s), 1071 (m), 912 (m) cm<sup>-1</sup>; <sup>1</sup>H NMR (400 MHz, CDCl<sub>3</sub>): δ 5.80 (dddd, *J* = 17.2, 10.0, 6.8, 6.4 Hz, 1H), 5.04 (ddd, *J* = 17.2, 3.2, 1.6 Hz, 1H), 4.96 (dddd, *J* = 10.0, 2.0, 1.6, 1.2 Hz, 1H), 3.66 (s, 4H), 2.47 (d, *J* = 2.4 Hz, 2H), 2.06-2.01 (m, 2H), 2.00 (t, *J* = 2.8 Hz, 1H), 1.47-1.42 (m, 2H), 1.41 (s, 3H), 1.40 (s, 3H); <sup>13</sup>C NMR (100 MHz, CDCl<sub>3</sub>): δ 138.5, 114.8, 98.3, 80.9, 70.9, 67.2, 35.2, 32.1, 27.2, 26.8, 21.0; HRMS (ESI) [M + H]<sup>+</sup> calcd for C<sub>13</sub>H<sub>21</sub>O<sub>2</sub>: 209.1542, found: 209.1537.

**5-Allyl-5-(but-2-ynyl)-2,2-dimethyl-1,3-dioxane (14).** This compound was prepared in analogous fashion to **12<sup>4</sup>** starting from **9<sup>1</sup>** (558 mg, 2.21 mmol). Purification by silica gel column chromatography afforded **14** (280 mg, 1.34 mmol, 63% yield over two steps) as a colorless oil. IR (neat): 3076 (w), 2991 (m), 2920 (br), 2860 (m), 1639 (w), 1439 (m), 1196 (s) cm<sup>-1</sup>; <sup>1</sup>H NMR (400 MHz, CDCl<sub>3</sub>): δ 5.75 (dddd, *J* = 12.0, 9.6, 8.0, 7.6 Hz, 1H), 5.12 (dddd, *J* = 9.6, 2.0, 1.2, 1.0 Hz, 1H), 5.10-5.08 (m, 1H), 3.64 (s, 4H), 2.29 (dd, *J* = 4.8, 2.4 Hz, 2H), 2.14 (dt, *J* = 7.6, 1.2 Hz, 2H), 1.79 (t, *J* = 2.8 Hz, 3H), 1.41 (s, 3H), 1.40 (s, 3H); <sup>13</sup>C NMR (100 MHz, CDCl<sub>3</sub>): δ 132.8, 118.8, 98.1, 78.3, 75.2, 66.9, 37.2, 35.7, 25.8, 22.8, 3.6; HRMS (ESI) [M + H]<sup>+</sup> calcd for C<sub>13</sub>H<sub>21</sub>O<sub>2</sub>: 209.1542, found: 209.1546.

**2,2-Dimethyl-5-(2-methylallyl)-5-(prop-2-ynyl)-1,3-dioxane (15).** This compound was prepared in analogous fashion to **12<sup>4</sup>** starting from **10<sup>2</sup>** (200 mg, 0.792 mmol). Purification by silica gel column chromatography afforded **15** (104 mg, 0.499 mmol, 63% yield over two steps) as a colorless oil. IR (neat): 3301 (br), 3075 (m), 2940 (br), 2864 (m), 1643 (w), 1452 (m), 1197 (s), 1071 (m), 899 (m) cm<sup>-1</sup>; <sup>1</sup>H NMR (400 MHz, CDCl<sub>3</sub>): δ 4.92 (d, *J* = 1.6 Hz, 1H), 4.78 (d, *J* =

0.8 Hz, 1H), 3.67 (dd,  $J = 17.2, 11.6$  Hz, 4H), 2.45-2.44 (m, 2H), 2.11 (s, 2H), 2.04-2.03 (m, 1H), 1.78 (s, 3H), 1.42(s, 3H), 1.40 (s, 3H);  $^{13}\text{C}$  NMR (100 MHz,  $\text{CDCl}_3$ ):  $\delta$  140.9, 115.7, 98.2, 81.3, 71.4, 67.1, 39.9, 36.0, 26.5, 25.3, 21.4; HRMS (ESI)  $[\text{M} + \text{H}]^+$  calcd for  $\text{C}_{13}\text{H}_{21}\text{O}_2$ : 209.1542, found: 209.1538.

***N*-Allyl-2-nitro-*N*-(prop-2-ynyl)benzenesulfonamide (16b).** This compound was prepared in analogous fashion to **16a**<sup>5</sup> starting from *o*-nitrobenzenesulfonyl chloride (560 mg, 2.53 mmol) and propargylamine (0.140 ml, 2.53 mmol). Purification by silica gel column chromatography afforded **16b** (495 mg, 1.77 mmol, 70% yield over two steps) as a white solid. M.p. = 48-51 °C; IR (neat): 3289 (m), 1543 (s), 1357 (m), 1165 (m), 899 (m)  $\text{cm}^{-1}$ ;  $^1\text{H}$  NMR (400 MHz,  $\text{CDCl}_3$ ):  $\delta$  8.05 (dd,  $J = 7.2, 2.4$  Hz, 1H), 7.74-7.63 (m, 3H), 5.71 (dddd,  $J = 17.2, 10.0, 9.6, 6.8$  Hz, 1H), 5.31 (ddt,  $J = 17.2, 1.2, 1.2$  Hz, 1H), 5.26 (ddt,  $J = 10.0, 1.2, 1.2$  Hz, 1H), 4.14 (d,  $J = 2.6$  Hz, 2H), 4.02 (d,  $J = 6.4$  Hz, 2H), 2.15 (t,  $J = 2.4$  Hz, 1H);  $^{13}\text{C}$  NMR (100 MHz,  $\text{CDCl}_3$ ):  $\delta$  148.3, 133.9, 132.9, 131.9, 131.5, 131.1, 124.3, 120.6, 76.8, 73.9, 49.5, 36.0; HRMS (ESI):  $[\text{M} + \text{H}]^+$  Calcd for  $\text{C}_{12}\text{H}_{13}\text{N}_2\text{O}_4\text{S}$ : 281.0596, found: 281.0584.

**Dimethyl(1-phenylprop-2-ynyloxy)(vinyl)silane (39).** An oven-dried round-bottom flask with magnetic stir bar was charged with 1-phenyl-2-propyn-1-ol (1.24 mL, 10.0 mmol) and tetrahydrofuran (30.0 mL). At 22 °C, triethylamine (1.67 mL, 12.0 mmol) was added in one portion followed by the dropwise addition (over 5 min) of chlorodimethylvinylsilane (1.66 mL, 12.0 mmol). The resulting mixture was allowed to stir for 0.5 h, during which time the formation of a white precipitate was observed. The mixture was diluted with diethyl ether (100 mL) and filtered to remove the white precipitates. The filtrate was concentrated and purified by silica gel column chromatography to afford **39** (1.71 g, 7.90 mmol, 79% yield) as a colorless oil. IR (neat): 3300 (m), 2959 (m), 1595 (w), 1407 (w), 1253 (m), 1089 (m), 1065 (s), 842 (s)  $\text{cm}^{-1}$ ;  $^1\text{H}$  NMR (400 MHz,  $\text{CDCl}_3$ ):  $\delta$  7.52-7.49 (m, 2H), 7.39-7.31 (m, 3H), 6.19 (dd,  $J = 20.4, 15.2$  Hz, 1H), 6.06 (dd,  $J = 20.4, 4.0$  Hz, 1H), 5.85 (dd,  $J = 20.4, 4.0$  Hz, 1H), 5.49 (d,  $J = 2.0$  Hz, 1H), 2.59 (d,  $J = 2.0$  Hz, 1H), 0.31 (s, 3H), 0.25 (s, 3H);  $^{13}\text{C}$  NMR (100 MHz,  $\text{CDCl}_3$ ):  $\delta$  141.0, 137.2, 134.0, 128.6, 128.2, 126.5, 84.5, 74.2, 64.8, -1.3, -1.4; HRMS (ESI)  $[\text{M}]^+$  calcd for  $\text{C}_{13}\text{H}_{16}\text{OSi}$ : 216.0970, found: 216.0967.

**Methyl(phenyl)(1-phenylprop-2-ynyloxy)(vinyl)silane (41).** This compound was prepared in analogous fashion to **39** starting from 1-phenyl-2-propyn-1-ol (1.24 mL, 10.0 mmol) and chloromethylphenylvinylsilane (1.67 mL, 12.0 mmol). Purification by silica gel column chromatography afforded **41** (1.43 g, 5.14 mmol, 51% yield) as a colorless oil (1:1 mixture of two diastereomers). IR (neat): 3290 (m), 2949 (m), 1592 (w), 1404 (m), 1254 (m), 1115 (m), 1087 (m), 1062 (s), 847 (s), 696 (s)  $\text{cm}^{-1}$ ;  $^1\text{H}$  NMR (400 MHz,  $\text{CDCl}_3$ ):  $\delta$  7.58-7.53 (m, 2H), 7.40-7.22 (m, 8H), 6.34-6.18 (m, 1H), 6.14-6.05 (m, 1H), 5.90-5.78 (m, 1H), 5.42 (dd,  $J = 6.4, 2.0$  Hz, 1H), 2.49 (dd,  $J = 3.6, 2.0$  Hz, 1H), 0.46 (d,  $J = 8.0$  Hz, 3H);  $^{13}\text{C}$  NMR (100 MHz,  $\text{CDCl}_3$ ):  $\delta$  135.7, 135.5, 135.2, 134.3, 134.2, 130.0, 128.5, 128.1, 127.9, 126.4, 84.2, 74.4, 65.1, -2.7; HRMS (ESI):  $[\text{M}]^+$  calcd for  $\text{C}_{18}\text{H}_{18}\text{OSi}$ : 278.1127, found: 278.1131.

***N*-(2,4-Dimethylpenta-1,4-dien-3-yl)-4-methyl-*N*-(prop-2-ynyl)benzenesulfonamide (47).** An oven-dried flask with magnetic stir bar was charged with isopropenylmagnesium bromide (0.5 M solution in tetrahydrofuran, 22.0 mL, 11.0 mmol) under nitrogen. The solution was allowed to cool to 0 °C and ethyl *N*-tosylformimidate<sup>17</sup> (1.14 g, 5.00 mmol) in 4.00 mL tetrahydrofuran was added dropwise over 5 min; the resulting mixture was allowed to warm to 22 °C and stir for 12 hr. The mixture was allowed to cool to 0°C, and the reaction was quenched by the addition of a saturated aqueous solution of ammonium chloride. The resulting mixture was diluted with diethyl ether (50.0 mL), washed with water (10.0 mL x 2) and brine (10.0 mL). The organic layer was dried over anhydrous magnesium sulfate, filtered and concentrated to afford a pale yellow solid. The crude solid was dissolved in *N,N*-dimethylformamide (5.00 mL) and added dropwise over 5 min to a suspension of NaH (145 mg, 6.00 mmol) in 10.0 ml of *N,N*-dimethylformamide at 0 °C. Propargyl bromide (80% solution in toluene, 0.67 mL, 6.00 mmol) was added in one portion and the resulting mixture was allowed to warm to 22 °C and stir for 2 h. The reaction was quenched by the addition of a saturated aqueous solution of ammonium chloride and the mixture was diluted with diethyl ether (80.0 mL), washed with water (15.0 mL x 2) and brine (15 mL), dried over anhydrous magnesium sulfate, filtered and concentrated. The resulting brown oil was purified by silica gel column chromatography to afford **47** (883 mg, 2.91 mmol, 58% yield over two steps) as a white solid. M.p. = 65–70 °C; IR (neat): 3276 (m), 2920 (m), 1598 (w), 1338 (s), 1160 (s), 908 (m), 661 (s) cm<sup>-1</sup>; <sup>1</sup>H NMR (400 MHz, CDCl<sub>3</sub>): δ 7.80 (d, *J* = 8.0 Hz, 2H), 7.25 (d, *J* = 8.0 Hz, 2H), 5.03 (s, 2H), 4.84 (s, 2H), 4.71 (s, 1H), 4.07 (d, *J* = 2.4 Hz, 2H), 2.41 (s, 3H), 2.07 (t, *J* = 2.4 Hz, 1H), 1.66 (s, 6H); <sup>13</sup>C NMR (100 MHz, CDCl<sub>3</sub>): δ 143.5, 141.2, 137.8, 129.4, 128.0, 115.7, 79.7, 72.0, 67.7, 34.2, 22.1, 21.8; HRMS (ESI) [M + H]<sup>+</sup> calcd for C<sub>17</sub>H<sub>22</sub>NO<sub>2</sub>S: 304.1371, found: 304.1369.

**Ethyl 2-(prop-2-ynyl)pent-4-enoate (50).** An oven-dried round-bottom flask with magnetic stir bar was charged with **1**<sup>1</sup> (1.00 g, 4.20 mmol) and dimethylsulfoxide (5.00 mL). Lithium chloride (214 mg, 5.04 mmol) was added followed by the addition of water (0.10 mL). The flask was fitted with a water-jacketed reflux condenser and the mixture was heated to 190 °C and allowed to stir for 12 h. The mixture was allowed to cool to 22 °C, washed with diethyl ether (30.0 ml x 2). The organic layer was washed with water (5.00 mL x 2), dried over anhydrous magnesium sulfate, filtered and concentrated. The resulting brown oil was purified by silica gel column chromatography to afford **50** (350 mg, 1.47 mmol, 35% yield) as a colorless oil. IR (neat): 3303 (br), 3080 (m), 1734 (s), 1642 (w), 1178 (m) cm<sup>-1</sup>; <sup>1</sup>H NMR (400 MHz, CDCl<sub>3</sub>): δ 5.72 (dddd, *J* = 17.2, 10.0, 7.2, 6.8 Hz, 1H), 5.10 (ddd, *J* = 16.8, 3.2, 1.6 Hz, 1H), 5.06 (ddd, *J* = 10.4, 1.6, 0.8 Hz, 1H), 4.16 (q, *J* = 7.2 Hz, 2H), 2.62 (quin, *J* = 7.2 Hz, 1H), 2.52–2.36 (m, 4H), 1.98 (t, *J* = 2.8 Hz, 1H), 1.25 (t, *J* = 7.2 Hz, 3H); <sup>13</sup>C NMR (100 MHz, CDCl<sub>3</sub>): δ 173.8, 134.5, 117.8, 81.4, 70.1, 60.8, 44.1, 35.2, 20.5, 14.4; HRMS (ESI) [M + H]<sup>+</sup> calcd for C<sub>10</sub>H<sub>15</sub>O<sub>2</sub>: 167.1072, found: 167.1070.

## Preparation of Mo Complexes

(17) Anglada, L.; Marquez, M.; Sacristan, A.; Ortiz, J. A. *Eur. J. Med. Chem.* **1988**, *23*, 97–100.

**Mo(NAr)(CHCMe<sub>2</sub>Ph)(2,5-Me<sub>2</sub>NC<sub>4</sub>H<sub>2</sub>)(2,6-diphenylphenoxide) (38a).** An oven-dried round-bottom flask with magnetic stir bar was charged with Mo-bispyrrolide complex **6** (200 mg, 0.338 mmol) and 5.00 mL of diethyl ether. To this solution was added 2,6-diphenylphenol (83.2 mg, 0.338 mmol) in 5.00 mL of diethyl ether in one portion at 22 °C. The resulting mixture was allowed to stir for 1 h at 22 °C and the volatiles were removed *in vacuo*. The resulting residue was dissolved in pentane (1.00 mL) and this solution was allowed to stand at -55 °C for 12 h, during which time the formation of orange crystals was observed. The crystals were collected by vacuum filtration to afford **38a** (201 mg, 0.270 mmol, 80% yield). <sup>1</sup>H NMR (400 MHz, C<sub>6</sub>D<sub>6</sub>): δ 11.70 (s, 1H), 7.90-7.88 (m, 4H), 7.53 (d, *J* = 8.0 Hz, 2H), 7.47-7.43 (m, 5H), 7.37-7.33 (m, 2H), 7.28-7.25 (m, 3H), 7.23-7.15 (m, 5H), 6.39 (s, 2H), 3.38 (sep, *J* = 6.4 Hz, 2H), 2.52 (br s, 6H), 1.82 (s, 3H), 1.50 (s, 3H), 1.21 (d, *J* = 6.4 Hz, 6H), 1.09 (d, *J* = 6.8 Hz, 6H); <sup>13</sup>C NMR (100 MHz, C<sub>6</sub>D<sub>6</sub>): δ 290.4, 160.0, 154.1, 148.9, 147.7, 140.0, 133.8, 133.2, 131.1, 129.7, 129.2, 128.4, 127.6, 126.2, 126.0, 123.1, 122.4, 109.4, 55.8, 31.8, 30.4, 28.7, 23.8, 23.4, 17.1; Elemental analysis: C 74.69, H 6.89, N, 3.87 (theory: C 74.38, H 6.78, N 3.77).

**Mo(NAr)(CHCMe<sub>2</sub>Ph)(2,5-Me<sub>2</sub>NC<sub>4</sub>H<sub>2</sub>)(2,3,5,6-tetraphenylphenoxide) (38b).** This complex was prepared by the exact same procedure for the formation of complex **38a** starting from Mo-bispyrrolide **6** (200 mg, 0.338 mmol) and 2,3,4,6-tetraphenylphenol<sup>18</sup> (135 mg, 0.338 mmol) (Reaction time = 4 h). Crystallization from pentane afforded **38b** as a bright orange solid. (230 mg, 0.257 mmol, 83%): <sup>1</sup>H NMR (400 MHz, C<sub>6</sub>D<sub>6</sub>): δ 11.67 (s, 1H), 7.57-7.53 (m, 5H), 7.42-7.39 (m, 6H), 7.30-7.19 (m, 12H), 7.19-7.05 (m, 6H), 6.30 (s, 2H), 3.43 (sep, *J* = 6.8 Hz, 2H), 2.31 (s, 6H), 1.90 (s, 3H), 1.49 (s, 3H), 1.31 (d, *J* = 6.8 Hz, 6H), 1.11 (d, *J* = 6.8 Hz, 6H); <sup>13</sup>C NMR (100 MHz, C<sub>6</sub>D<sub>6</sub>): δ 292.4, 160.1, 153.9, 149.0, 147.5, 142.5, 142.3, 137.8, 134.4, 132.1, 130.2, 128.5, 128.3, 127.4, 127.0, 126.6, 126.4, 126.3, 123.4, 55.5, 32.1, 31.1, 28.4, 24.0, 22.7, 17.2; Elemental analysis: C 77.84, H 6.78, N, 3.35 (theory: C 77.83, H 6.53, N 3.13).

***In-situ* generation of Mo-monoaryloxo complex for RCM reaction of 31 (Table 5, entry 1).**

A 1 dram vial with magnetic stir bar was charged with **6** (5.92 mg, 10.0 μmol), 1-naphthol (1.44 mg, 10.0 μmol) and C<sub>6</sub>D<sub>6</sub> (500 μL) in an N<sub>2</sub>-filled glovebox. The mixture was allowed to stir for 1 h at 22 °C, after which the solution was transferred to a screw-cap NMR tube by syringe. The NMR tube was tightly capped and sealed with Teflon tape. For *in-situ* generated complexes, only the diagnostic signal of the α-proton of the *syn*-alkylidene is reported. <sup>1</sup>H NMR (400 MHz, C<sub>6</sub>D<sub>6</sub>): δ 12.22 (1H, s).

**Mo-(2-phenylphenoxide) complex (Table 5, entry 2)** was generated from **6** (5.92 mg, 10.0 μmol), 2-phenylphenol (1.70 mg, 10.0 μmol) and C<sub>6</sub>D<sub>6</sub> (500 μL) following the same procedure as above (A mixture of **6** (28%), Mo-monoaryloxo (72%) and Mo-bisaryloxo (28%) was obtained). <sup>1</sup>H NMR (400 MHz, C<sub>6</sub>D<sub>6</sub>): δ 11.52 (1H, s).<sup>19</sup>

(18) Prepared as in Yates, P.; Hyre, J. E. *J. Org. Chem.* **1962**, *27*, 4101–4103.

(19) For the corresponding Mo-bisaryloxo complex, signal of the α-proton of the *syn*-alkylidene (<sup>1</sup>H NMR, 400 MHz, C<sub>6</sub>D<sub>6</sub>): δ 10.85 (1H, s).

## ■ Mo-Catalyzed Enyne Ring-Closing Metathesis Reactions

The procedures for the transformations in Scheme 2 and entries 1, 2 in table 1 and characterizations of the corresponding products have been reported.<sup>1</sup>

**Representative procedure for Mo-catalyzed enyne ring-closing metathesis reactions for the synthesis of carbocyclic and N-heterocyclic diene (Table 1, entry 3).** In an N<sub>2</sub>-filled glove box, a 4-mL vial with magnetic stir bar was charged with Mo-monoaryloxo complex **5** (1.36 mg, 2.00 μmol) and 50.0 μL of C<sub>6</sub>H<sub>6</sub>. A solution of **10** (10.1 mg, 40.0 μmol) in C<sub>6</sub>H<sub>6</sub> (200 μL) was added dropwise over five min. The mixture was allowed to stir at 22 °C for 0.5 h, after which the reaction was quenched by exposure to air. The mixture was concentrated to afford a brown residue, which was purified by silica gel column chromatography to afford the *endo* product (9.28 mg, 36.8 μmol, 92 % yield) as colorless oil. The physical and spectral data were identical to those previously reported.<sup>20</sup> <sup>1</sup>H NMR (400 MHz, CDCl<sub>3</sub>): δ 5.92 (s, 1H), 4.79 (s, 2H), 4.20-4.14 (m, 4H), 2.80 (s, 2H), 2.56 (s, 2H), 1.81 (s, 3H), 1.22 (t, *J* = 7.2 Hz, 6H); <sup>13</sup>C NMR (100 MHz, CDCl<sub>3</sub>): δ 171.1, 139.7, 135.8, 124.5, 111.0, 61.5, 54.5, 35.7, 35.6, 23.5, 14.1.

**Diethyl 3,4-dimethyl-5-methylenecyclohex-3-ene-1,1-dicarboxylate (Table 1, entry 4).** (The physical and spectral data were identical to those previously reported).<sup>3</sup> <sup>1</sup>H NMR (400 MHz, CDCl<sub>3</sub>): δ 4.92 (s, 1H), 4.79 (s, 1H), 4.16-4.14 (m, 4H), 2.83 (s, 2H), 2.61 (s, 2H), 1.80 (s, 3H), 1.75 (s, 3H), 1.21 (t, *J* = 7.2 Hz, 6H); <sup>13</sup>C NMR (100 MHz, CDCl<sub>3</sub>): δ 171.1, 141.4, 130.5, 126.3, 109.2, 61.5, 54.2, 38.0, 37.6, 20.3, 14.2, 13.9.

**3,3-Dimethyl-10-methylene-2,4-dioxaspiro[5.5]undec-8-ene (Table 2, entry 1).** (The physical and spectral data were identical to those previously reported).<sup>21</sup> <sup>1</sup>H NMR (400 MHz, CDCl<sub>3</sub>): δ 6.13 (d, *J* = 10.0 Hz, 1H), 5.73-5.67 (m, 1H), 4.89 (s, 1H), 4.86 (s, 1H), 3.57 (s, 4H), 2.26 (t, *J* = 1.2 Hz, 2H), 2.14-2.12 (m, 2H), 1.43 (s, 3H), 1.41 (s, 3H); <sup>13</sup>C-NMR (100 MHz, CDCl<sub>3</sub>): δ 140.0, 129.2, 127.0, 113.5, 98.3, 68.4, 36.3, 31.8, 24.6, 23.2.

**3,3,9-Trimethyl-10-methylene-2,4-dioxaspiro[5.5]undec-8-ene (*endo* product) and 8,8-Dimethyl-2-(prop-1-en-2-yl)-7,9-dioxaspiro[4.5]dec-2-ene (*exo* product) (ratio of *endo* and *exo* product = 66 : 33, Table 2, entry 2).** obtained as a colorless oil. IR (neat): 3079 (w), 2991 (m), 2918 (br), 2856 (m), 1598 (w), 1369 (m), 1194 (m), 1073 (s), 893 (m) cm<sup>-1</sup>; (*endo* product - major) <sup>1</sup>H NMR (400 MHz, CDCl<sub>3</sub>): δ 6.11 (d, *J* = 17.6 Hz, 1H), 5.79-5.74 (m, 1H), 4.92 (s, 2H), 3.62 (s, 4H), 2.39 (s, 2H), 2.21-2.18 (m, 2H), 1.62-1.57 (m, 2H), 1.43 (s, 3H), 1.41 (s, 3H); (*exo* product - minor) <sup>1</sup>H NMR (400 MHz, CDCl<sub>3</sub>): δ 6.36 (dd, *J* = 17.6, 10.8 Hz, 1H), 5.72 (s, 1H), 5.11 (d, *J* = 17.6 Hz, 1H), 4.89 (d, *J* = 17.6 Hz, 1H), 3.63 (d, *J* = 11.6 Hz, 2H), 3.56 (d, *J* = 11.6 Hz, 2H), 2.26-2.19 (m, 2H), 2.07 (d, *J* = 2.0 Hz, 2H), 1.62-1.57 (m, 2H), 1.45 (s, 3H), 1.43 (s, 3H); (*endo* and *exo* product) <sup>13</sup>C NMR (100 MHz, CDCl<sub>3</sub>): δ 143.4, 139.9, 133.3, 133.2, 128.6,

(20) Grigg, R.; Stevenson, P.; Worakun, T. *Tetrahedron*, **1998**, 44, 2033–2036

(21) Kim, H.; Lee, C. *J. Am. Chem. Soc.* **2005**, 127, 10180–10181.

117.2, 113.6, 110.5, 98.4, 98.2, 68.7, 68.6, 68.5, 40.4, 35.3, 34.1, 30.6, 30.2, 27.4, 24.6, 24.2, 23.9, 23.6; HRMS (ESI)  $[M + H]^+$  calcd for  $C_{13}H_{21}O_2$ : 209.1542, found: 209.1551.

**3,3-Dimethyl-8-methylene-2,4-dioxaspiro[5.6]dodec-9-ene (endo product) and 3,3-Dimethyl-8-vinyl-2,4-dioxaspiro[5.5]undec-8-ene (exo product) (ratio of endo and exo product = 75: 25, Table 2, entry 3).** obtained as a colorless oil. IR (neat): 2991 (m), 2924 (m), 2855 (m), 1606 (w), 1369 (m), 1196 (s), 1116 (s), 881 (w), 832 (s)  $cm^{-1}$ ; (endo product - major)  $^1H$  NMR (400 MHz,  $CDCl_3$ ):  $\delta$  5.53 (s, 1H), 4.99 (s, 1H), 4.86 (s, 1H), 3.55 (dd,  $J = 15.6, 11.2$  Hz, 4H), 2.29 (s, 2H), 2.12 (t,  $J = 2.0$  Hz, 2H), 1.81-1.80 (m, 3H), 1.42 (s, 3H), 1.41 (s, 3H); (exo product - minor)  $^1H$  NMR (400 MHz,  $CDCl_3$ ):  $\delta$  5.64 (s, 1H), 4.90 (s, 1H), 4.86 (s, 1H), 3.69 (t,  $J = 1.2$  Hz, 4H), 2.42 (d,  $J = 1.6$  Hz, 2H), 2.38 (s, 2H), 1.91 (s, 3H), 1.45 (s, 3H), 1.44 (s, 3H); (endo and exo product)  $^{13}C$ -NMR (100 MHz,  $CDCl_3$ ):  $\delta$  142.4, 141.4, 140.0, 132.7, 125.3, 124.9, 123.0, 112.9, 110.9, 98.4, 69.7, 68.5, 66.1, 40.9, 40.2, 38.0, 33.1, 32.8, 24.5, 24.2, 22.7, 20.6, 19.4; HRMS (ESI)  $[M + H]^+$  calcd for  $C_{13}H_{21}O_2$ : 209.1542, found: 209.1544.

**3,3,8-Trimethyl-10-methylene-2,4-dioxaspiro[5.5]undec-8-ene (Table 2, entry 4).** obtained as a colorless oil. IR (neat): 3079 (w), 2992 (w), 2923 (br), 2856 (m), 1612 (w), 1381 (m), 1211 (m), 1068 (s), 902 (m)  $cm^{-1}$ ;  $^1H$  NMR (400 MHz,  $CDCl_3$ ):  $\delta$  5.92 (s, 1H), 4.79 (s, 1H), 4.76 (s, 1H), 3.56 (d,  $J = 10.8$  Hz, 2H), 3.54 (d,  $J = 10.8$  Hz, 2H), 2.19 (s, 2H), 2.05 (s, 2H), 1.78 (s, 3H), 1.43 (s, 3H), 1.42 (s, 3H);  $^{13}C$  NMR (100 MHz,  $CDCl_3$ ):  $\delta$  140.6, 135.8, 124.6, 111.0, 98.3, 68.5, 36.8, 36.1, 24.8, 23.8, 23.0; HRMS (ESI)  $[M + H]^+$  calcd for  $C_{13}H_{21}O_2$ : 209.1542, found 209.1540.

**3-Methylene-1-tosyl-1,2,3,6-tetrahydropyridine (17a).** (The physical and spectral data were identical to those previously reported).<sup>11</sup>  $^1H$  NMR (400 MHz,  $CDCl_3$ ):  $\delta$  7.66 (d,  $J = 8.4$  Hz, 2H), 7.29 (d,  $J = 8.0$  Hz, 2H), 6.13 (dt,  $J = 9.2, 1.8$  Hz, 1H), 5.72-5.68 (m, 1H), 4.92 (s, 1H), 4.90 (s, 1H), 3.81 (s, 2H), 3.72-3.71 (m, 2H), 2.41 (s, 3H);  $^{13}C$  NMR (100 MHz,  $CDCl_3$ ):  $\delta$  143.8, 137.0, 133.8, 129.8, 128.0, 127.7, 124.9, 113.2, 48.4, 45.0, 21.7.

**3-Methylene-1-(2-nitrophenylsulfonyl)-1,2,3,6-tetrahydropyridine (17b).** obtained as a colorless viscous oil. IR (neat): 3092 (m), 2903 (m), 2849 (w), 1645 (w), 1543 (s), 1372 (w), 1356 (s), 1166 (s), 1127 (w), 1083 (w), 948 (m), 744 (w), 663 (w), 583 (m), 534 (w)  $cm^{-1}$ ;  $^1H$  NMR (400 MHz,  $CDCl_3$ ):  $\delta$  7.95 (dd,  $J = 7.2, 2.0$  Hz, 1H), 7.70-7.63 (m, 2H), 7.58 (dd,  $J = 7.6, 2.0$  Hz, 1H), 6.19 (dt,  $J = 10.0, 0.9$  Hz, 1H), 5.81-5.79 (m, 1H), 4.97 (s, 1H), 4.92 (s, 1H), 4.09 (t,  $J = 1.2$  Hz, 2H), 4.00-3.99 (m, 2H);  $^{13}C$  NMR (100 MHz,  $CDCl_3$ ):  $\delta$  136.5, 133.9, 132.0, 131.7, 130.9, 127.8, 125.2, 124.2, 113.6, 48.3, 44.9; HRMS (ESI):  $[M + H]^+$  calcd for  $C_{12}H_{13}N_2O_4S$ : 281.0596, found: 281.0606.

**tert-Butyl-5-methylene-5,6-dihydropyridine-1(2H)-carboxylate (17c).** obtained as a colorless oil. IR (neat): 3037 (m), 2833 (w), 1695 (s), 1413 (s), 1366 (w), 1260 (w), 1236 (s), 1167 (s), 1106 (m), 1005 (w), 881 (m), 768 (w)  $cm^{-1}$ ;  $^1H$  NMR (400 MHz,  $CDCl_3$ ):  $\delta$  6.24 (d,  $J = 10.0$  Hz, 1H), 5.80 (br s, 1H), 4.89 (s, 2H), 4.08 (s, 2H), 3.98 (s, 2H), 1.45 (s, 9H);  $^{13}C$  NMR (100 MHz,



CDCl<sub>3</sub>):  $\delta$  155.0, 138.6, 127.5, 123.0, 118.7, 111.7, 80.1, 46.8, 45.5, 43.6, 28.7, 28.2, 22.7; HRMS (ESI): [M + H]<sup>+</sup> calcd for C<sub>11</sub>H<sub>18</sub>NO<sub>2</sub>: 196.1338, found: 196.1347.

**3-Methylene-1-tosyl-2,3,6,7-tetrahydro-1H-azepine (Table 3, entry 1).** A solution of **19** (9.45 mg, 40  $\mu$ mol) in 31.0 mL of C<sub>6</sub>H<sub>6</sub> was used. (Concentration of substrate in the reaction mixture = 1.30  $\mu$ M). IR (neat): 2923 (m), 1597 (w), 1450 (w), 1333 (s), 1153 (s), 1093 (m), 914 (s), 815 (m), 757 (m), 668 (m), 591 (s), 547 (w) cm<sup>-1</sup>; <sup>1</sup>H NMR (400 MHz, CDCl<sub>3</sub>):  $\delta$  7.67 (dt, *J* = 8.4, 1.6 Hz, 2H), 7.24 (d, *J* = 8.0 Hz, 2H), 6.01 (d, *J* = 11.6 Hz, 1H), 5.56 (quin, *J* = 5.6 Hz, 1H), 5.04 (s, 1H), 4.95 (s, 1H), 4.10 (s, 2H), 3.47 (t, *J* = 6.0 Hz, 2H), 2.39 (s, 3H); <sup>13</sup>C NMR (100 MHz, CDCl<sub>3</sub>):  $\delta$  143.3, 143.0, 136.9, 131.6, 129.7, 129.0, 127.5, 118.1, 53.1, 48.8, 29.3, 21.7; HRMS (ESI) [M + H]<sup>+</sup> calcd for C<sub>14</sub>H<sub>18</sub>NO<sub>2</sub>S: 264.1058, found: 264.1047.

**4-Methyl-3-methylene-1-tosyl-1,2,3,6-tetrahydropyridine (endo product) and 3-(Prop-1-en-2-yl)-1-tosyl-2,5-dihydro-1H-pyrrole (exo product) (ratio of endo and exo product = 84 : 16, Table 3, entry 2).** (The physical and spectral data were identical to those previously reported).<sup>22</sup> (*endo* product, major) <sup>1</sup>H NMR (400 MHz, CDCl<sub>3</sub>):  $\delta$  7.65 (d, *J* = 7.6 Hz, 2H), 7.28 (d, *J* = 8.4 Hz, 2H), 5.51 (s, 1H), 4.99 (s, 1H), 4.92 (s, 1H), 3.78 (s, 2H), 3.69 (br s, 2H), 2.40 (s, 3H), 1.72 (s, 3H); (*exo* product - minor) <sup>1</sup>H NMR (400 MHz, CDCl<sub>3</sub>):  $\delta$  7.72 (d, *J* = 8.0 Hz, 2H), 7.31 (d, *J* = 8.4 Hz, 2H), 5.58 (s, 1H), 4.97 (s, 1H), 4.75 (s, 1H), 4.26-4.18 (m, 4H), 2.40 (s, 3H), 1.84 (s, 3H); (*endo* product) <sup>13</sup>C NMR (100 MHz, CDCl<sub>3</sub>):  $\delta$  138.5, 133.5, 132.0, 129.9, 129.6, 128.0, 122.2, 110.5, 49.3, 45.7, 21.6, 18.5; (*exo* product) <sup>13</sup>C NMR (100 MHz, CDCl<sub>3</sub>):  $\delta$  143.6, 139.4, 136.3, 134.2, 129.5, 127.5, 120.7, 114.7, 55.6, 54.5, 21.6, 20.1.

**5-Methyl-3-methylene-1-tosyl-1,2,3,6-tetrahydropyridine (Table 3, entry 3).** A solution of **21** (9.45 mg, 40  $\mu$ mol) in 5.95 ml of C<sub>6</sub>H<sub>6</sub> was used. (Concentration of substrate in the reaction mixture = 6.67  $\mu$ M). (The physical and spectral data were identical to those previously reported).<sup>23</sup> <sup>1</sup>H NMR (400 MHz, CDCl<sub>3</sub>):  $\delta$  7.66 (d, *J* = 8.0 Hz, 2H), 7.30 (d, *J* = 8.4 Hz, 2H), 5.85 (s, 1H), 4.83 (s, 1H), 4.79 (s, 1H), 3.75 (s, 2H), 3.60 (s, 2H), 2.40 (s, 3H), 1.72 (s, 3H); <sup>13</sup>C NMR (100 MHz, CDCl<sub>3</sub>):  $\delta$  143.7, 137.3, 133.7, 129.7, 127.9, 123.6, 113.0, 110.6, 48.5, 48.0, 21.7, 20.7.

**4,5-Dimethyl-3-methylene-1-tosyl-1,2,3,6-tetrahydropyridine (Table 3, entry 4).** A solution of **22** (9.45 mg, 40.0  $\mu$ mol) in 20.0 ml of C<sub>6</sub>H<sub>6</sub> was used. (Concentration of substrate in the reaction mixture = 2.00  $\mu$ M). (The physical and spectral data were identical to those previously reported).<sup>3</sup> <sup>1</sup>H NMR (400 MHz, CDCl<sub>3</sub>):  $\delta$  7.66 (d, *J* = 8.4 Hz, 2H), 7.29 (d, *J* = 8.0 Hz, 2H), 4.93 (s, 1H), 4.83 (s, 1H), 3.76 (s, 2H), 3.59 (s, 2H), 2.41 (s, 3H), 1.68 (s, 3H), 1.66 (s, 3H); <sup>13</sup>C NMR (100 MHz, CDCl<sub>3</sub>):  $\delta$  148.4, 143.7, 139.1, 129.7, 128.5, 128.1, 126.1, 108.8, 50.3, 49.9, 21.7, 17.6, 13.3.

(21) Sashuk, V.; Grela, K. *J. Mol. Cat. A: Chemical* **2006**, *257*, 59–66.

(23) Lee, C-W.; Oh, K. S.; Kim, K. S.; Ahn, K. H. *Org. Lett.* **2000**, *2*, 1213–1216.

**5-Methylene-1-tosyl-2,5-dihydro-1H-benzo[b]azepine (25).** obtained as a colorless viscous oil. IR (neat): 3062 (w), 2921 (m), 1649 (w), 1341 (s), 1157 (s), 678 (s)  $\text{cm}^{-1}$ ;  $^1\text{H}$  NMR (400 MHz,  $\text{CDCl}_3$ ):  $\delta$  7.49-7.43 (m, 3H), 7.37-7.23 (m, 3H), 7.09 (d,  $J = 8.0$  Hz, 2H), 5.95 (d,  $J = 12.0$  Hz, 1H), 5.53 (dt,  $J = 11.6, 4.0$  Hz, 1H), 4.90 (s, 1H), 4.75 (s, 1H), 4.44 (br s, 2H), 2.37 (s, 3H);  $^{13}\text{C}$  NMR (100 MHz,  $\text{CDCl}_3$ ):  $\delta$  143.6, 143.1, 140.7, 137.5, 137.0, 131.4, 129.8, 129.3, 129.2, 129.2, 129.0, 128.3, 126.0, 121.6, 49.4, 21.7; HRMS (ESI)  $[\text{M} + \text{H}]^+$  calcd for  $\text{C}_{18}\text{H}_{18}\text{NO}_2\text{S}$ : 312.1058, found: 312.1052.

**3-Methylene-1-tosyl-2,3-dihydro-1H-benzo[b]azepine (endo product, 29) and 1-Tosyl-3-vinyl-1,2-dihydro-quinoline (exo product, 30) (ratio of endo and exo product = 62 : 38).** A solution of **27** (12.5 mg, 40  $\mu\text{M}$ ) in 20.0 ml of  $\text{C}_6\text{H}_6$  was used. (Concentration of substrate in the reaction mixture = 20.0  $\mu\text{M}$ ). IR (neat): 2924 (m), 1598 (w), 1351 (m), 1165 (s), 678 (m)  $\text{cm}^{-1}$ ; (*endo* product - major)  $^1\text{H}$  NMR (400 MHz,  $\text{CDCl}_3$ ):  $\delta$  7.71 (d,  $J = 8.0$  Hz, 1H), 7.36-7.35 (m, 3H), 7.26-7.23 (m, 2H), 6.97 (d,  $J = 8.8$  Hz, 2H), 6.93 (d,  $J = 7.6$  Hz, 1H), 6.07 (d,  $J = 16.4$  Hz, 1H), 5.85 (d,  $J = 17.6$  Hz, 1H), 5.82 (d,  $J = 16.4$  Hz, 1H), 4.51 (s, 2H), 2.33 (s, 3H); (*exo* product - minor)  $^1\text{H}$  NMR (400 MHz,  $\text{CDCl}_3$ ):  $\delta$  7.74 (d,  $J = 7.6$  Hz, 1H), 7.38-7.34 (m, 2H), 7.31-7.15 (m, 4H), 7.01 (d,  $J = 8.8$  Hz, 2H), 6.16 (dd,  $J = 17.6, 10.8$  Hz, 1H), 5.40 (d,  $J = 17.6$  Hz, 1H), 5.21 (d,  $J = 10.8$  Hz, 1H), 4.55 (s, 2H), 2.32 (s, 3H); (*endo* and *exo* product)  $^{13}\text{C}$  NMR (100 MHz,  $\text{CDCl}_3$ ):  $\delta$  143.8, 146.8, 143.5, 141.5, 135.8, 135.4, 134.6, 133.5, 130.6, 129.0, 129.0, 128.4, 128.1, 127.6, 127.1, 127.0, 126.9, 126.6, 126.3, 125.6, 124.7, 123.3, 114.9, 45.2, 44.7, 28.9, 21.7; HRMS (ESI)  $[\text{M} + \text{H}]^+$  calcd for  $\text{C}_{18}\text{H}_{18}\text{NO}_2\text{S}$ : 312.1058, found: 312.1050.

**Representative procedure for Mo-catalyzed enyne ring-closing metathesis reactions for the synthesis of O-heterocyclic dienes (Table 4, entry 2).** In an  $\text{N}_2$ -filled glove box, a 4 mL vial with magnetic stir bar was charged with a solution of **5** (0.02 M solution in  $\text{C}_6\text{H}_6$ , 125  $\mu\text{L}$ , 2.5  $\mu\text{mol}$ ), a solution of **31** (8.6 mg, 50  $\mu\text{mol}$ ) in 1.13 mL of  $\text{C}_6\text{H}_6$  was added. The mixture was allowed to stir at 22  $^\circ\text{C}$  for 10 h, after which time the reaction was quenched by exposure to air. The mixture was concentrated to afford a brown residue, which was purified by silica gel column chromatography to afford **32** (4.0 mg, 23  $\mu\text{mol}$ , 46% yield) as colorless oil. IR (neat): 3032 (m), 1604 (w), 1087 (s), 699 (s)  $\text{cm}^{-1}$ ;  $^1\text{H}$  NMR (400 MHz,  $\text{CDCl}_3$ ):  $\delta$  7.39-7.28 (m, 5H), 6.39 (dt,  $J = 10.4, 2.0$  Hz, 1H), 5.92 (d,  $J = 9.6$  Hz, 1H), 5.19 (s, 1H), 5.00 (s, 1H), 4.53 (s, 1H), 4.31 (dt,  $J = 17.6, 2.4$  Hz, 1H), 4.18 (d,  $J = 17.6$  Hz, 1H);  $^{13}\text{C}$  NMR (100 MHz,  $\text{CDCl}_3$ ):  $\delta$  141.8, 139.3, 128.6, 128.4, 128.2, 128.1, 127.0, 113.3, 79.0, 64.0; HRMS (ESI)  $[\text{M} + \text{H}]^+$  calcd for  $\text{C}_{12}\text{H}_{13}\text{O}$ : 173.0966, found: 173.0967.

**3-Methylene-6-phenyl-3,6-dihydro-2H-pyran (35).** obtained as a colorless oil. IR (neat): 2920 (s), 2850 (m), 1736 (w), 1070 (m), 700 (m)  $\text{cm}^{-1}$ ;  $^1\text{H}$  NMR (400 MHz,  $\text{CDCl}_3$ ):  $\delta$  7.39-7.26 (m, 5H), 6.41 (dd,  $J = 10.0, 2.4$  Hz, 1H), 5.96 (dd,  $J = 10.0, 1.2$  Hz, 1H), 5.23 (s, 1H), 4.94 (s, 1H), 4.89 (s, 1H), 4.42 (d,  $J = 13.6$  Hz, 1H), 4.35 (dt,  $J = 13.2, 1.6$  Hz, 1H);  $^{13}\text{C}$  NMR (100 MHz,  $\text{CDCl}_3$ ):  $\delta$  140.5, 138.9, 131.4, 128.6, 128.2, 127.7, 127.0, 110.3, 76.2, 67.5; HRMS (ESI)  $[\text{M} + \text{H}]^+$  calcd for  $\text{C}_{12}\text{H}_{13}\text{O}$ : 173.0966, found: 173.0964.

**2,2-Dimethyl-5-methylene-6-phenyl-5,6-dihydro-2H-1,2-oxasiline (40).** obtained as a colorless oil. IR (neat): 2958 (w), 1552 (m), 1453 (w), 1250 (m), 1079 (m)  $\text{cm}^{-1}$ ;  $^1\text{H}$  NMR (400 MHz,  $\text{CDCl}_3$ ):  $\delta$  7.42-7.26 (m, 5H), 7.16 (d,  $J = 14.4$  Hz, 1H), 5.98 (d,  $J = 14.4$  Hz, 1H), 5.57 (s, 1H), 5.12 (s, 1H), 4.67 (d,  $J = 1.6$  Hz, 1H), 0.27 (s, 3H), 0.12 (s, 3H);  $^{13}\text{C}$  NMR (100 MHz,  $\text{CDCl}_3$ ):  $\delta$  147.6, 146.7, 142.2, 129.7, 128.3, 128.1, 127.7, 119.3, 76.5, -0.3, -0.4; HRMS (ESI)  $[\text{M} + \text{H}]^+$  calcd for  $\text{C}_{13}\text{H}_{17}\text{OSi}$ : 217.1049, found: 217.1043.

**2-Methyl-5-methylene-2,6-diphenyl-5,6-dihydro-2H-1,2-oxasiline (42) (mixture of two diastereomers, dr = 60 : 40).** obtained as a colorless oil. IR (neat): 2998 (w), 1550 (m), 1428 (m), 1115 (m), 1079 (m), 696 (s)  $\text{cm}^{-1}$ ;  $^1\text{H}$  NMR (400 MHz,  $\text{CDCl}_3$ ):  $\delta$  7.65-7.63 (m, 1H), 7.57-7.55 (m, 1H), 7.43-7.26 (m, 8H), 6.14 (d,  $J = 14.0$  Hz, 0.6H), 6.08 (d,  $J = 14.4$  Hz, 0.4H), 5.70 (s, 0.4H), 5.62 (s, 0.6H), 5.19 (s, 0.6H), 5.17 (s, 0.4H), 4.73 (s, 0.6H), 4.68 (s, 0.4H), 0.58 (s, 1.2 H), 0.41 (s, 1.8 H);  $^{13}\text{C}$  NMR (100 MHz,  $\text{CDCl}_3$ ):  $\delta$  149.0, 148.9, 146.9, 146.6, 142.0, 141.8, 136.6, 136.0, 134.2, 134.1, 130.2, 130.1, 129.5, 129.0, 128.3, 128.2, 128.1, 127.9, 127.8, 127.8, 127.8, 127.4, 119.9, 119.8, 76.6, 76.6, -1.9, -2.1; HRMS (ESI)  $[\text{M}]^+$  calcd for  $\text{C}_{18}\text{H}_{18}\text{OSi}$ : 278.1127, found: 278.1117.

**Ethyl 5-methylenecyclohex-3-enecarboxylate (51).** In an  $\text{N}_2$ -filled glove box, a 4-mL vial with magnetic stir bar was charged with a solution of **38a** in  $\text{C}_6\text{H}_6$  (0.01 M, 500  $\mu\text{L}$ , 5.0  $\mu\text{mol}$ ), a solution of **51** (16.2 mg, 100  $\mu\text{mol}$ ) in 500  $\mu\text{L}$   $\text{C}_6\text{H}_6$  was added. The mixture was allowed to stir at 22  $^\circ\text{C}$  for 0.5 h, after which the reaction was quenched by exposure to air. The mixture was concentrated to afford a brown residue, which was purified by silica gel column chromatography to afford **52** (12.2 mg, 75.2  $\mu\text{mol}$ , 75% yield) as a colorless oil. IR (neat): 2976 (br), 1733 (s), 1620 (w), 1170 (m)  $\text{cm}^{-1}$ ;  $^1\text{H}$  NMR (400 MHz,  $\text{CDCl}_3$ ):  $\delta$  6.16 (d,  $J = 9.6$  Hz, 1H), 5.81 (quin,  $J = 4.8$  Hz, 1H), 4.86 (s, 1H), 4.84 (s, 1H), 4.15 (q,  $J = 7.2$  Hz, 2H), 2.68-2.62 (m, 2H), 2.51-2.44 (m, 1H), 2.38-2.34 (m, 2H), 1.26 (t,  $J = 7.2$  Hz, 3H);  $^{13}\text{C}$  NMR (100 MHz,  $\text{CDCl}_3$ ):  $\delta$  175.2, 141.4, 129.5, 128.2, 112.4, 60.7, 39.9, 33.2, 28.0, 14.5; HRMS (ESI)  $[\text{M} + \text{H}]^+$  calcd for  $\text{C}_{10}\text{H}_{15}\text{O}_2$ : 167.1072, found: 167.1072.

## Ru-Catalyzed Enyne Ring-Closing Metathesis Reactions

**Representative procedure for Ru-catalyzed enyne ring-closing metathesis reactions. Diethyl 3-vinylcyclopent-3-ene-1,1-dicarboxylate (3).** A 4-mL vial with magnetic stir bar was charged with **7** (2.51 mg, 4.00  $\mu\text{mol}$ ) and 100  $\mu\text{L}$  of  $\text{C}_6\text{H}_6$ . Under nitrogen, a solution of **1** (19.1 mg, 80.0  $\mu\text{mol}$ ) in 2.00 mL of  $\text{C}_6\text{H}_6$  was added dropwise over 5 min and the resulting mixture was allowed to stir at 22  $^\circ\text{C}$  for 2 h. The mixture was concentrated and the resulting brown oil was purified by silica gel chromatography to afford **3** (12.4 mg, 52.0  $\mu\text{mol}$ , 65% yield) as colorless oil. The physical and spectral data were identical to those previously reported.<sup>24</sup>  $^1\text{H}$  NMR (400 MHz,  $\text{CDCl}_3$ ):  $\delta$  6.48 (dd,  $J = 17.6, 10.4$  Hz, 1H), 5.58-5.57 (m, 1H), 5.12 (d,  $J = 6.0$  Hz, 1H), 5.08 (s,

(23) Fürstner, A.; Stelzer, F.; Szillat, H. *J. Am. Chem. Soc.* **2001**, *123*, 11863-11869.

1H), 4.20 (q,  $J = 7.2$  Hz, 4H), 3.12 (d,  $J = 1.2$  Hz, 2H), 3.10 (s, 2H), 1.26 (t,  $J = 7.2$  Hz, 6H);  $^{13}\text{C}$  NMR (100 MHz,  $\text{CDCl}_3$ ):  $\delta$  172.3, 140.3, 132.7, 127.2, 115.2, 61.9, 59.0, 41.0, 39.4, 14.3.

**1-Tosyl-4-vinyl-1,2-dihydroquinoline (26).** obtained as colorless viscous oil. IR (neat): 2921 (m), 1642 (w), 1351 (m), 1164 (s), 680 (m)  $\text{cm}^{-1}$ ;  $^1\text{H}$  NMR (400 MHz,  $\text{CDCl}_3$ ):  $\delta$  7.73 (d,  $J = 8.0$  Hz, 1H), 7.35-7.31 (m, 1H), 7.28-7.22 (m, 4H), 7.04 (d,  $J = 8.0$  Hz, 2H), 6.11 (dd,  $J = 17.6, 11.2$  Hz, 1H), 5.56 (td,  $J = 4.8, 1.2$  Hz, 1H), 5.11 (d,  $J = 17.6$ , 1H), 5.00 (d,  $J = 10.2$ , 1H), 4.39 (d,  $J = 4.8$  Hz, 2H), 2.30 (s, 3H);  $^{13}\text{C}$  NMR (100 MHz,  $\text{CDCl}_3$ ):  $\delta$  143.6, 143.1, 140.7, 137.5, 137.0, 131.4, 129.8, 129.3, 129.2, 129.2, 129.0, 128.3, 126.0, 121.6, 49.4, 21.7; HRMS (ESI)  $[\text{M} + \text{H}]^+$  calcd for  $\text{C}_{18}\text{H}_{18}\text{NO}_2\text{S}$ : 312.1058, found: 312.1053.

**2-Phenyl-3-vinyl-2,5-dihydrofuran (33).** obtained as colorless viscous oil. IR (neat): 3030 (w), 2847 (m), 1596 (w), 1082 (s), 698 (s)  $\text{cm}^{-1}$ ;  $^1\text{H}$  NMR (400 MHz,  $\text{CDCl}_3$ ):  $\delta$  7.39-7.31 (m, 5H), 6.43 (dd,  $J = 17.6, 10.8$  Hz, 1H), 6.10 (s, 1H), 5.83 (t,  $J = 2.0$  Hz, 1H), 5.03 (d,  $J = 11.2$  Hz, 1H), 4.92-4.86 (m, 1H), 4.87 (d,  $J = 17.6$  Hz, 1H), 4.76 (d,  $J = 15.2$  Hz, 1H);  $^{13}\text{C}$  NMR (100 MHz,  $\text{CDCl}_3$ ):  $\delta$  141.2, 140.4, 129.0, 128.7, 128.4, 127.7, 126.6, 117.7, 87.5, 75.0; HRMS (ESI)  $[\text{M} + \text{H}]^+$  calcd for  $\text{C}_{12}\text{H}_{13}\text{O}$ : 173.0966, found: 173.0964.

**2-Phenyl-4-vinyl-2,5-dihydrofuran (36).** (The physical and spectral data were identical to those previously reported).<sup>11</sup>  $^1\text{H}$  NMR (400 MHz,  $\text{CDCl}_3$ ):  $\delta$  7.38-7.26 (m, 5H), 6.56 (dd,  $J = 17.6, 10.8$  Hz, 1H), 5.85 (br s, 2H), 5.24 (d,  $J = 10.4$  Hz, 1H), 5.10 (d,  $J = 17.6$  Hz, 1H), 5.04-4.99 (m, 1H), 4.88 (d,  $J = 11.6$  Hz, 1H);  $^{13}\text{C}$  NMR (100 MHz,  $\text{CDCl}_3$ ):  $\delta$  142.0, 138.8, 129.5, 128.7, 128.5, 128.0, 126.6, 117.1, 88.5, 74.6.

## ■ Enantioselective Ring-Closing Metathesis Reactions of *N*-Containing Eienynes

**Procedure for enantioselective ring-closing metathesis reaction of dienyne 43 (45).** In an  $\text{N}_2$ -filled glove box, a 4-mL vial with magnetic stir bar was charged with a 0.02 M solution of Mo complex **44b** in  $\text{C}_6\text{H}_6$  (250  $\mu\text{L}$ , 5.00  $\mu\text{mol}$ ) generated *in-situ*<sup>15</sup> and 500  $\mu\text{L}$  of  $\text{C}_6\text{H}_6$ . The vial was capped with septa and sealed with electrical tape, then brought out of the glove box and a balloon of ethylene attached. A solution of **43** (12.9 mg, 50.0  $\mu\text{mol}$ ) in 500  $\mu\text{L}$  of  $\text{C}_6\text{H}_6$  was added in one portion and the resulting mixture allowed to stir at 22  $^\circ\text{C}$  under ethylene for 2 h. The reaction was quenched by exposure to air and concentrated *in vacuo* to afford a brown residue, which was purified by silica gel column chromatography to afford desired product **45** (8.11 mg, 31.5  $\mu\text{mol}$ , 63 % yield) as a white solid. M.p. = 96 – 99  $^\circ\text{C}$ ; IR (neat): 2922 (m), 1637 (w), 1343 (s), 1161 (s), 668 (m)  $\text{cm}^{-1}$ ;  $^1\text{H}$  NMR (400 MHz,  $\text{CDCl}_3$ ):  $\delta$  7.64 (d,  $J = 8.0$  Hz, 2H), 7.19 (d,  $J = 8.0$  Hz, 2H), 6.05 (dd,  $J = 10.0, 0.8$  Hz, 1H), 5.88-5.80 (m, 1H), 5.61 (dd,  $J = 10.0, 4.8$  Hz, 1H), 5.24 (dt,  $J = 10.6, 1.2$  Hz, 1H), 5.21 (dt,  $J = 17.6, 1.2$  Hz, 1H), 4.87 (s, 1H), 4.86 (s, 1H), 4.79 (s, 1H), 4.35 (d,  $J = 16.0$  Hz, 1H), 3.82 (d,  $J = 16.0$  Hz, 1H), 2.39 (s, 3H);  $^{13}\text{C}$  NMR (100 MHz,  $\text{CDCl}_3$ ):  $\delta$  143.1, 137.1, 136.1, 134.5, 129.3, 128.2, 127.5, 126.7, 118.2, 113.2, 54.9, 44.0, 21.5; HRMS (ESI)  $[\text{M} + \text{H}]^+$  calcd for  $\text{C}_{15}\text{H}_{18}\text{N}_1\text{O}_2\text{S}_1$ : 276.1058, found: 276.1048; Optical Rotation:  $[\alpha]_{\text{D}}^{20}$   $-24.9$  ( $c = 0.40$ ,  $\text{CHCl}_3$ ) for an enantiomerically enriched sample of 85:15 er (70% ee).

The enantiomeric ratio was determined by HPLC analysis in comparison with authentic racemic materials (Chiralpak AS, hexane:2-propanol = 99:1.0, flow rate = 1.0 mL/min, 23 °C,  $\lambda$  = 254 nm, retention times; (minor) 39.59 min, (major) 56.90 min, 85:15 er).

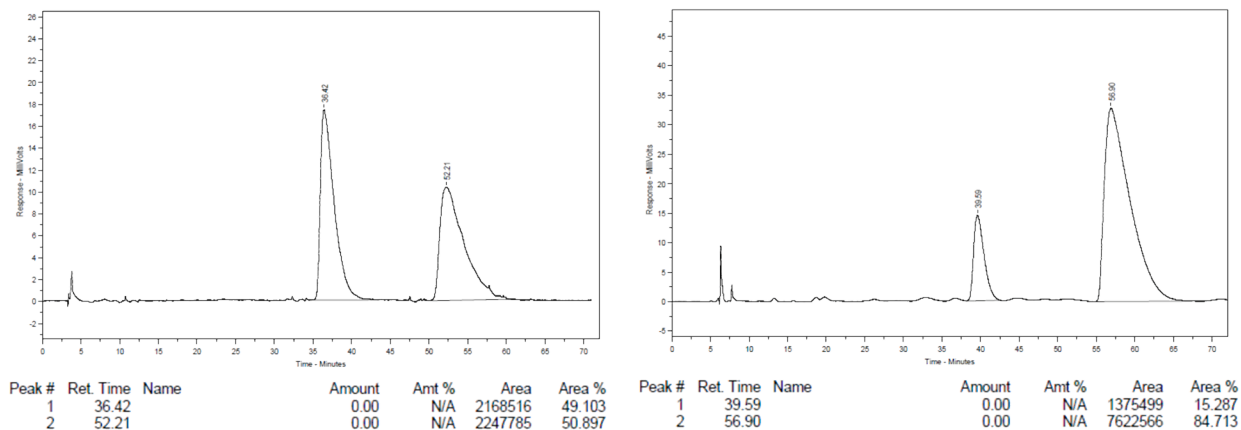

***N*-(2,4-Dimethylpenta-1,4-dien-3-yl)-4-methyl-*N*-(2-methylenebut-3-enyl)benzenesulfonamide (48).** This compound was prepared in analogous fashion to **45** starting from **47** (15.2 mg, 50.0  $\mu$ mol). Purification by silica gel column chromatography afforded **48** (11.5 mg, 35.0  $\mu$ mol, 70% yield) as a colorless viscous oil. IR (neat): 2919 (m), 1649 (w), 1340 (s), 1159 (s), 904 (m), 662 (m)  $\text{cm}^{-1}$ ;  $^1\text{H}$  NMR (400 MHz,  $\text{CDCl}_3$ ):  $\delta$  7.69 (d,  $J$  = 8.4 Hz, 2H), 7.24 (d,  $J$  = 8.4 Hz, 2H), 6.33 (dd,  $J$  = 18.0, 11.2 Hz, 1H), 5.32 (s, 1H), 5.16 (s, 1H), 5.09 (d,  $J$  = 18.0 Hz, 1H), 5.00 (d,  $J$  = 11.2 Hz, 1H), 4.86 (s, 2H), 4.81 (s, 1H), 4.65 (s, 2H), 4.08 (s, 2H), 2.41 (s, 3H), 1.66 (s, 6H);  $^{13}\text{C}$  NMR (100 MHz,  $\text{CDCl}_3$ ):  $\delta$  143.1, 140.7, 137.0, 136.7, 134.8, 129.1, 127.6, 125.6, 115.7, 110.4, 61.9, 43.7, 21.6, 21.2; HRMS (ESI)  $[\text{M} + \text{H}]^+$  calcd for  $\text{C}_{19}\text{H}_{26}\text{N}_1\text{O}_2\text{S}_1$ : 332.1684, found: 332.1686.

**5-Methyl-3-methylene-6-(prop-1-en-2-yl)-1-tosyl-1,2,3,6-tetrahydropyridine (49).** In an  $\text{N}_2$ -filled glove box, a 4-mL vial with magnetic stir bar was charged with **48** (9.90 mg, 30.0  $\mu$ mol).  $\text{C}_6\text{H}_6$  (680  $\mu$ L), followed by a solution of **44a** in  $\text{C}_6\text{H}_6$  (0.02 M, 75.0  $\mu$ L, 1.50  $\mu$ mol) was added. The mixture was allowed to stir at 22 °C for 6 h, after which time the reaction was quenched by exposure to air. The mixture was concentrated to afford a brown residue, which was purified by silica gel column chromatography to afford **49** (8.4 mg, 27.7  $\mu$ mol, 92% yield) as a white solid. M.p. = 94 – 96 °C; IR (neat): 2922 (w), 1648 (w), 1344 (m), 1158 (s), 669 (m)  $\text{cm}^{-1}$ ;  $^1\text{H}$  NMR (400 MHz,  $\text{CDCl}_3$ ):  $\delta$  7.60 (d,  $J$  = 8.4 Hz, 2H), 7.16 (d,  $J$  = 8.4 Hz, 2H), 5.67 (s, 1H), 5.05 (t,  $J$  = 1.6 Hz, 1H), 4.72 (d,  $J$  = 4.0 Hz, 2H), 4.58 (s, 1H), 4.47 (s, 1H), 4.29 (d,  $J$  = 16.8 Hz, 1H), 3.80 (d,  $J$  = 16.8 Hz, 1H), 2.38 (s, 3H), 1.91 (s, 3H), 1.57 (s, 3H);  $^{13}\text{C}$  NMR (100 MHz,  $\text{CDCl}_3$ ):  $\delta$  143.2, 140.8, 137.1, 136.8, 134.9, 129.2, 127.6, 125.6, 115.7, 110.5, 62.0, 43.7, 30.0, 21.7, 21.3; HRMS (ESI)  $[\text{M} + \text{H}]^+$  calcd for  $\text{C}_{17}\text{H}_{22}\text{NO}_2\text{S}$ : 304.1371, found: 304.1369; Optical Rotation:  $[\alpha]_{\text{D}}^{20}$  +5.0 ( $c$  = 0.40,  $\text{CHCl}_3$ ) for an enantiomerically enriched sample of 98:2 er (96% ee).

The enantiomeric ratio was determined by HPLC analysis in comparison with authentic racemic materials (Chiralpak AS, hexane:2-propanol = 99:1.0, flow rate = 1.0 mL/min, 23 °C,  $\lambda$  = 254 nm, retention times; (minor) 15.96 min, (major) 22.42 min, 98:2 er).

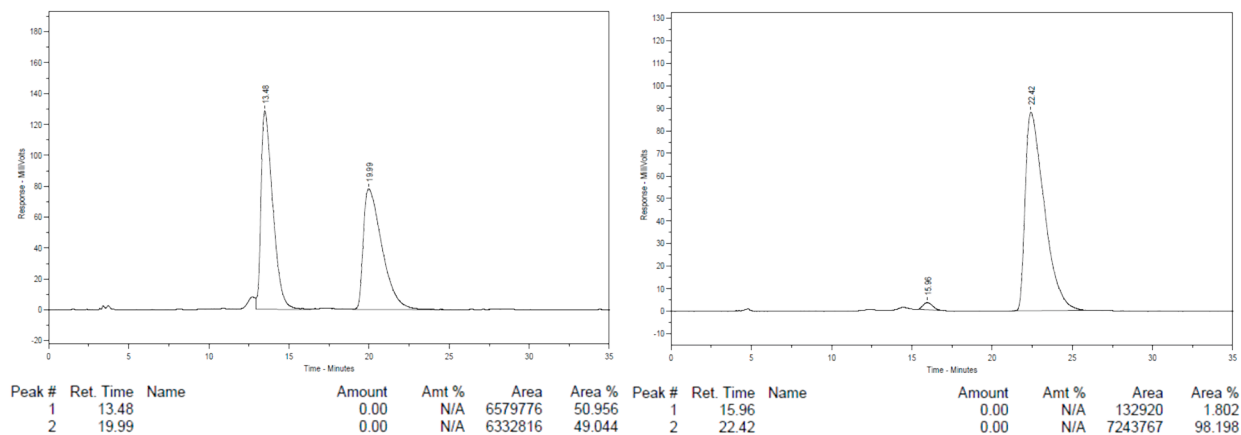

**Procedure for site-selective epoxidation of 17a (eq 4).** A round bottom flask was charged with **17a** (50.0 mg, 200  $\mu$ mol) and 0.25 mL of THF. An aqueous solution of Na-EDTA (0.4  $\mu$ M, 1.00 ml) was added followed by trifluoroacetone (0.20ml, 2.23 mmol). The mixture was allowed to cool to 0°C, then sodium bicarbonate (130 mg, 1.55 mmol) and oxone® (307 mg, 1.00 mmol) was added. The resulting mixture was allowed to stir for 5 min at 0 °C, and 15 min at 22 °C. The mixture was diluted with dichloromethane (5.00 mL), washed with water (2.00 ml x 2) and brine (2.00 mL), dried over anhydrous magnesium sulfate, filtered and concentrated *in vacuo*. The resulting residue was purified by silica gel column chromatography to afford the product (52.0 mg, 196  $\mu$ mol, 98% yield) as a white solid. M.p. = 110–115 °C; IR (neat): 1597 (w), 1343 (s), 1164 (s), 670 (m)  $\text{cm}^{-1}$ ;  $^1\text{H}$  NMR (400 MHz,  $\text{CDCl}_3$ ):  $\delta$  7.68 (d,  $J$  = 8.4 Hz, 2H), 7.33 (d,  $J$  = 8.4 Hz, 2H), 6.02 (dt,  $J$  = 10.4, 3.6 Hz, 1H), 5.35 (dt,  $J$  = 8.0, 2.4 Hz, 1H), 3.80 (dt,  $J$  = 17.7, 2.4 Hz, 1H), 3.67 (dt,  $J$  = 17.2, 2.8 Hz, 1H), 3.41 (d,  $J$  = 12.8 Hz, 1H), 3.22 (d,  $J$  = 12.8 Hz, 1H), 2.96 (d,  $J$  = 4.4 Hz, 1H), 2.83 (d,  $J$  = 4.4 Hz, 1H), 2.43 (s, 3H);  $^{13}\text{C}$  NMR (100 MHz,  $\text{CDCl}_3$ ):  $\delta$  144.1, 133.7, 130.4, 129.9, 127.9, 127.1, 54.3, 53.9, 49.0, 44.6, 21.7; HRMS (ESI)  $[\text{M}+\text{H}]^+$  calcd for  $\text{C}_{13}\text{H}_{16}\text{NO}_3\text{S}$ : 266.0851, found: 266.0853.

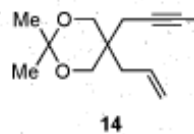

LV3-III-178

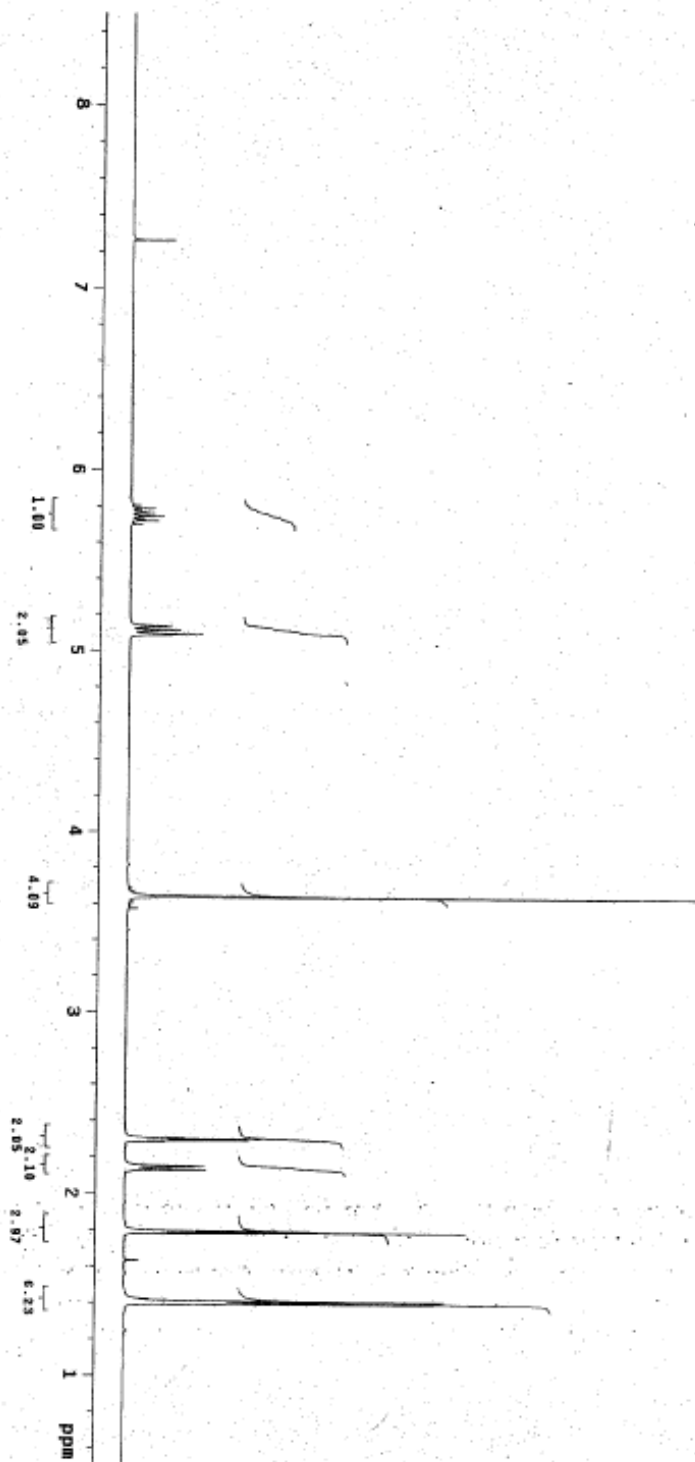

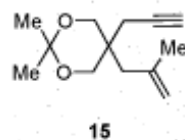

003-III-C&V

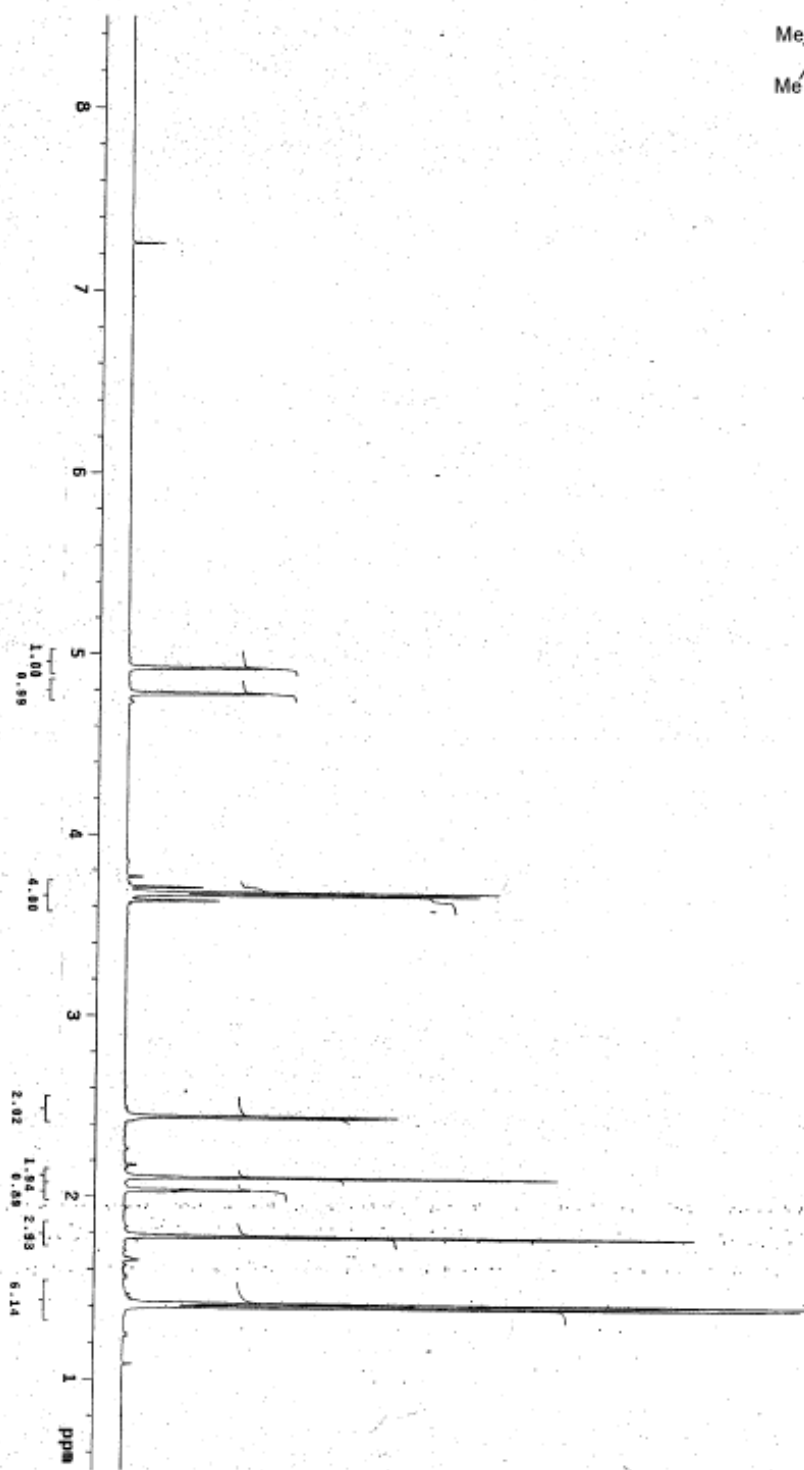



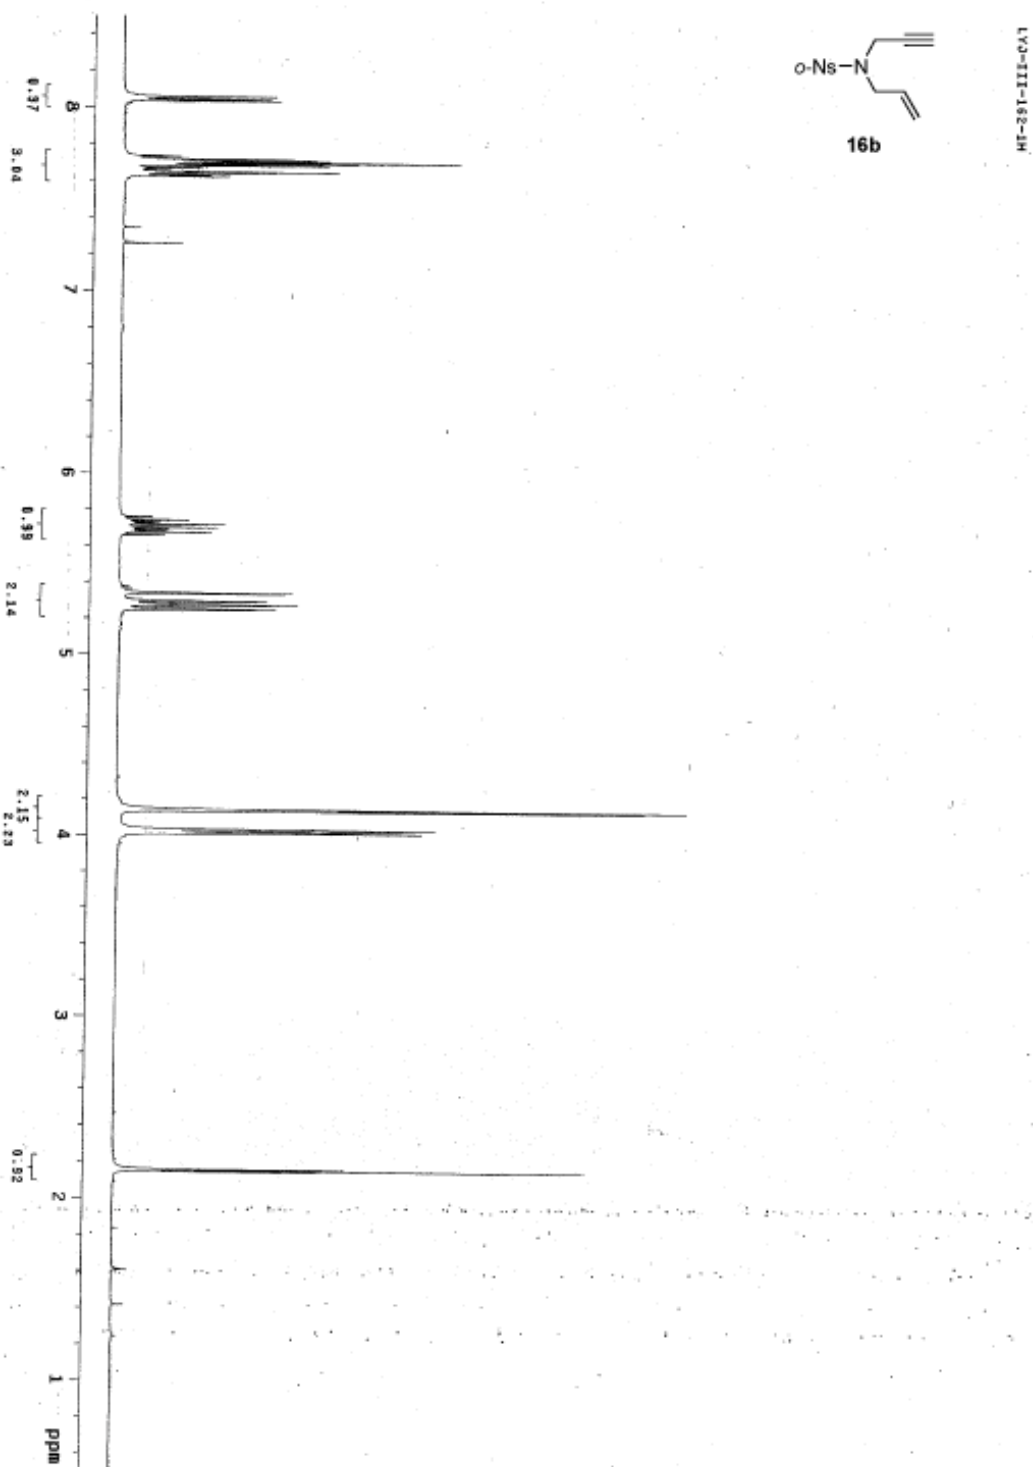

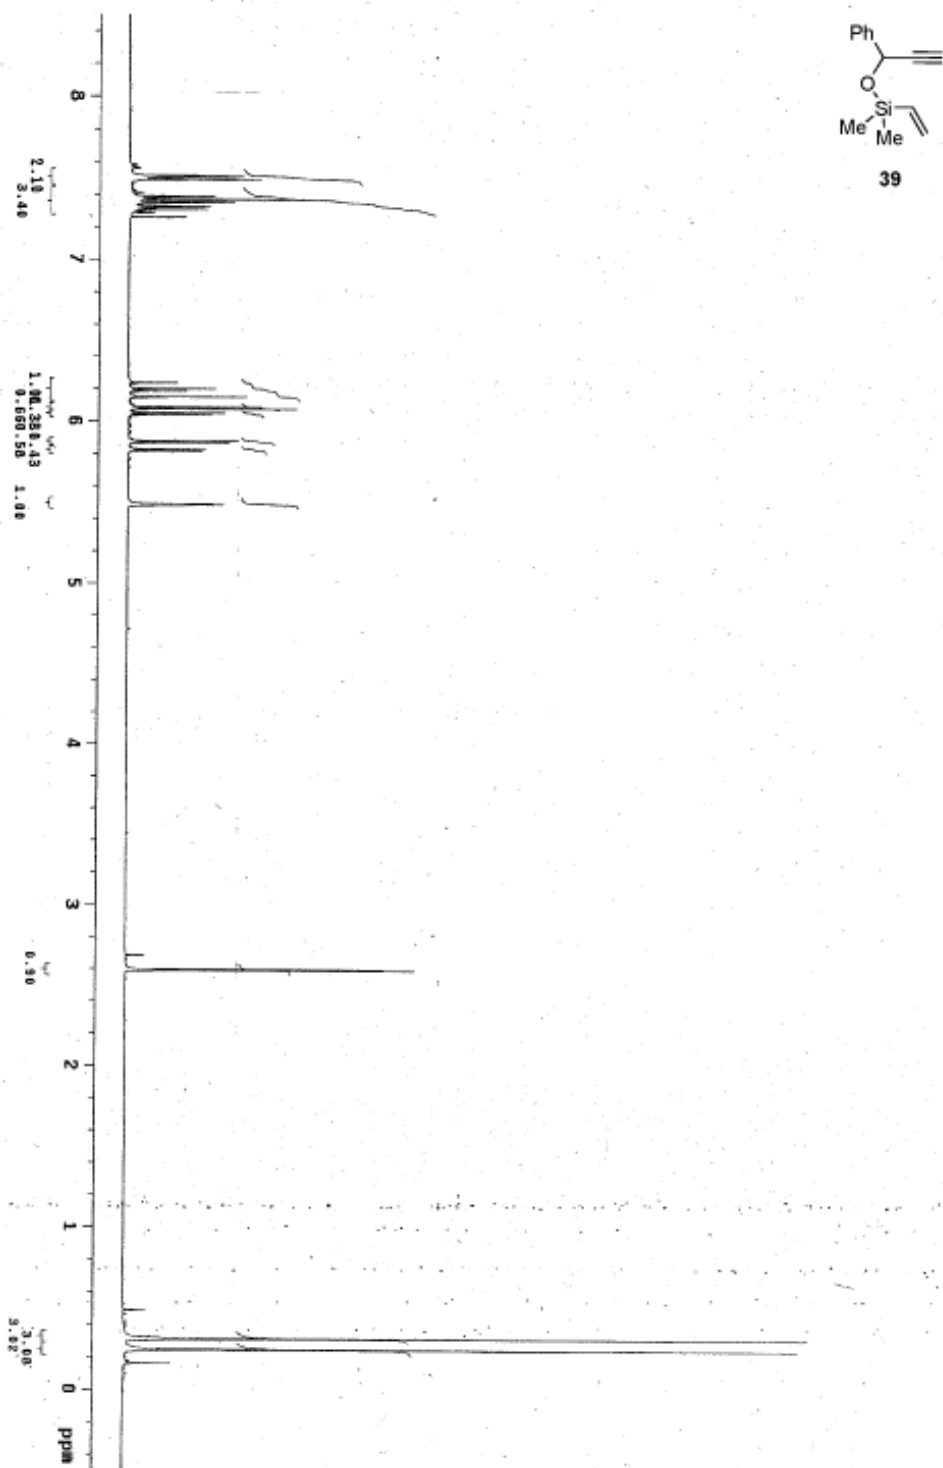

LVC-II-913-02

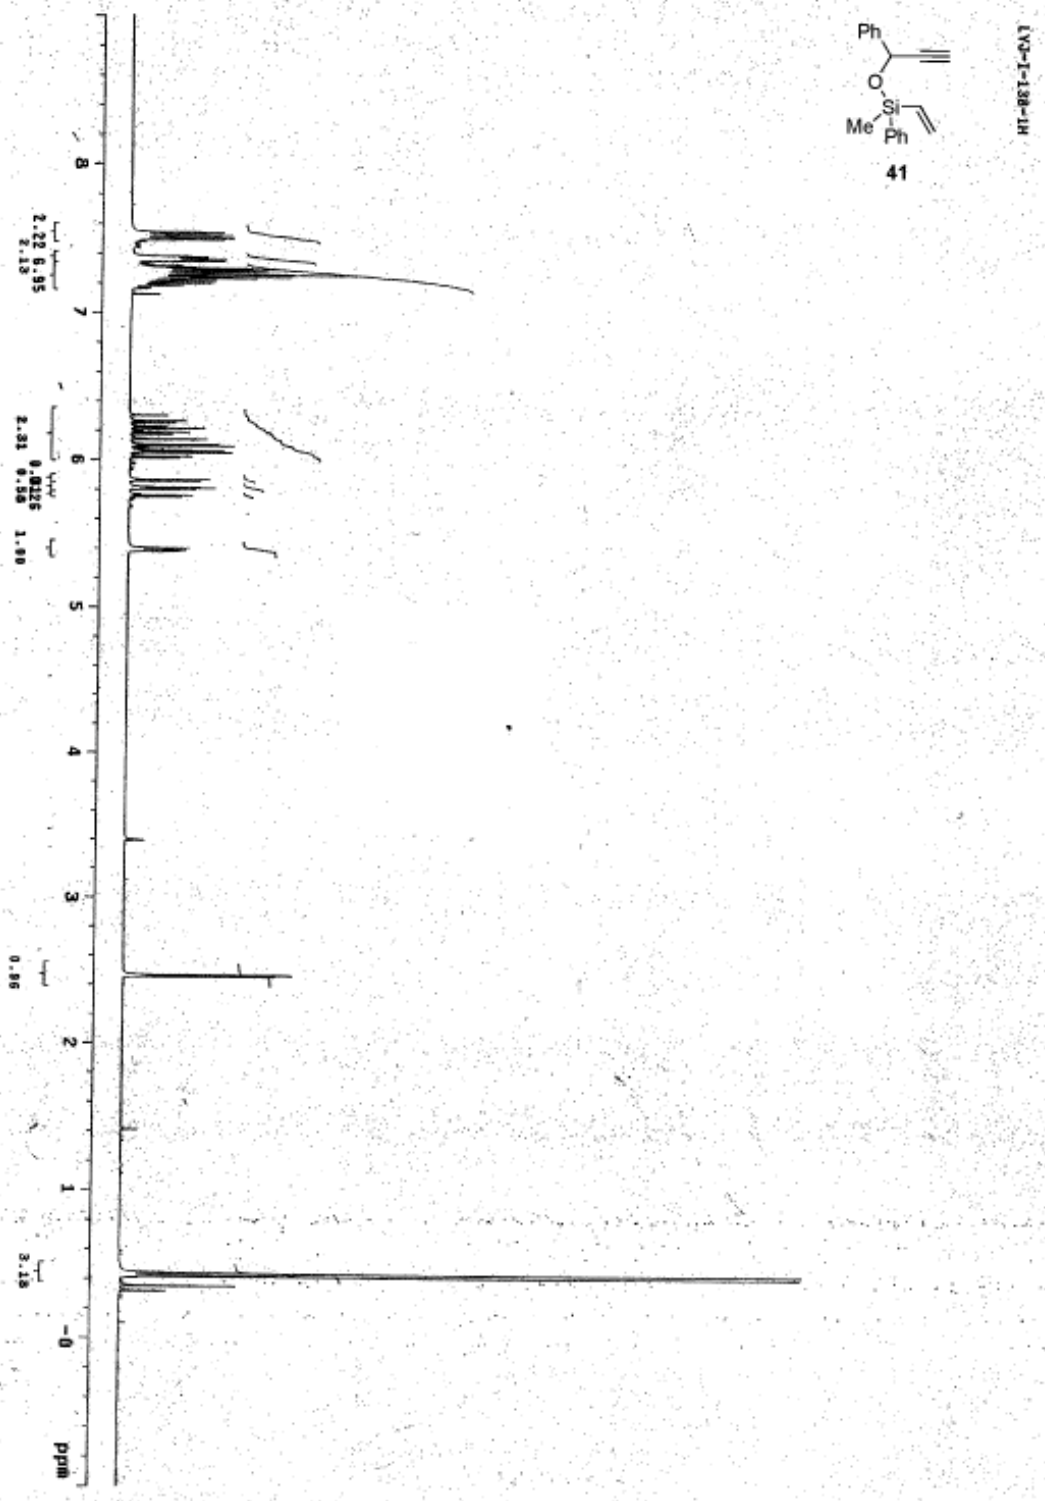

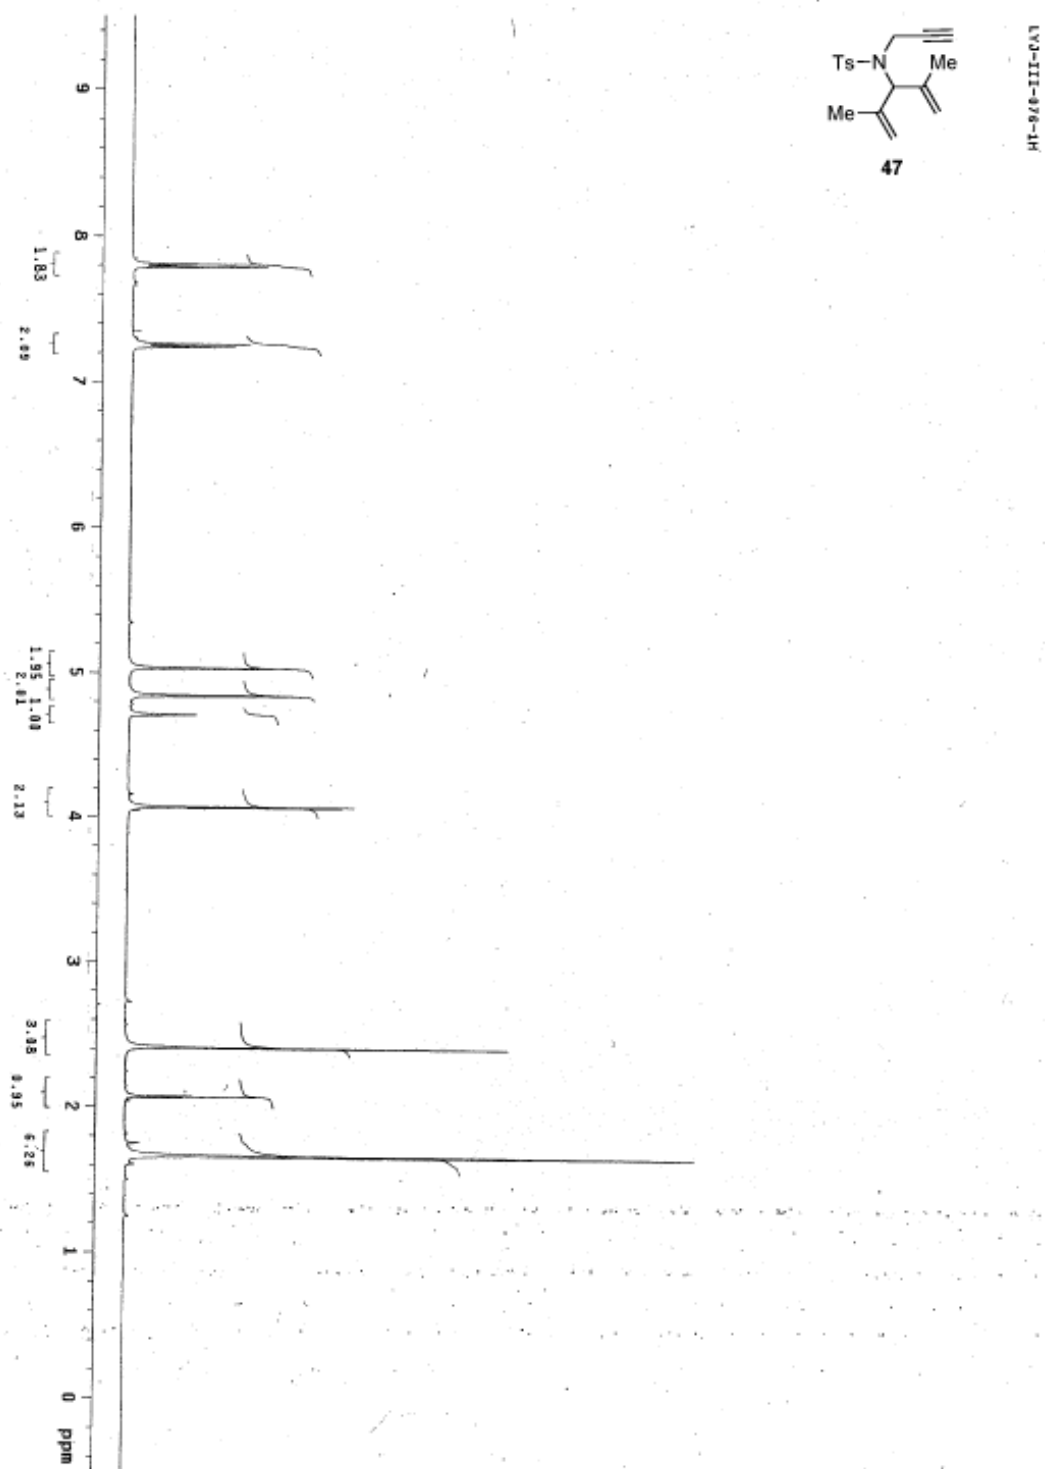

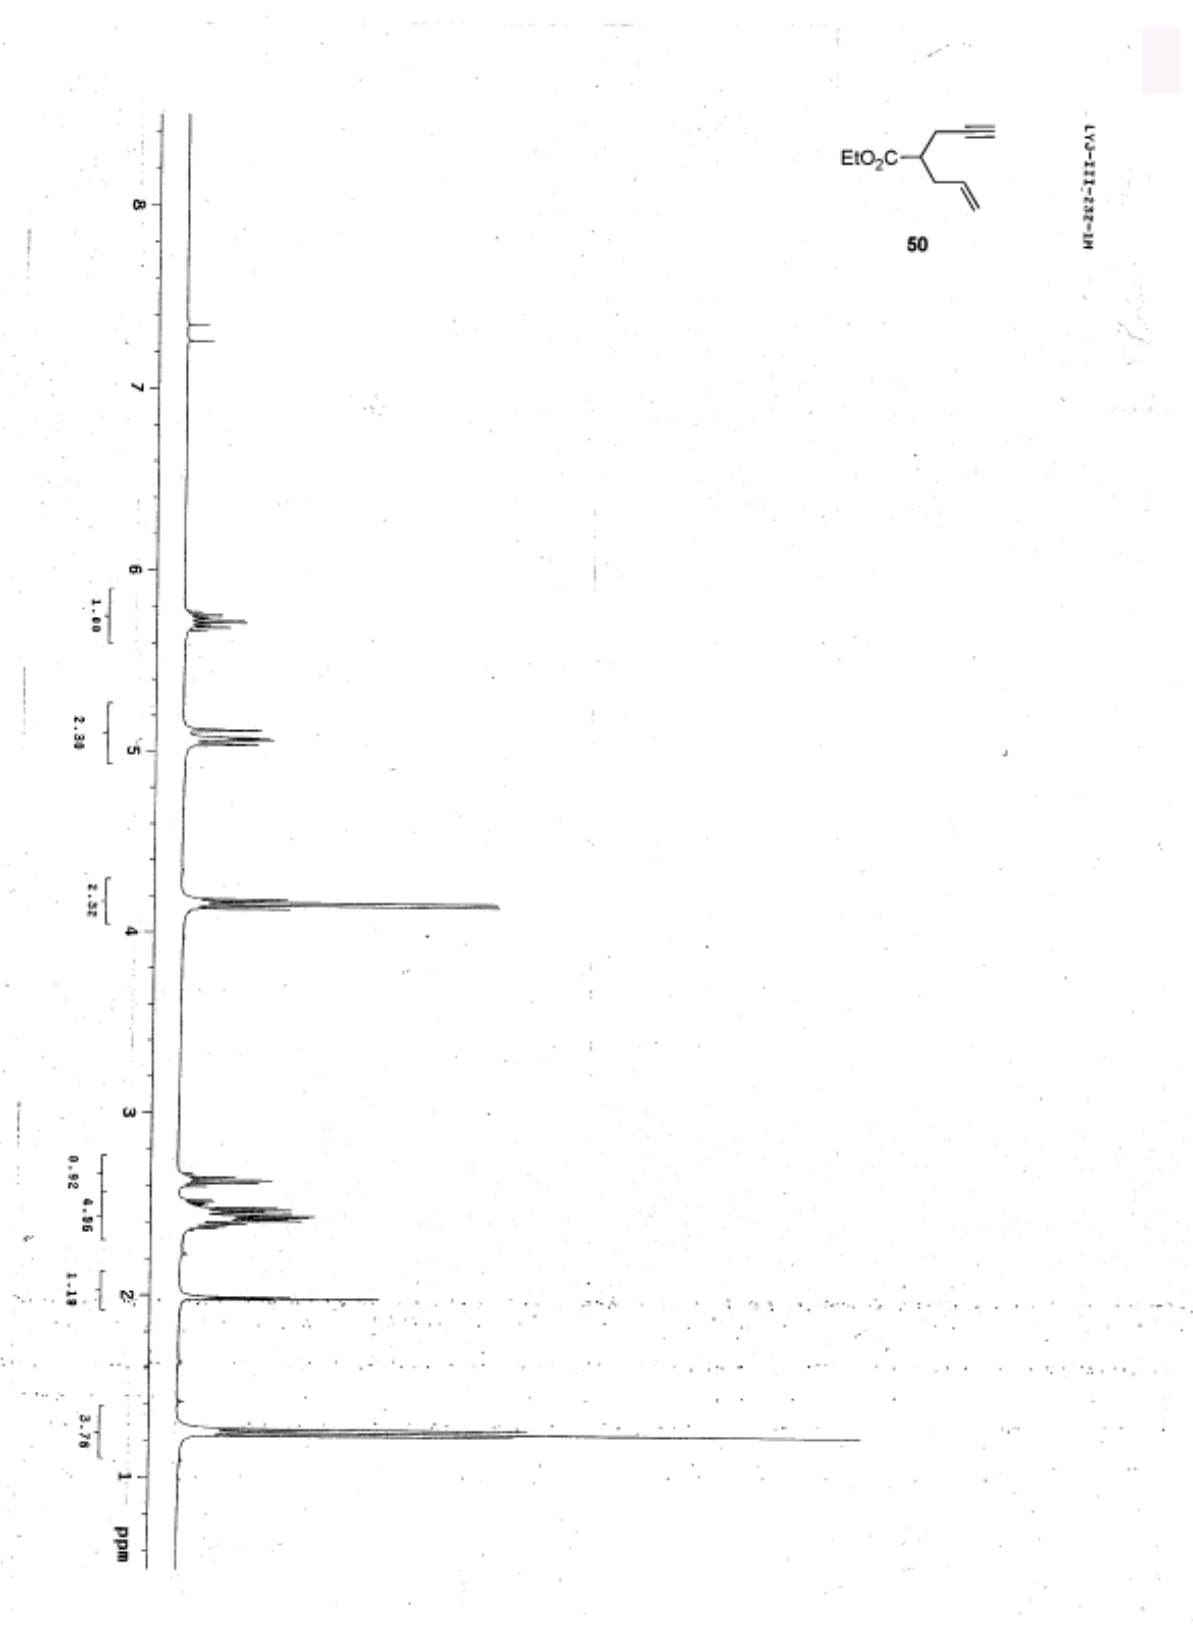

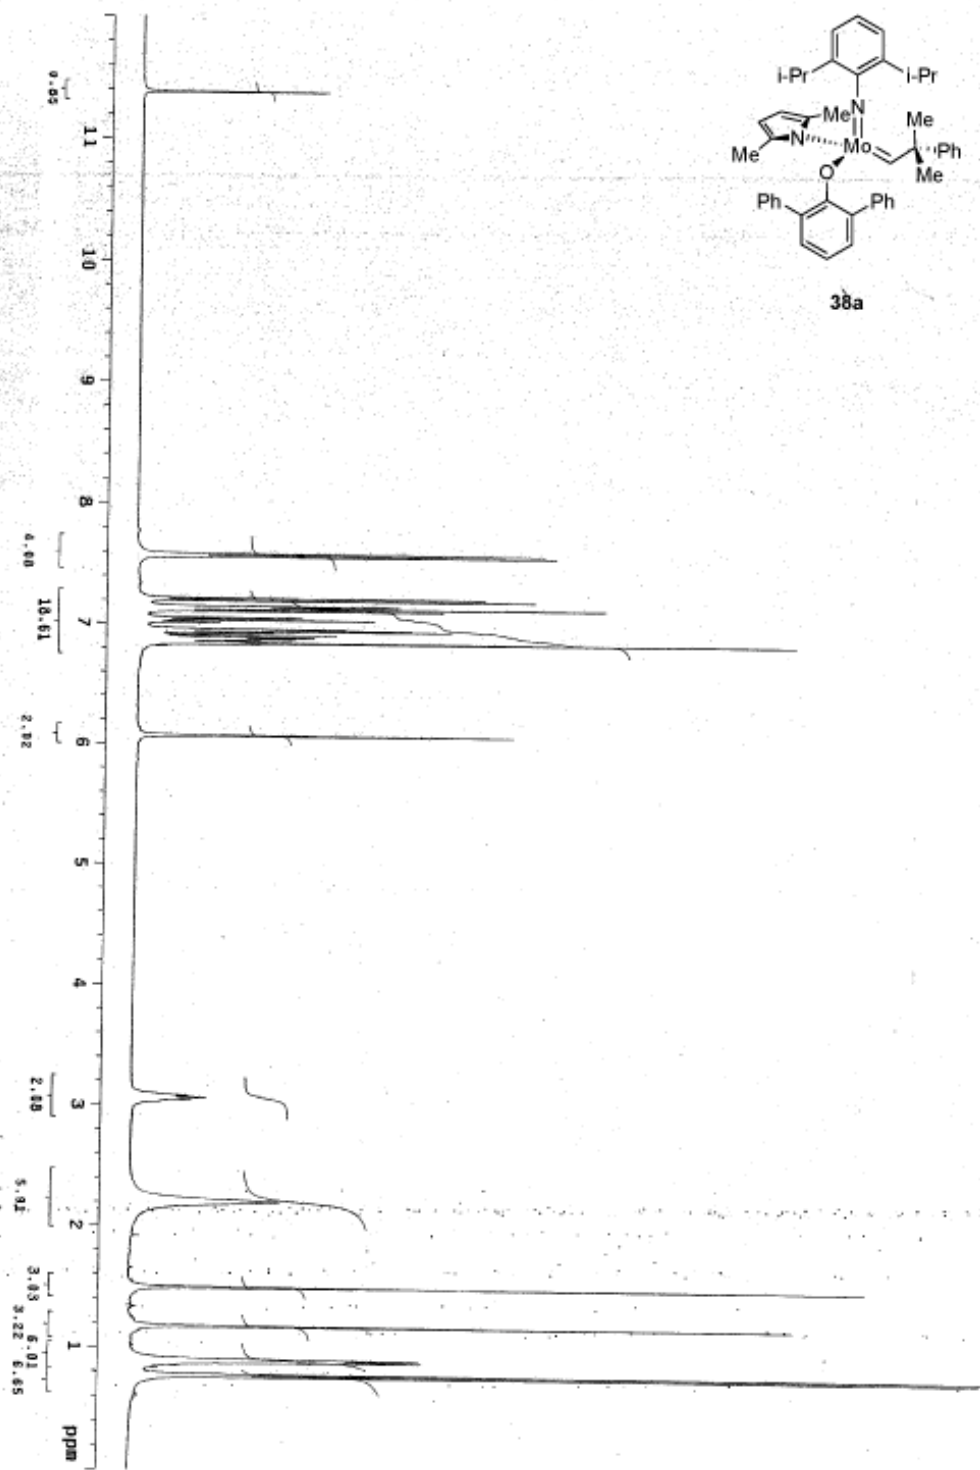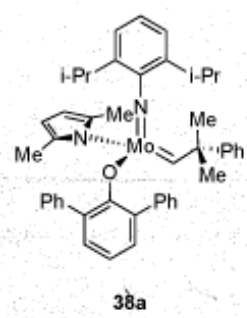

LV0-III-174-1A

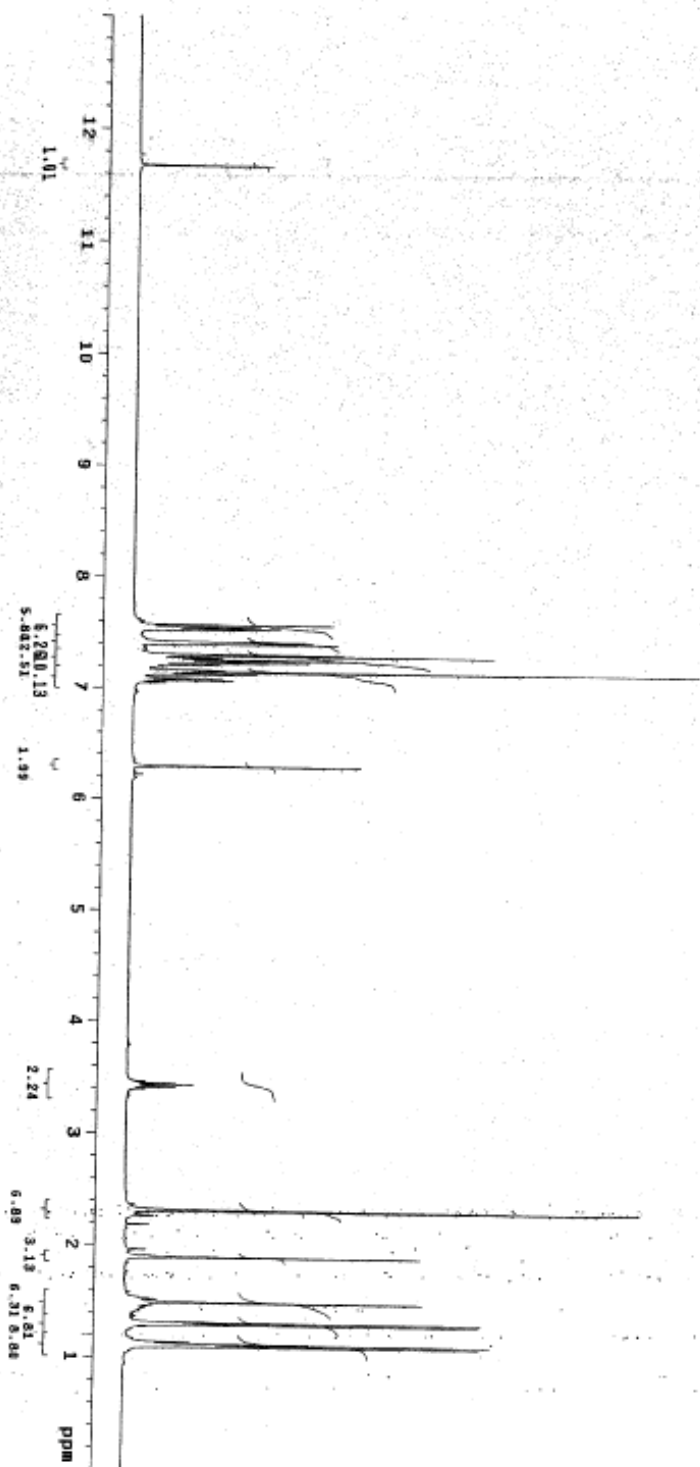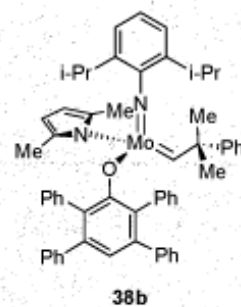

LV-III-647-11

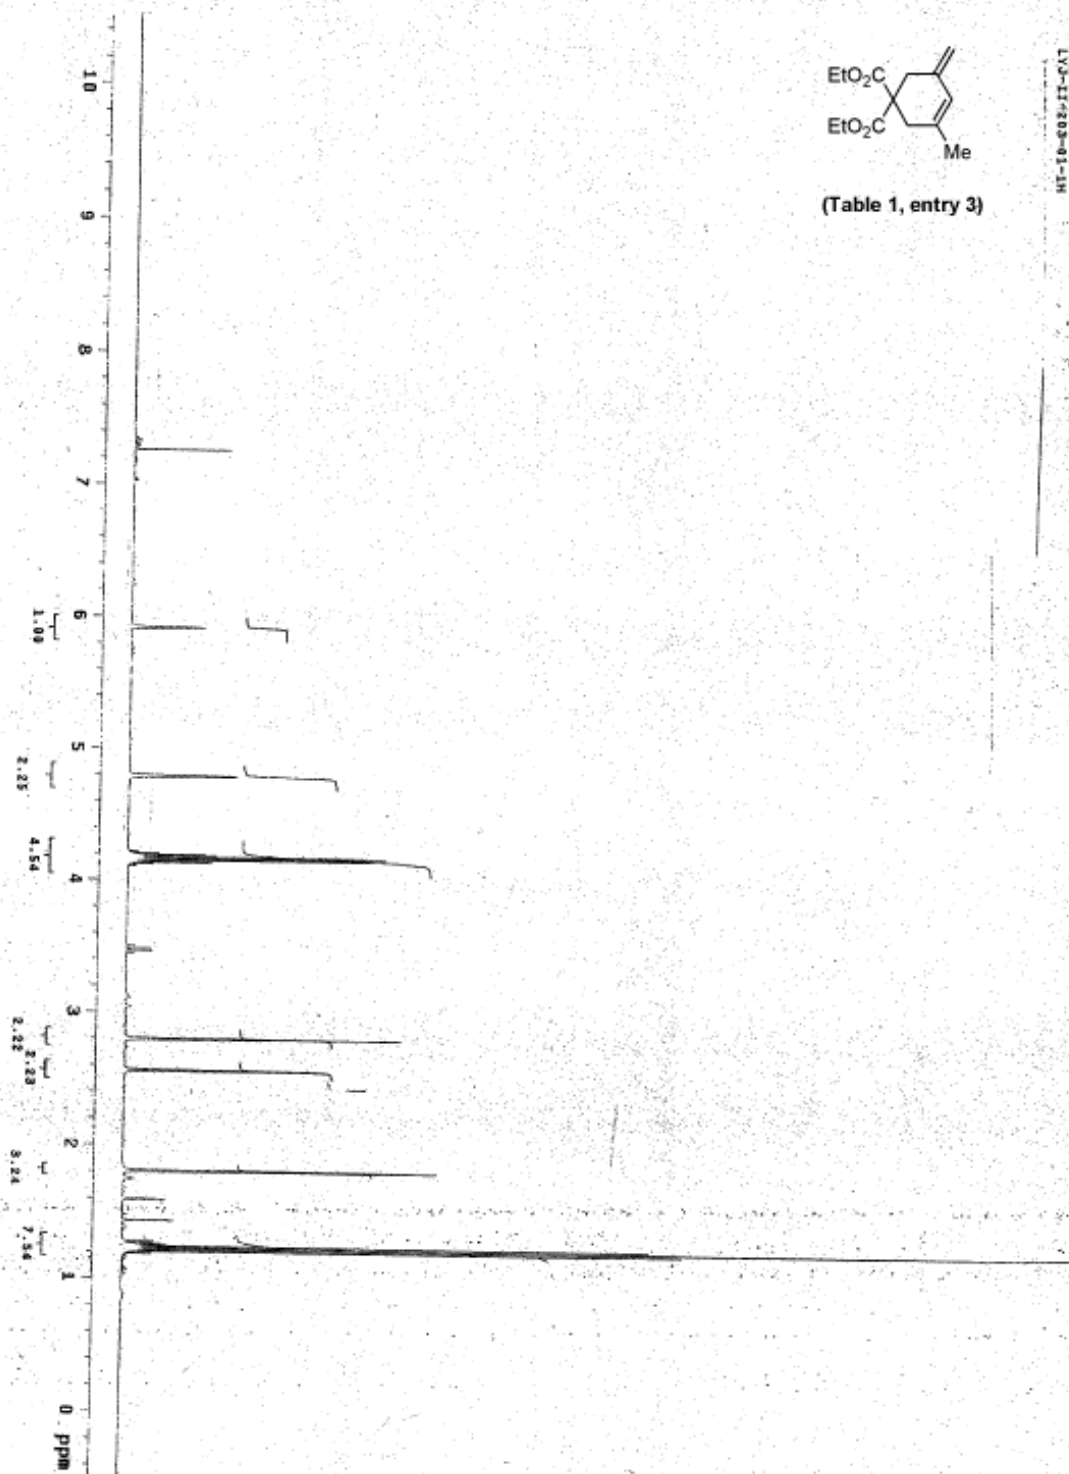



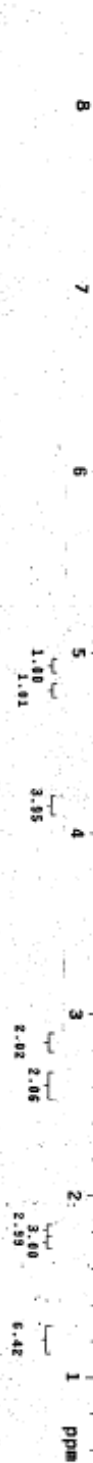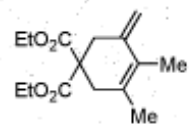

(Table 1, entry 4)

HT-001-III-CAT

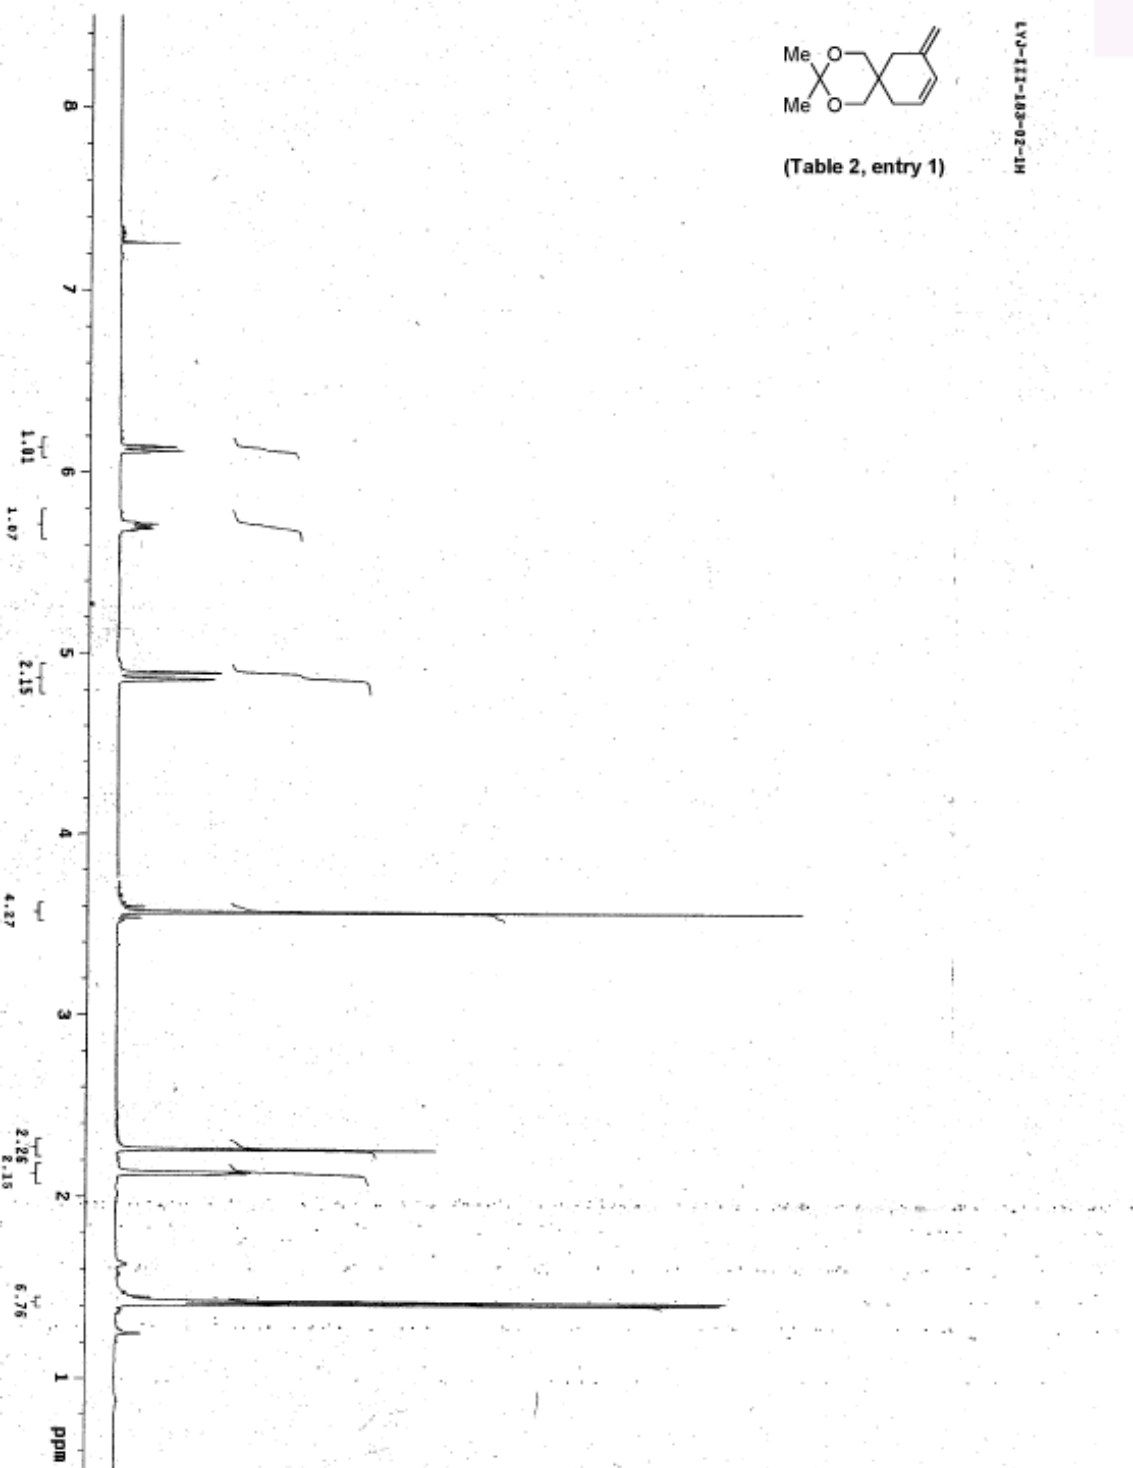

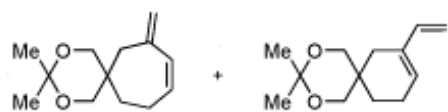

LVO-III-204-F

(Table 2, entry 2)  
ratio of *endo* and *exo* product = 66 : 33

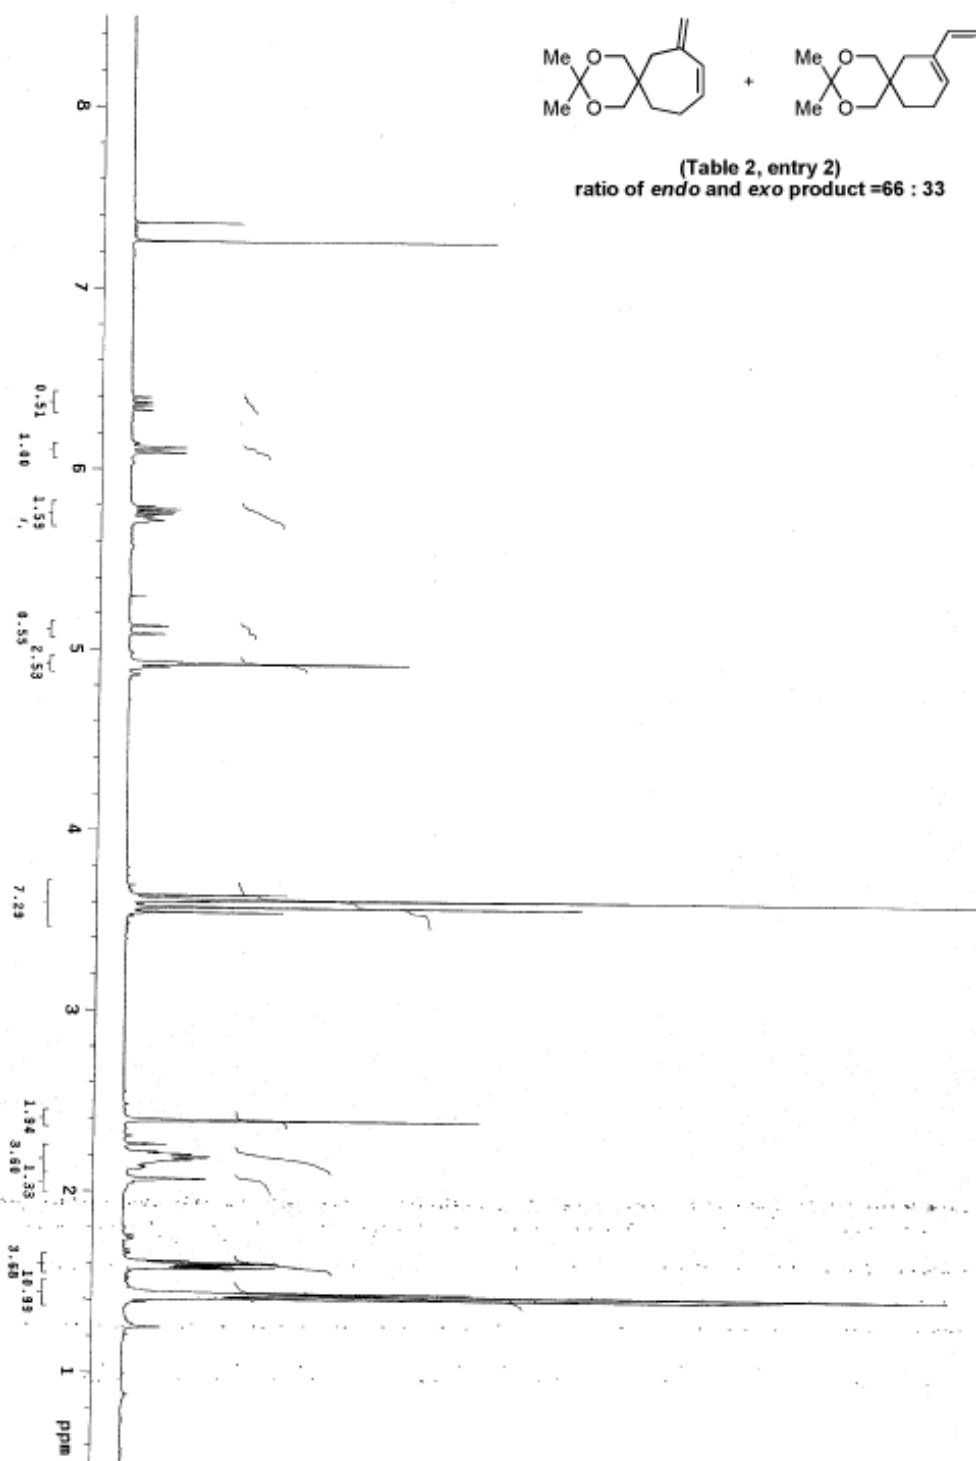

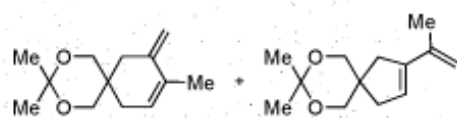

(Table 2, entry 3)  
ratio of *endo* and *exo* product = 75 : 25

LVJ-III-186-04-2H-1

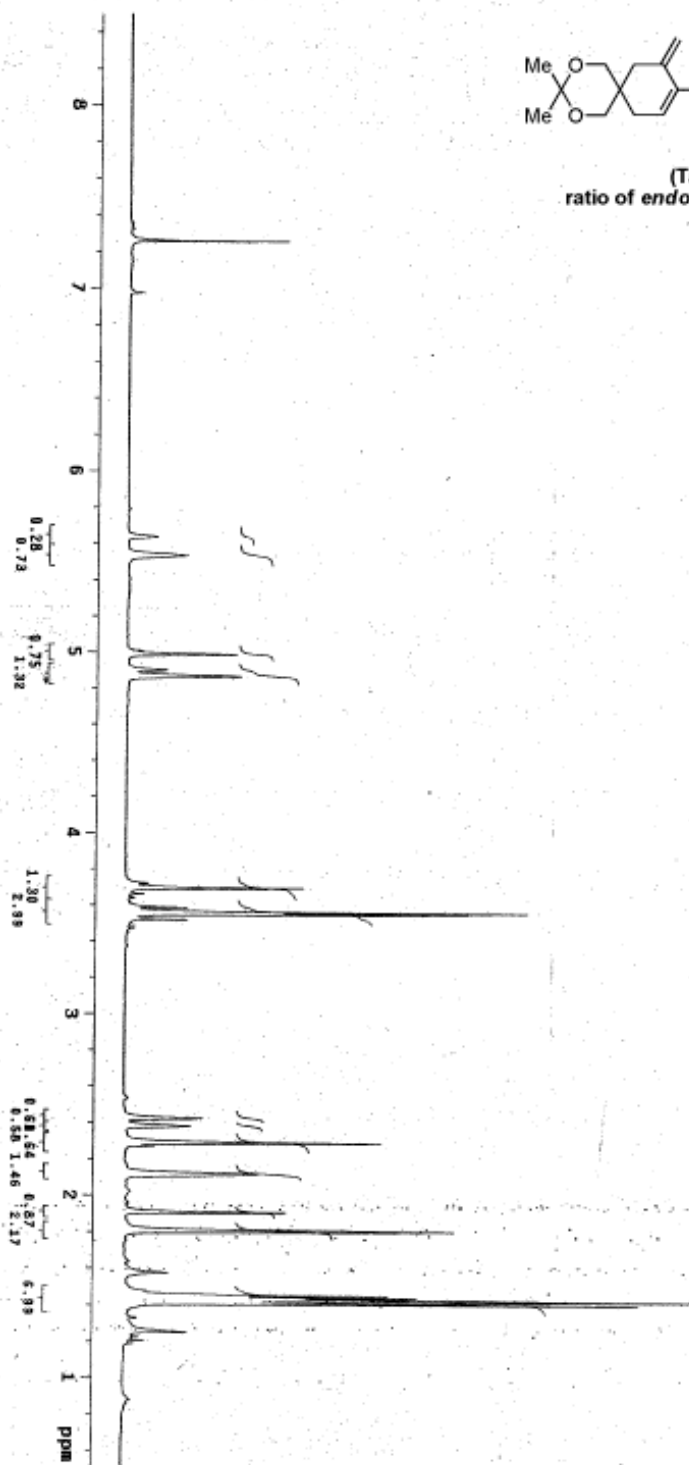

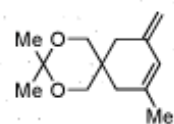

LVJ-III-205

(Table 2, entry 4)

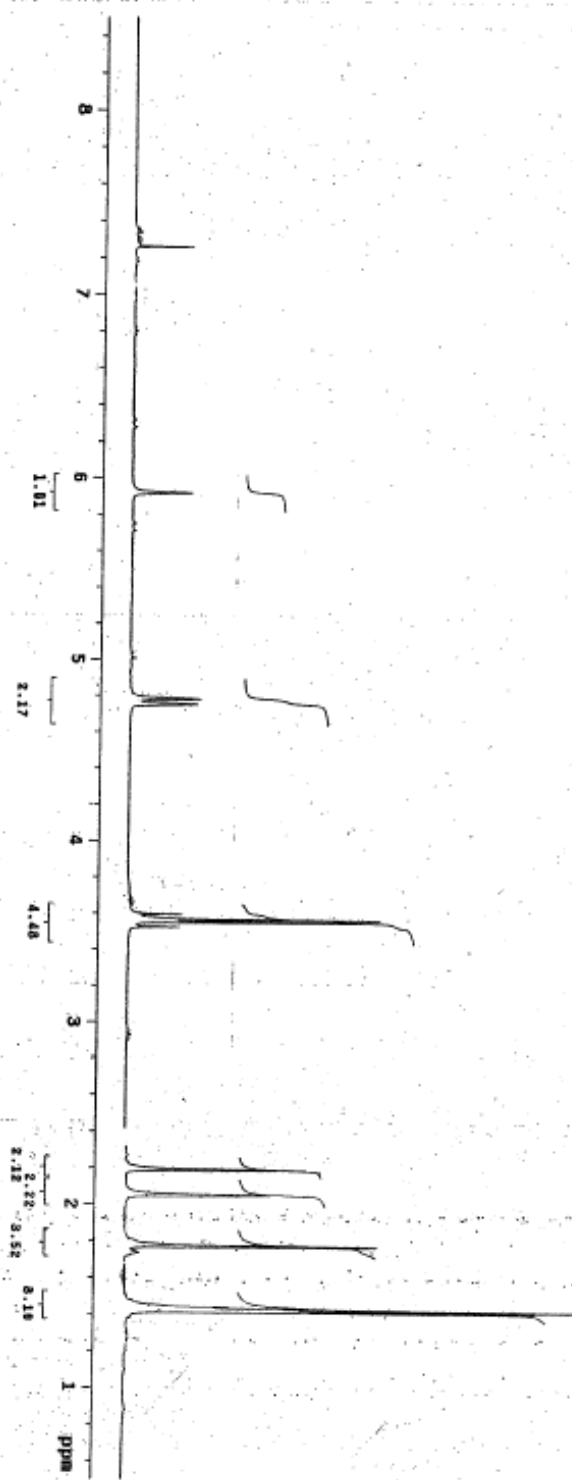

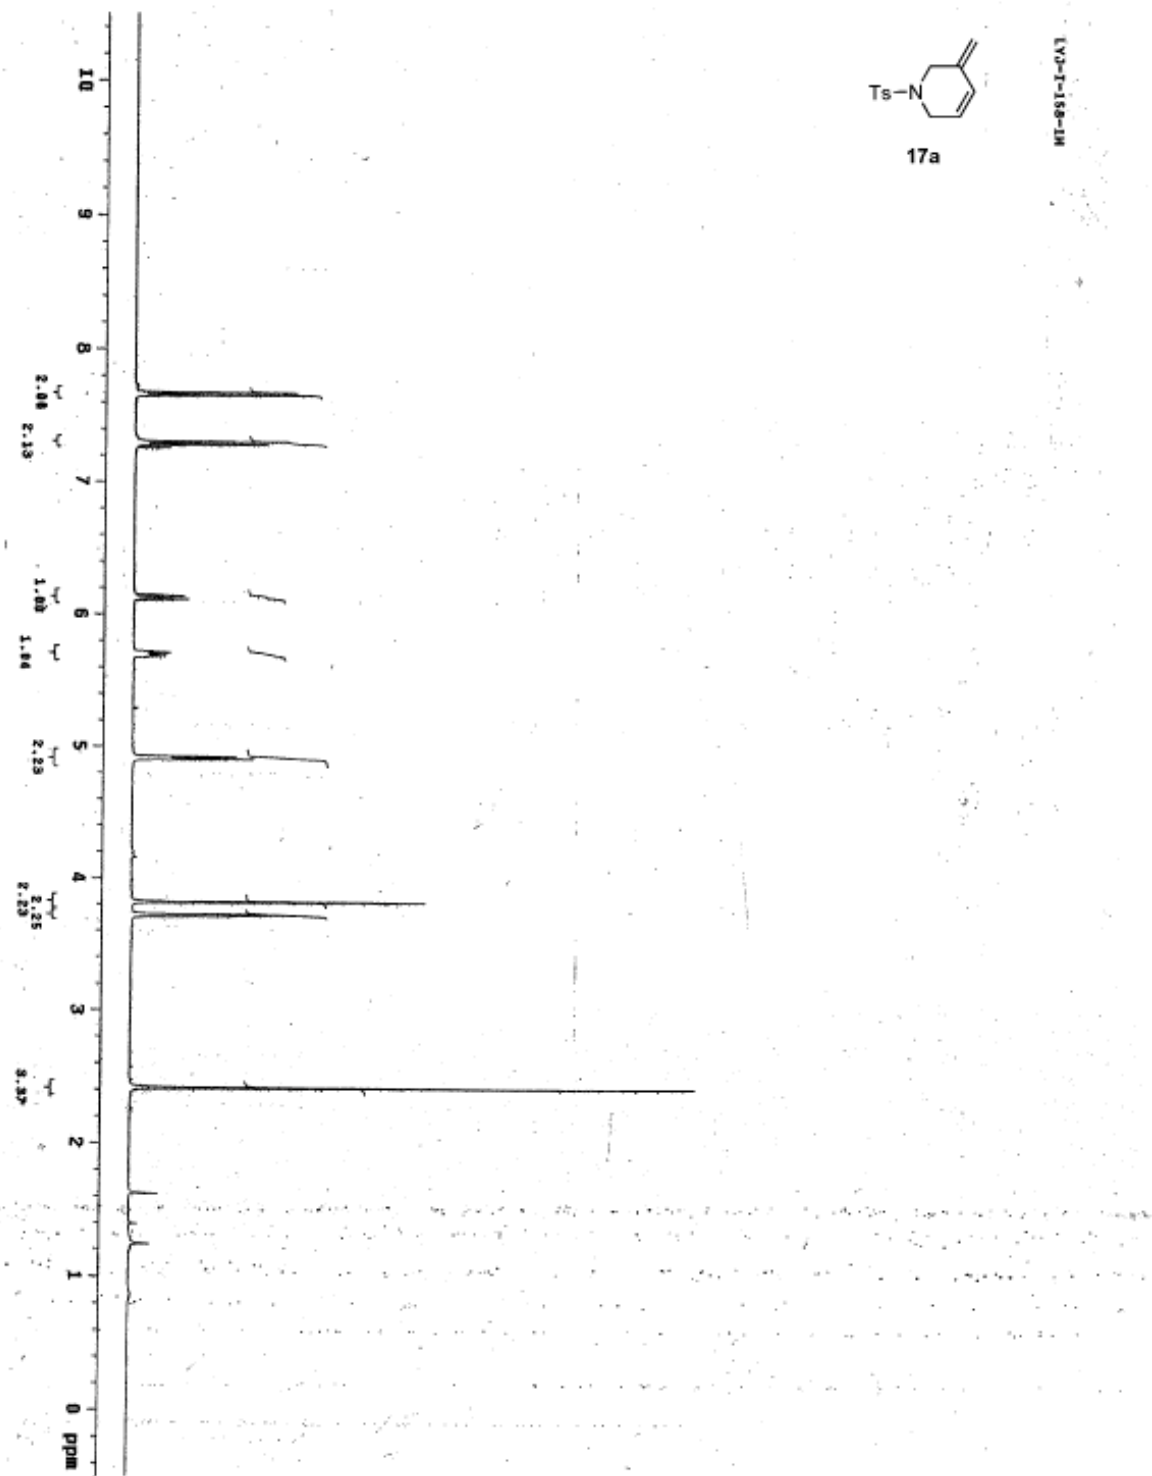

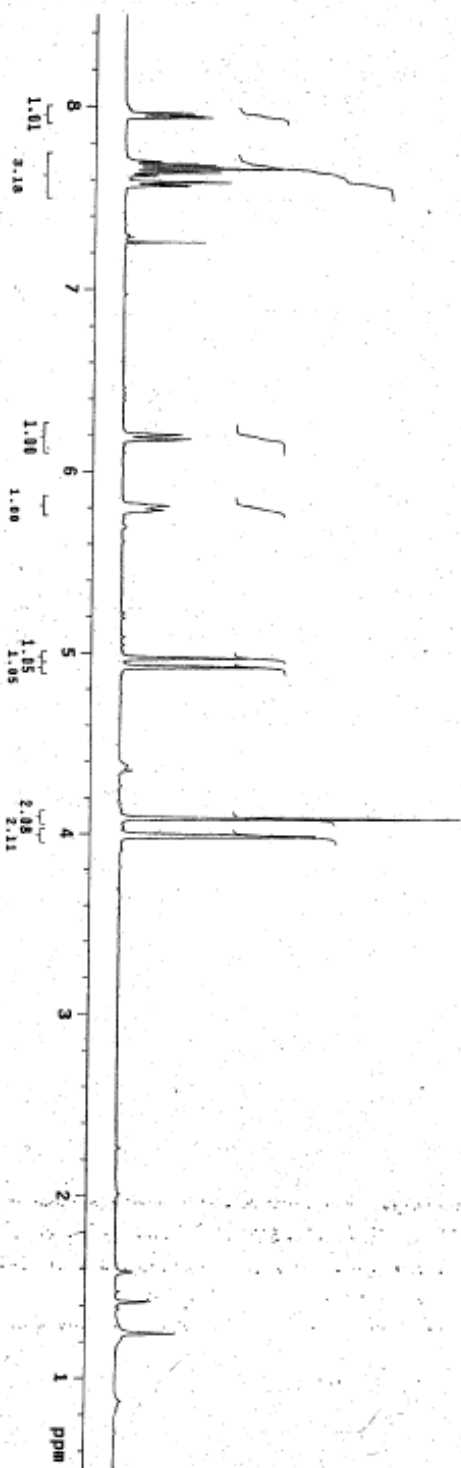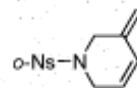

17b

MS-90T-111-CAT

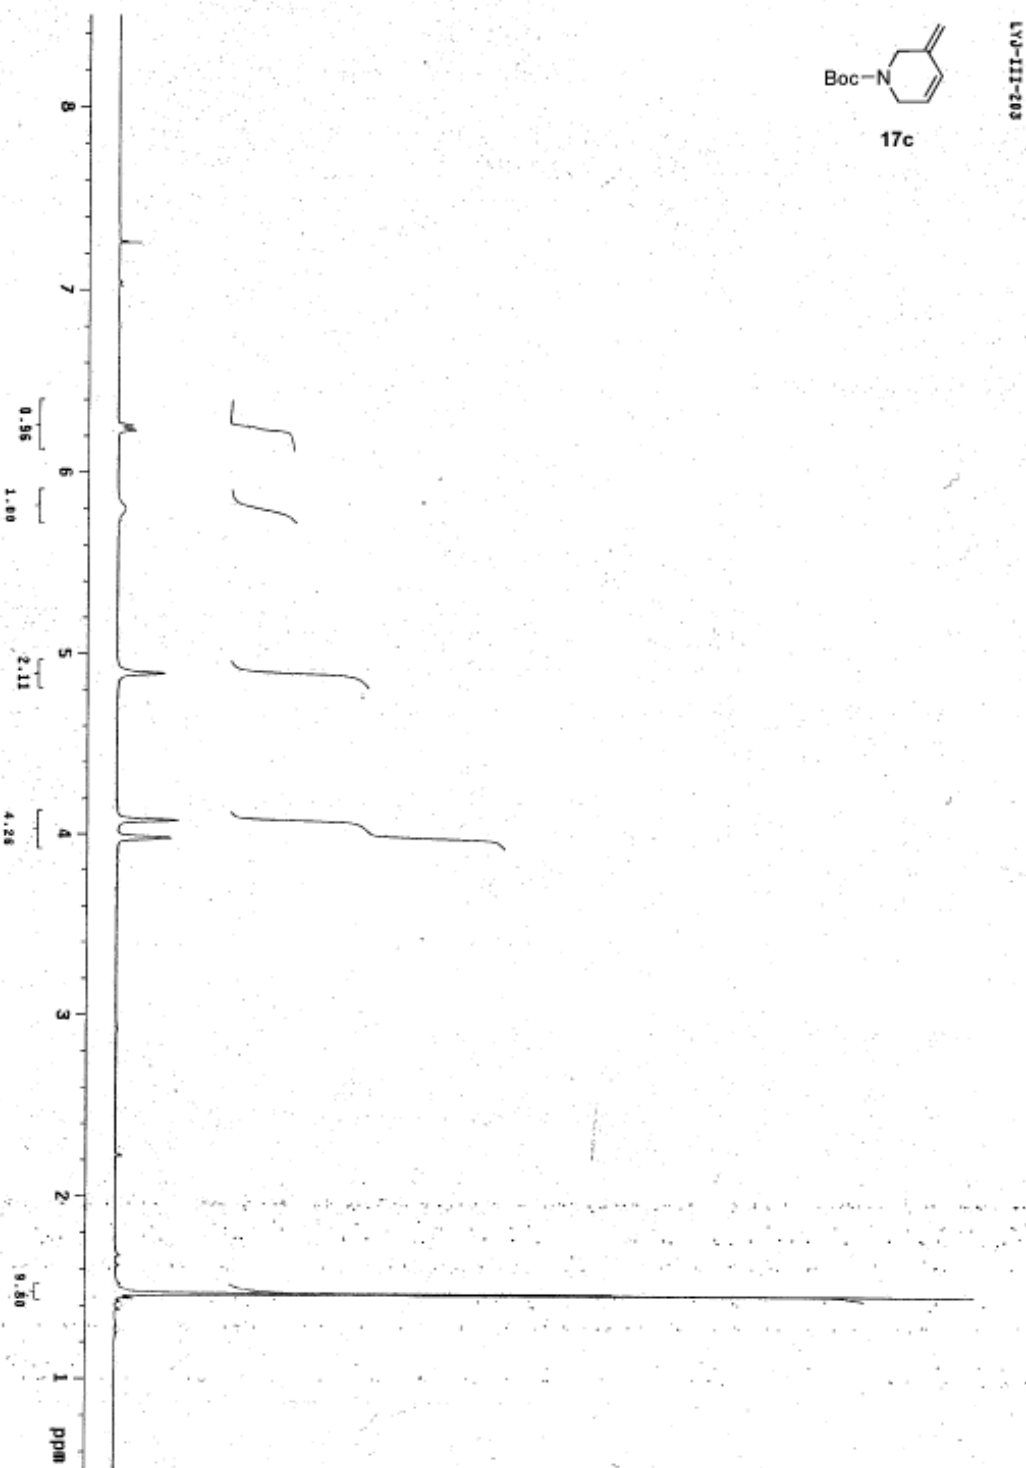





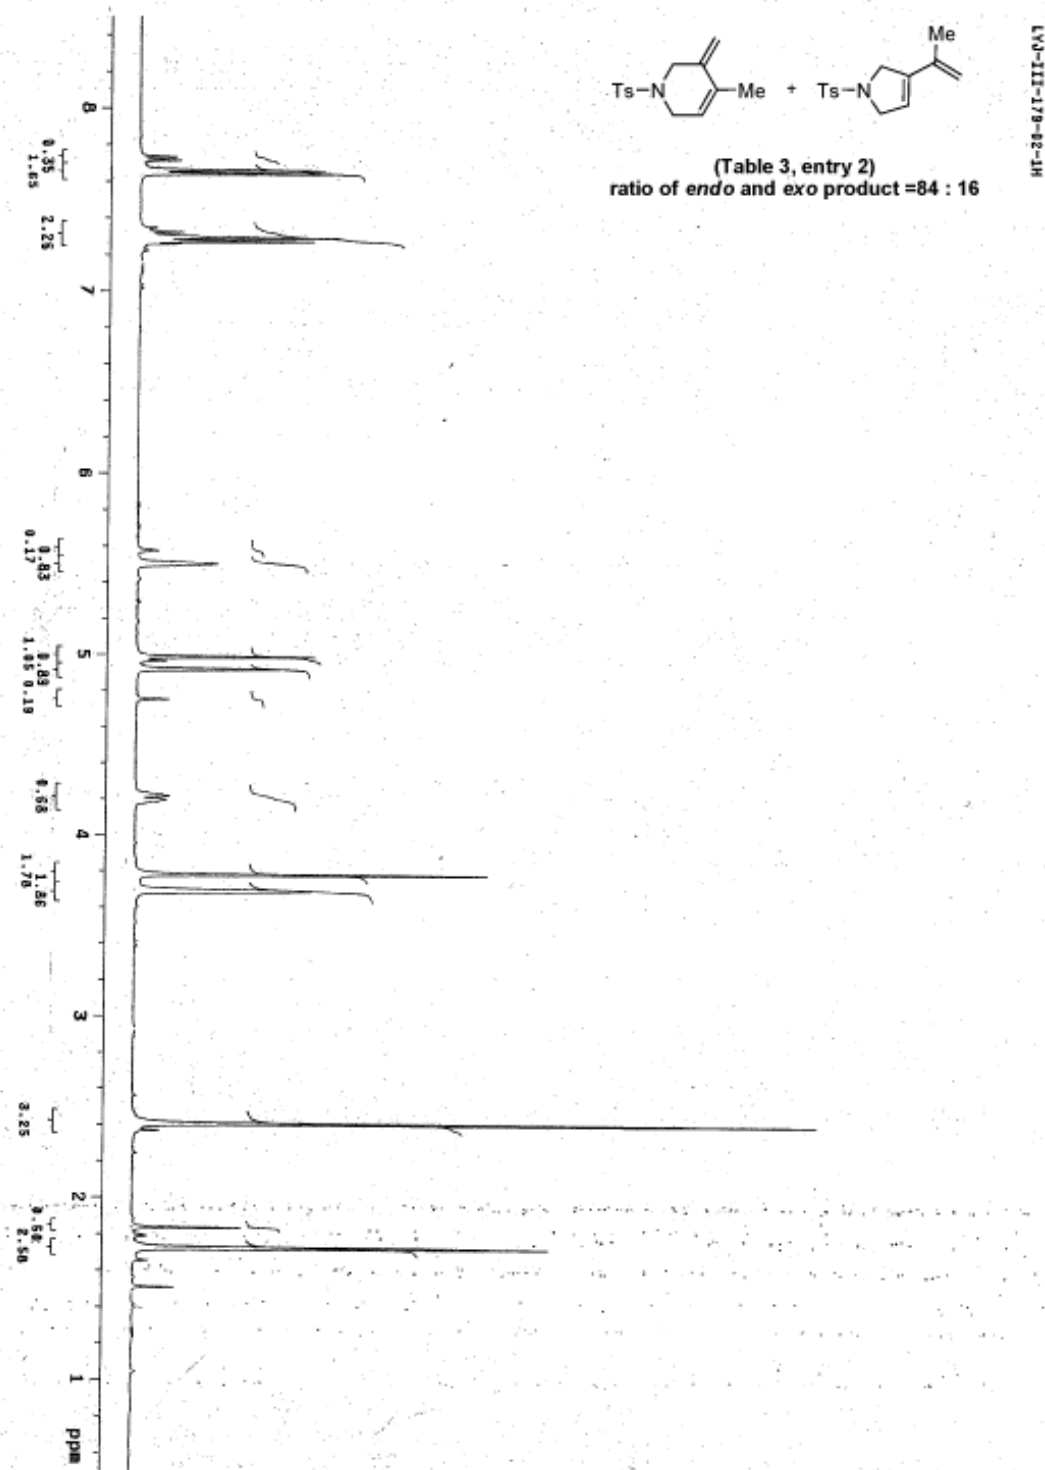

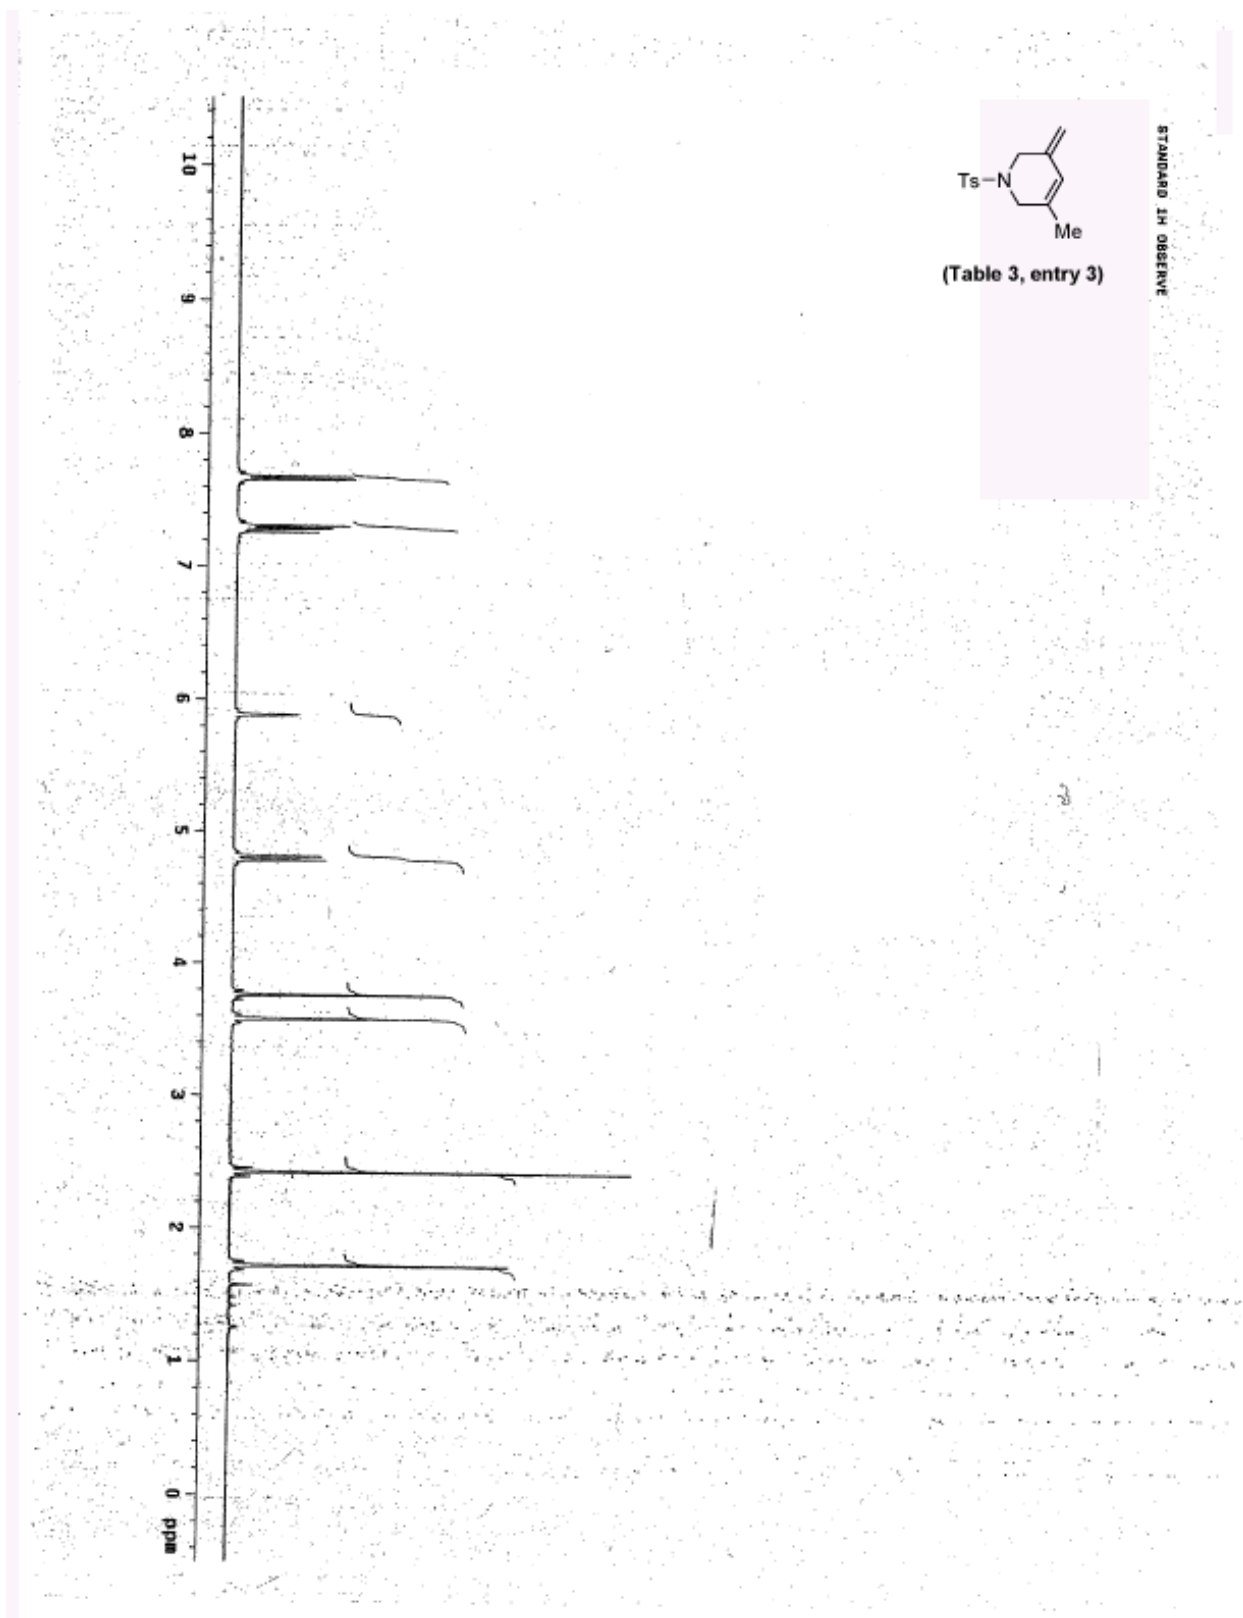

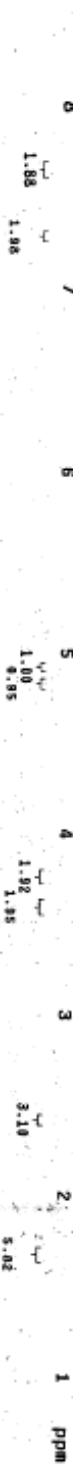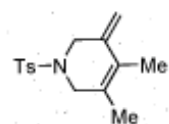

(Table 3, entry 4)

1VO-III-021

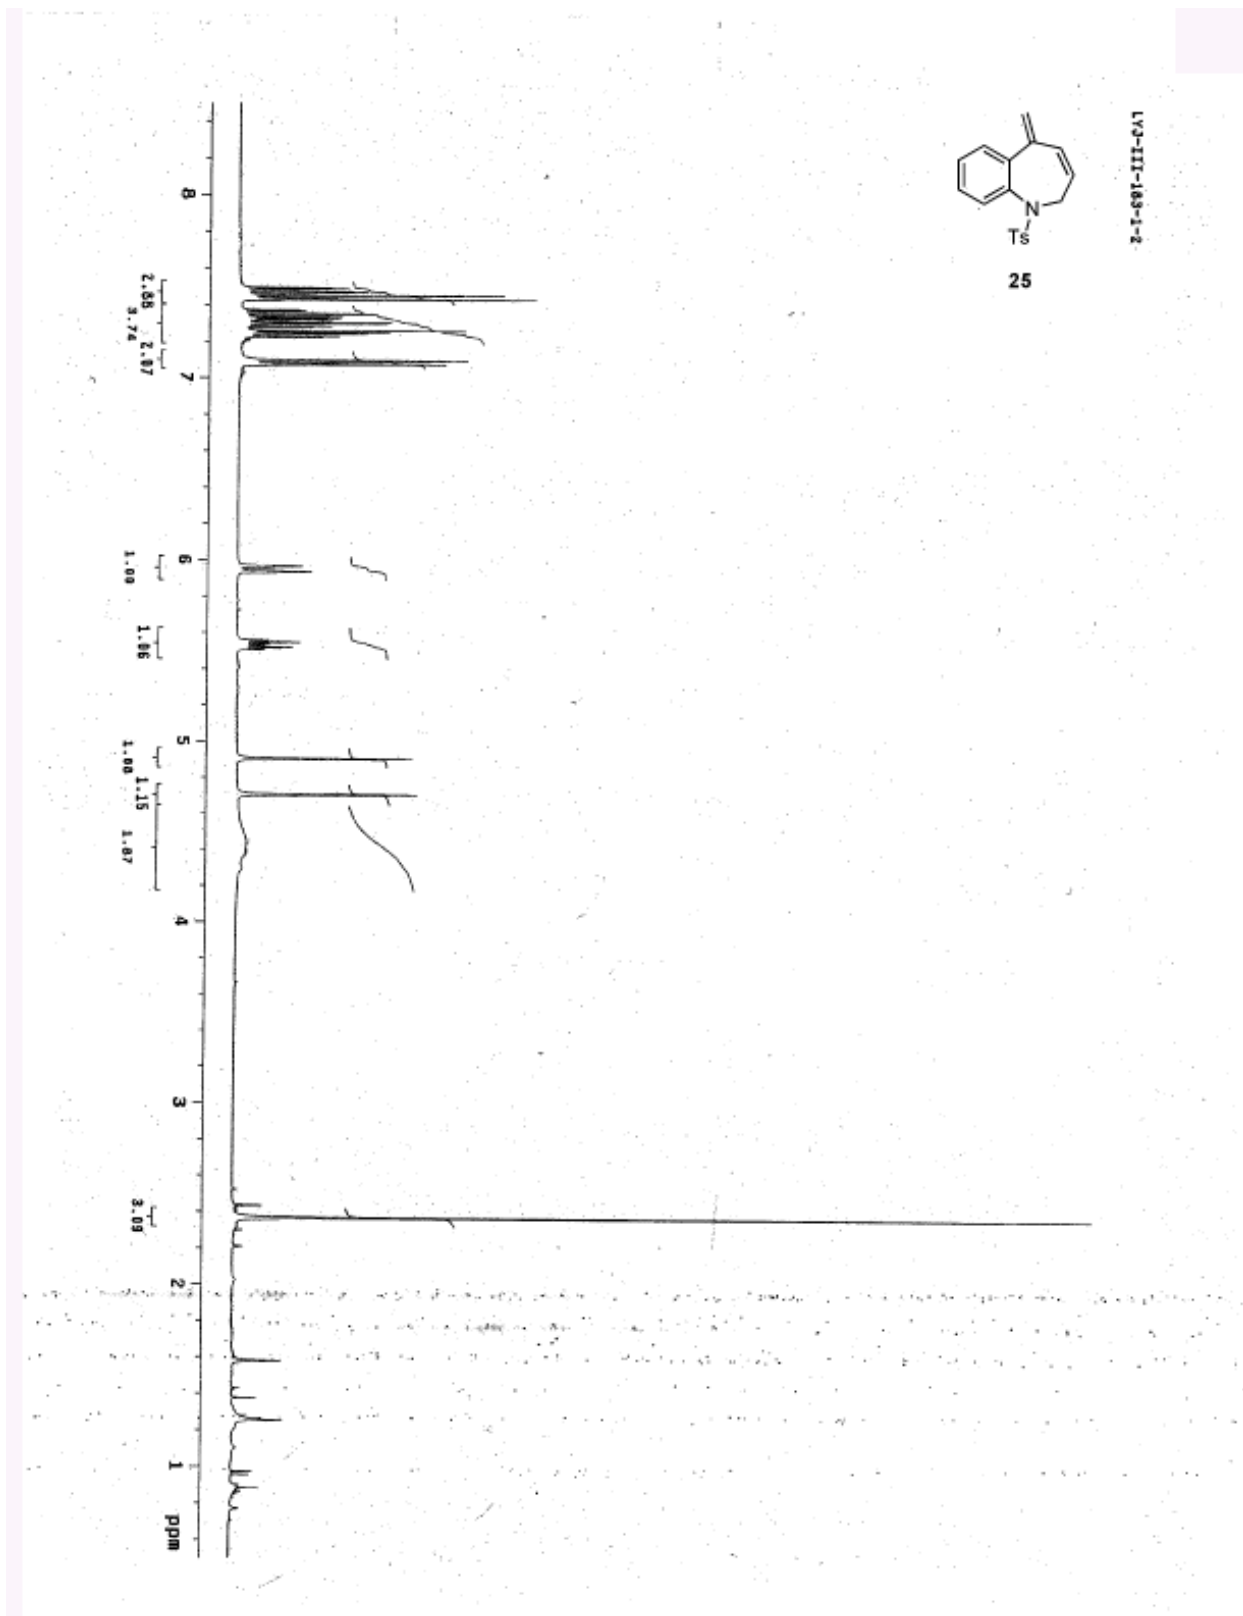

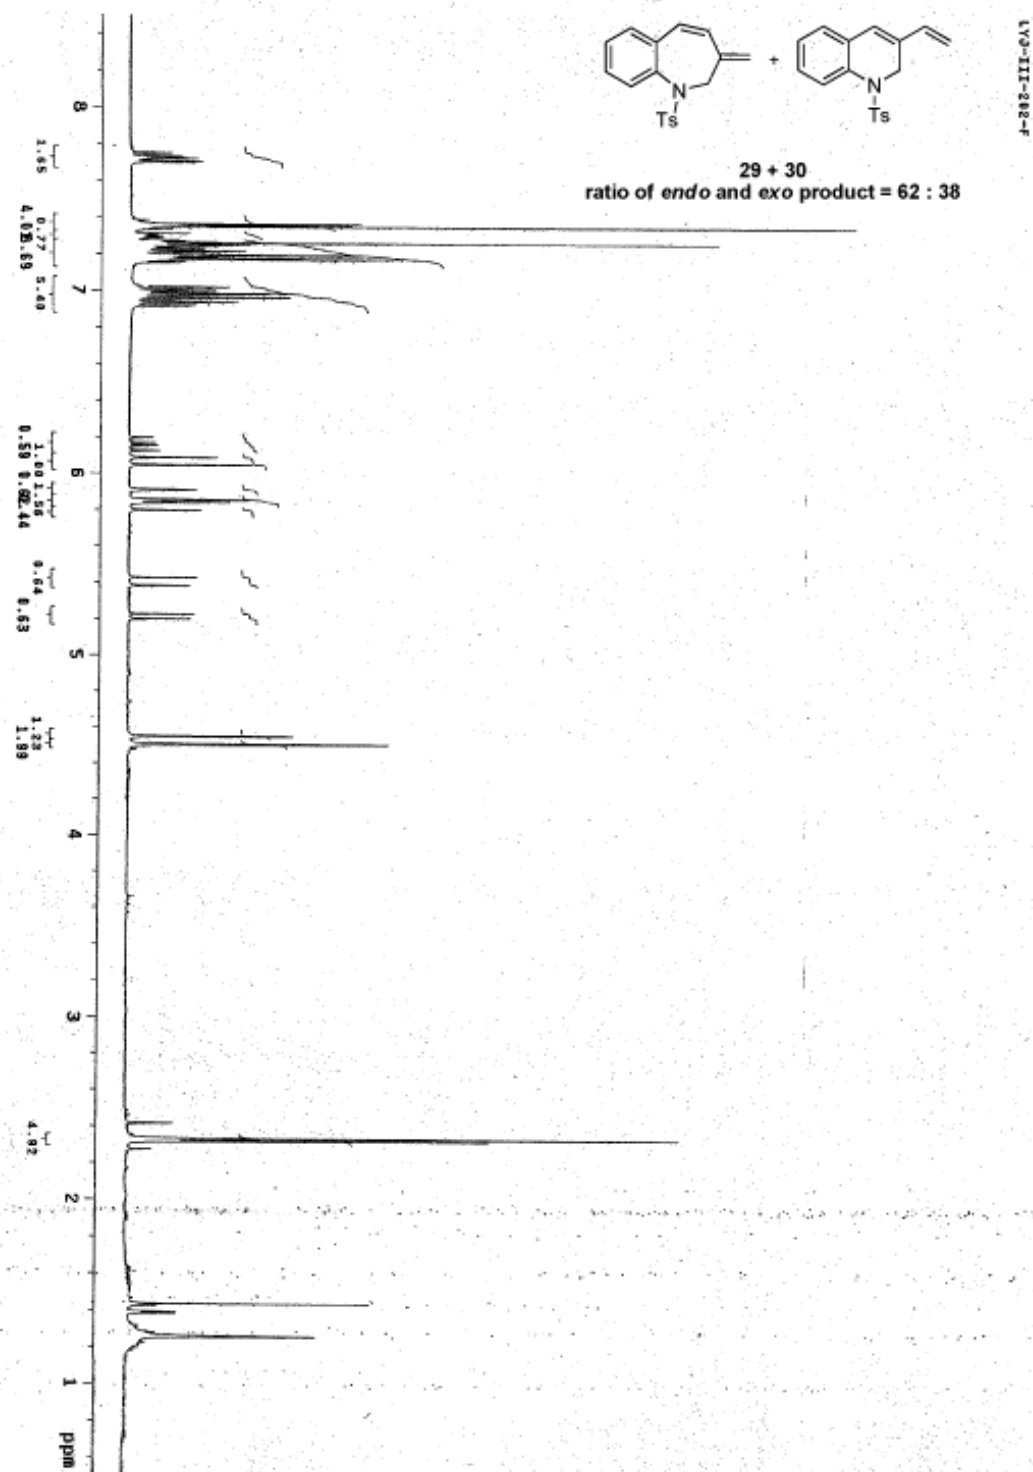

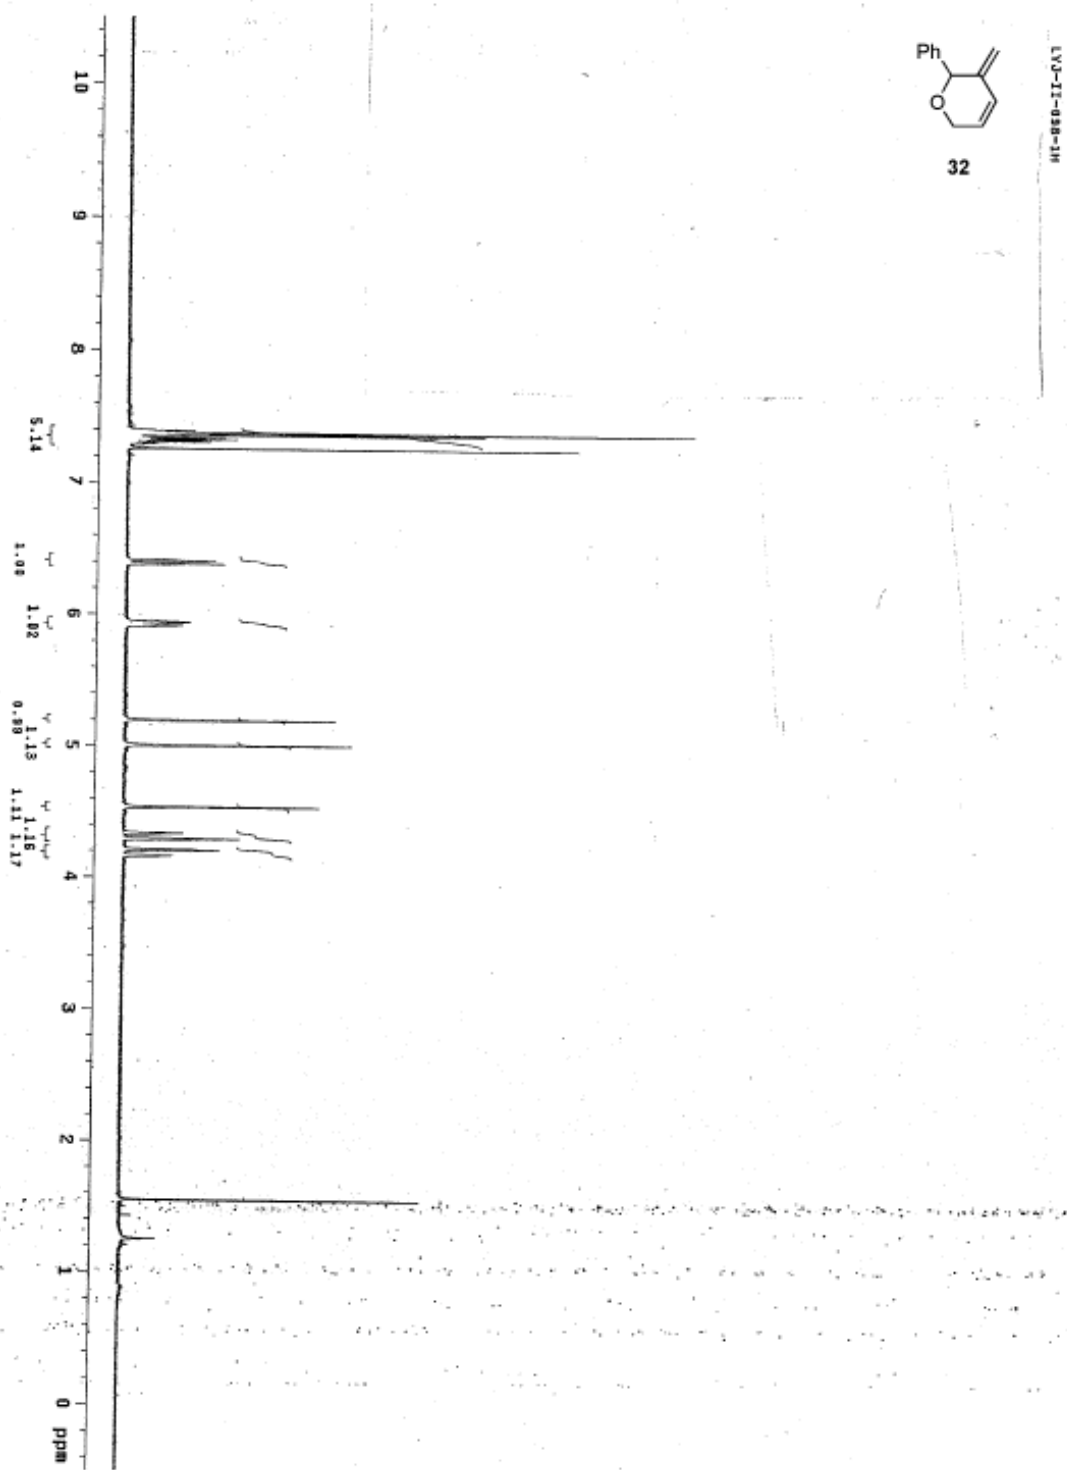

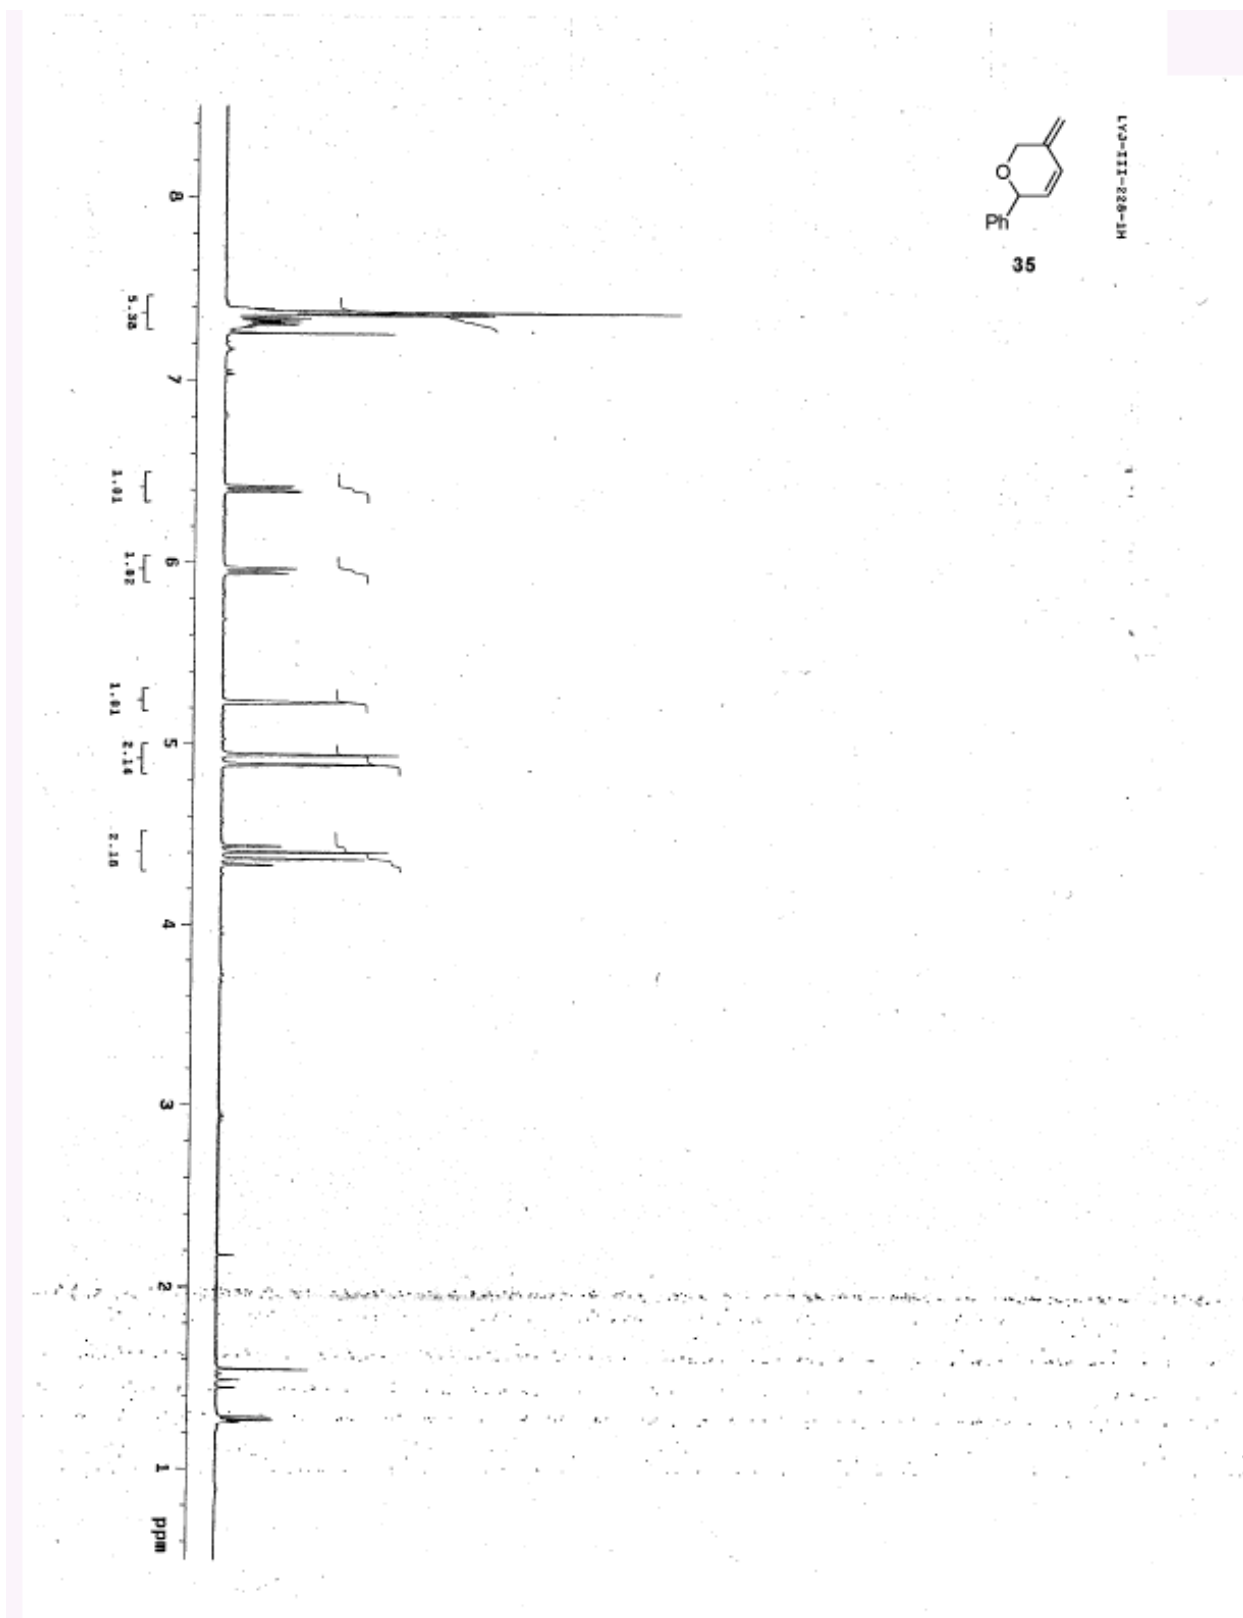



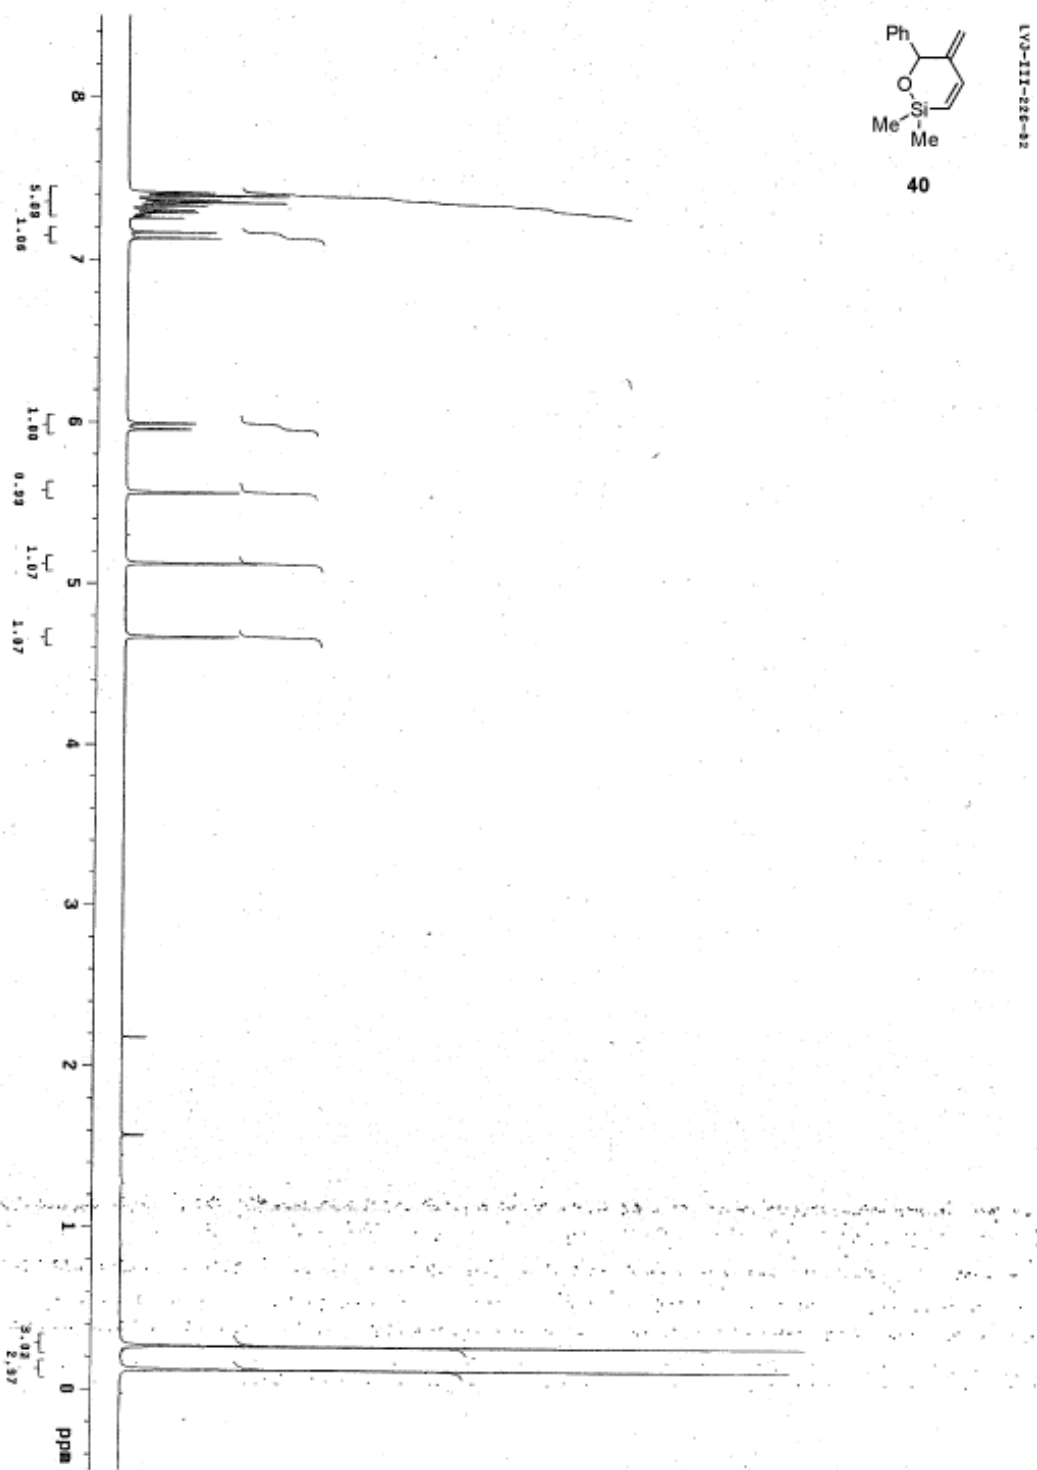

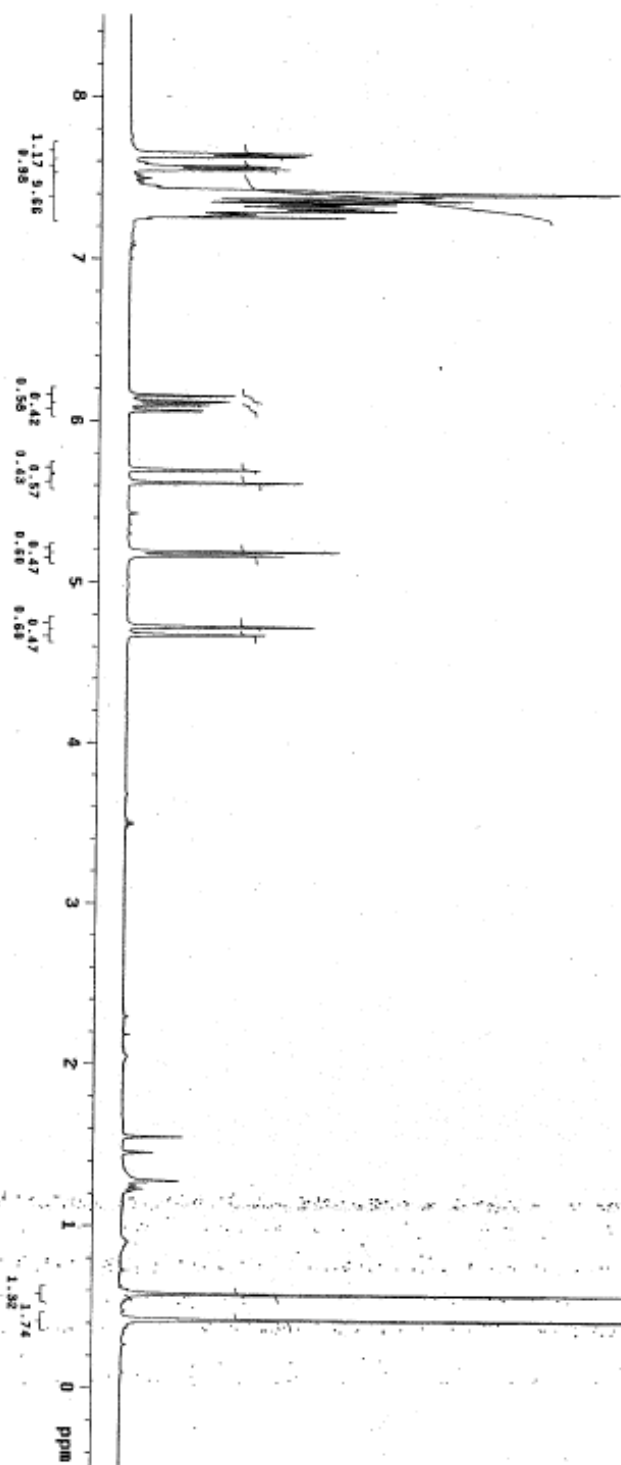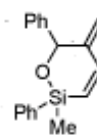

42

SI-9(I)-III-C17

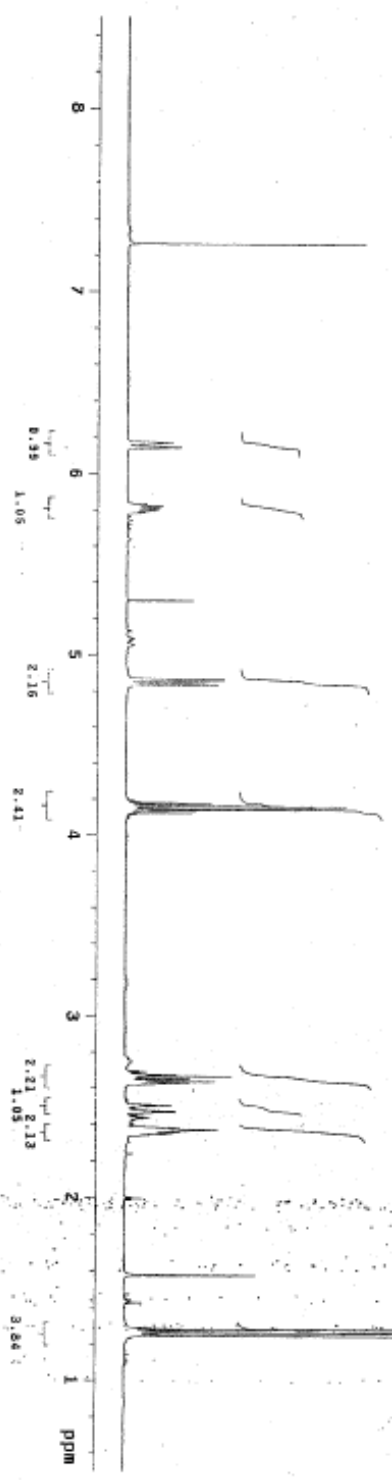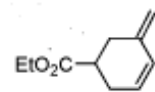

51

HT-53-411-043

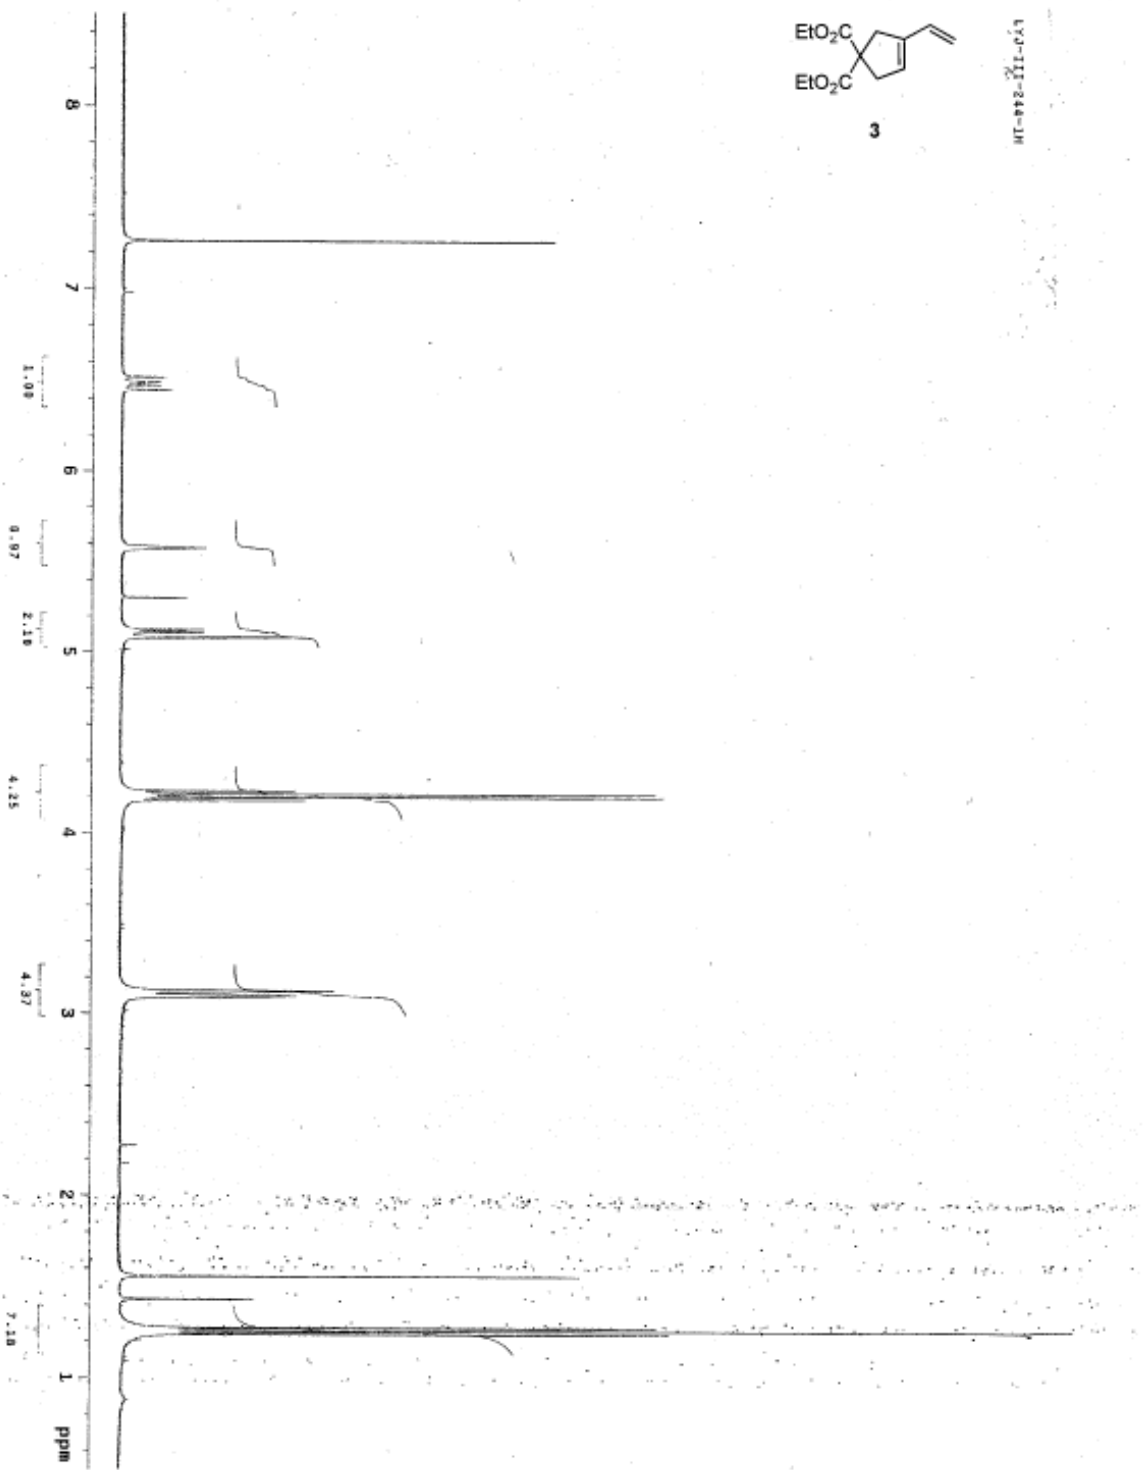

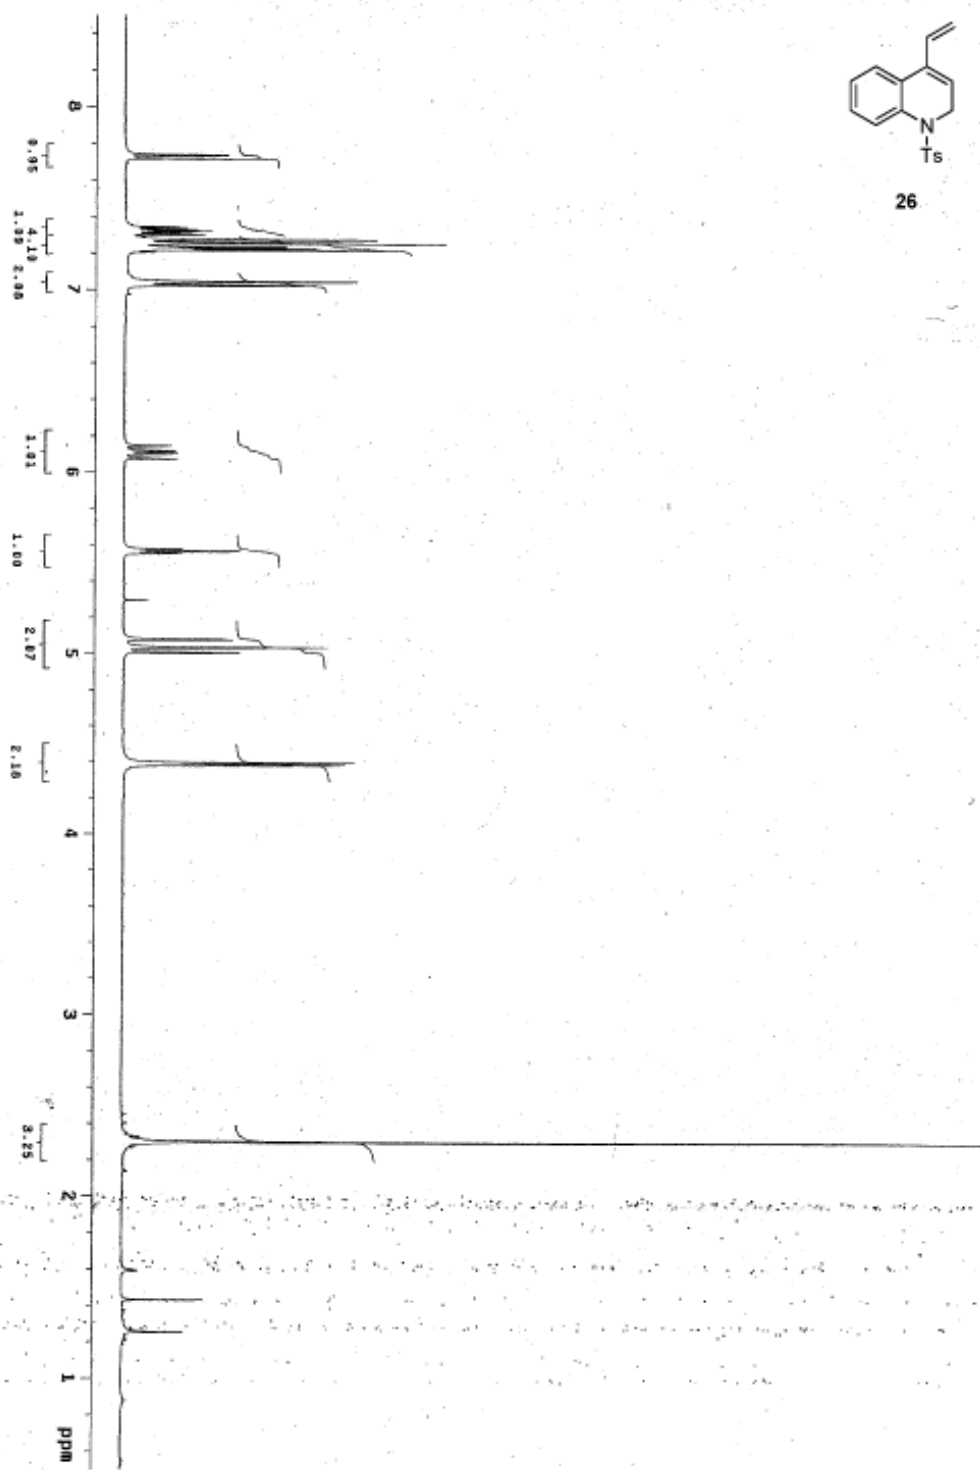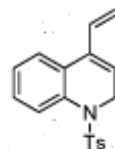

26

WT-582-T13-04A1

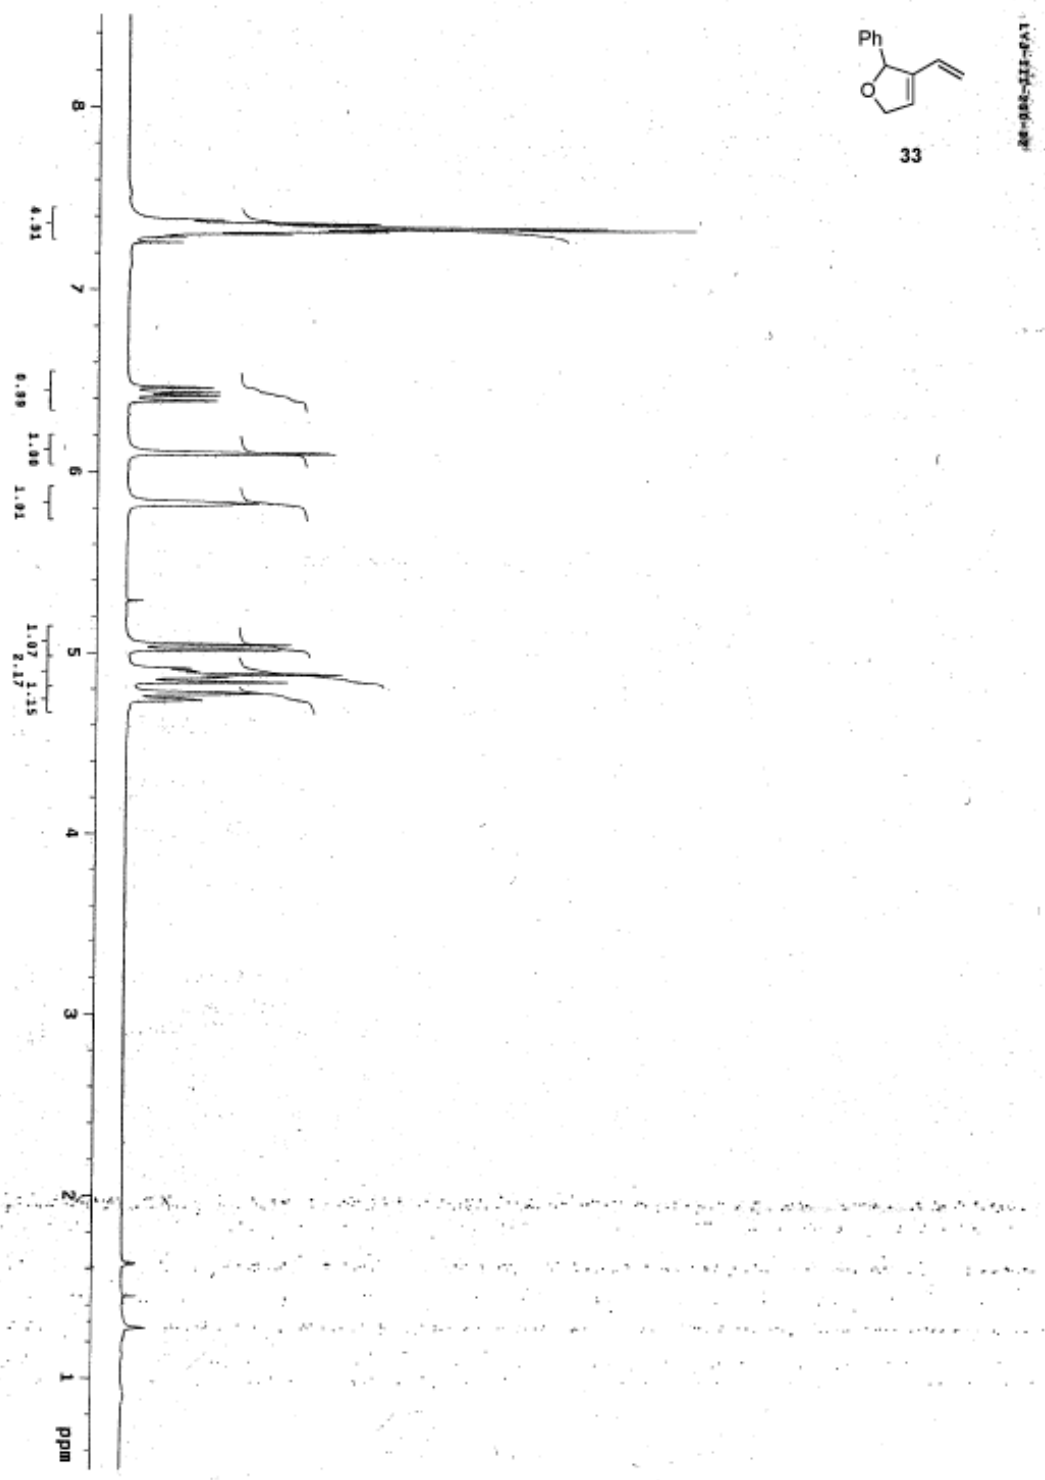

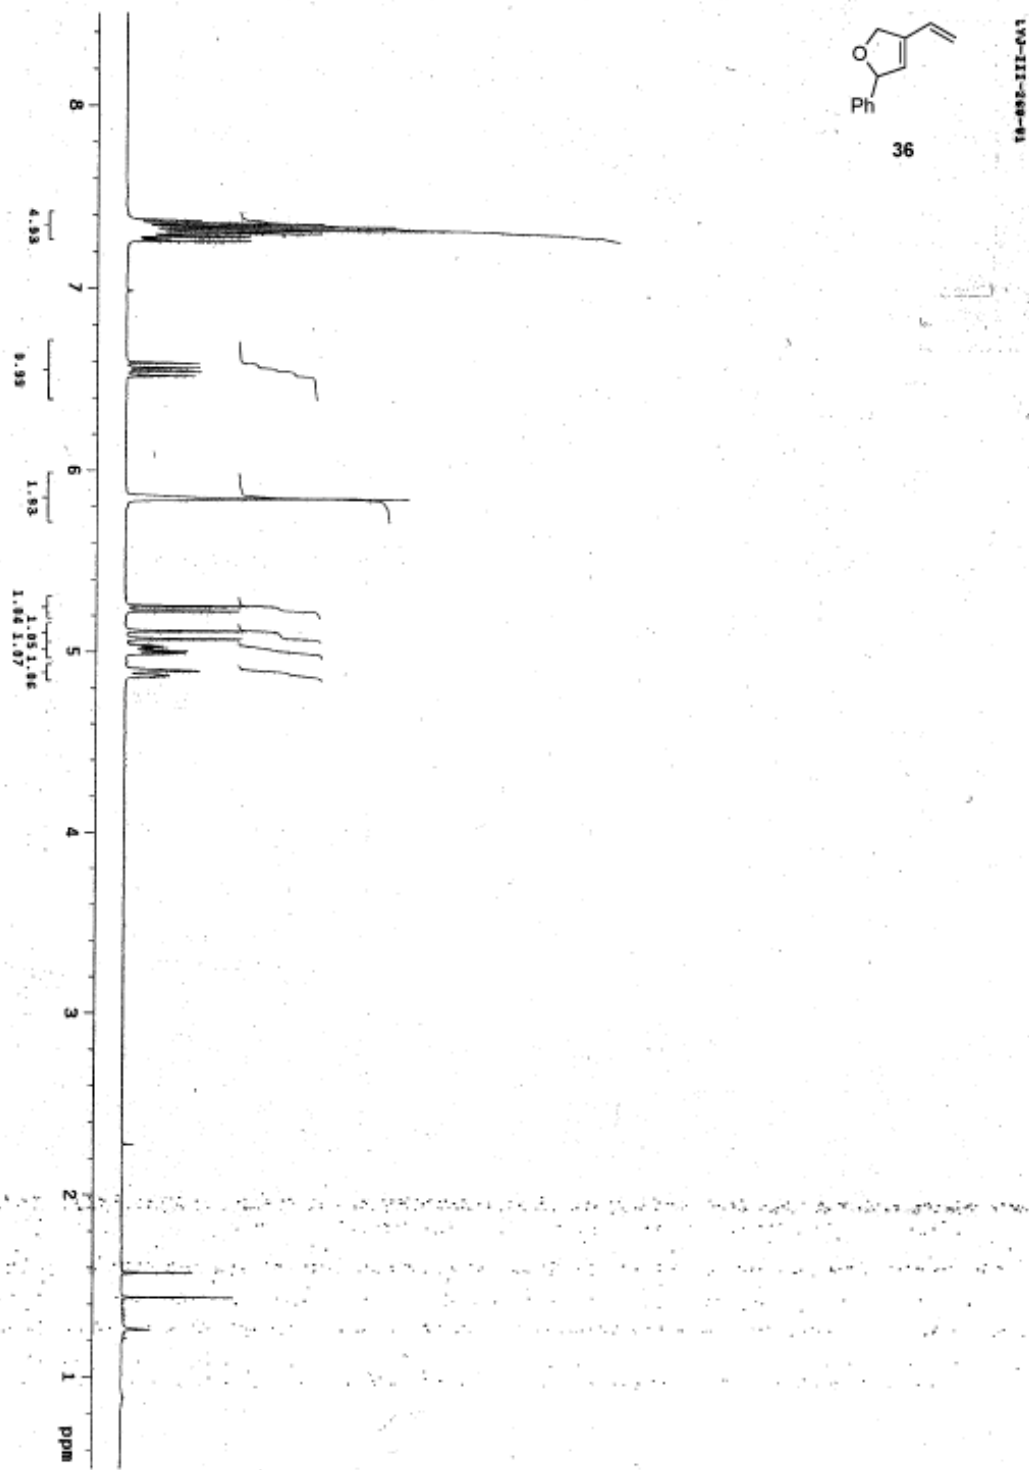







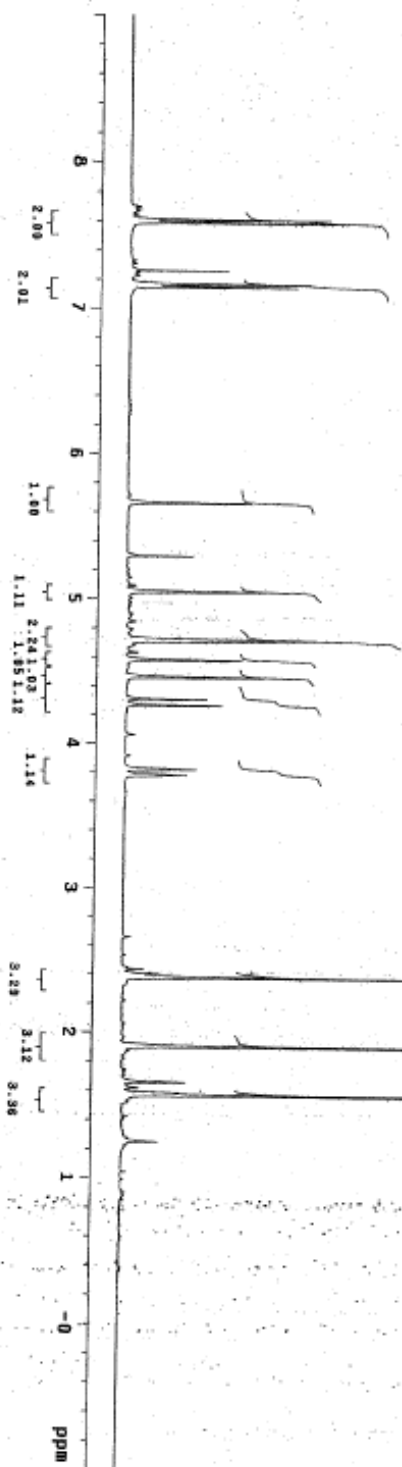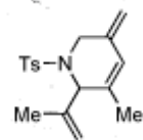

49

13C-NMR-129-32-M

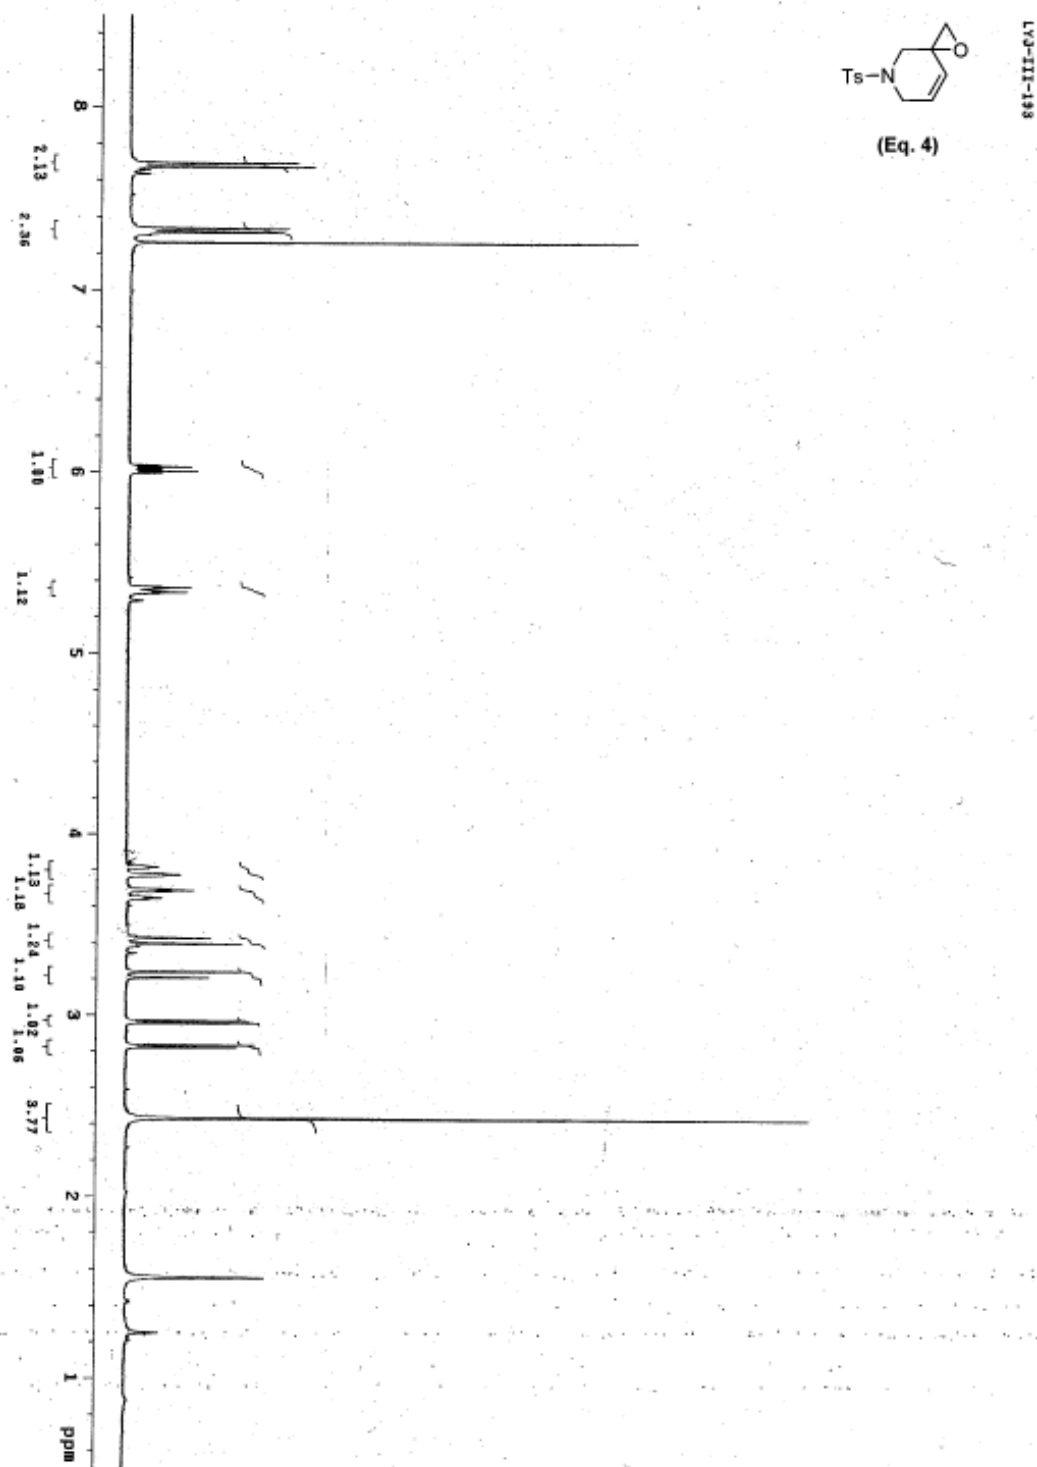

Supplement: NIHMS173123-supplement-data_1.pdf [file NIHMS173123-supplement-data_1.pdf]
